1 Kinetics of the inflammatory response during experimental *Babesia rossi*  
2 infection of beagle dogs

3 B.K. Atkinson<sup>1\*</sup>, P. Thompson<sup>2</sup>, E. Van Zyl<sup>1</sup>, A. Goddard<sup>1</sup>, Y. Rautenbach<sup>1</sup>, J.P. Schoeman<sup>1</sup>, V.  
4 Mukorera<sup>1</sup>, A. Leisewitz<sup>1</sup>

5 1 Department of Companion Animal Clinical Studies, Faculty of Veterinary Science, University of  
6 Pretoria, Pretoria, South Africa

7 2 Department of Production Animal Studies, Faculty of Veterinary Science, University of Pretoria,  
8 Pretoria, South Africa

9

10 \* Corresponding author: B.K. Atkinson

11 Email: drbroganka@gmail.com

12

13

14

15

16

17

18

19

20

21

22

## 23 **Abstract**

24 *Babesia rossi* causes severe morbidity and mortality in dogs in sub-Saharan Africa, and the  
25 complications associated with this disease are likely caused by an unfocused, excessive inflammatory  
26 response. During this experimental *B. rossi* study we investigated inflammatory marker and cytokine  
27 kinetics during infection and after treatment. We aimed to determine whether infectious dose and  
28 treatment would influence the progression of the inflammatory response and clinical disease. Five  
29 healthy male beagle dogs were infected with *B. rossi*, three with a high infectious dose (HD group)  
30 and two with a low infectious dose (LD group). Clinical examination, complete blood count (CBC)  
31 and C-reactive protein (CRP) were determined daily. Cytokines were quantified on stored plasma  
32 collected during the study, using a canine specific cytokine magnetic bead panel (Milliplex©). The  
33 experiment was terminated when predetermined endpoints were reached. Parasitemia occurred on day  
34 1 and 3 in the HD group and LD group respectively. The rate of increase in parasitemia in the HD  
35 group was significantly faster than that seen in the LD group. Significant differences were found in  
36 heart rate, blood pressure, interferon gamma (INF $\gamma$ ), keratinocyte chemoattractant (KC), INF $\gamma$ -  
37 induced protein 10 (IP10), granulocyte-macrophage colony-stimulating factor (GM-CSF), monocyte  
38 chemoattractant protein 1 (MCP1), tumor necrosis factor alpha (TNF $\alpha$ ), interleukin 2 (IL-2), IL-6, IL-  
39 7, IL-8, IL-10 IL-15, IL-18, CRP, neutrophils and monocytes between groups at multiple time points  
40 during the course of the infection. Our findings suggest that the initiation of inflammation occurs  
41 before the onset of clinical disease in *B. rossi* infection and infectious dose influences the onset of the  
42 inflammatory response. Treatment not only fails to curb the inflammatory response but may enhance  
43 it. Finally, we found that there is an imbalance in pro/anti-inflammatory cytokine concentrations  
44 during infection which may promote parasite replication.

45

46

47

## 48 Introduction

49 *Babesia rossi*, a virulent *Babesia* species, causes a severe form of babesiosis in the domestic dog  
50 associated with a high rate of morbidity and mortality (1-3). Babesiosis is a complex multi-systemic  
51 disease that can be classified as either uncomplicated or complicated (2, 4, 5). Complicated babesiosis  
52 occurs when the pathology noted cannot be attributed purely to the anemia or when the anemia  
53 becomes severe enough to perpetuate organ dysfunction (2). *B. rossi* infection, like *Plasmodium*  
54 *falciparum* malaria in humans, results in a protozoal sepsis with a severe systemic inflammatory  
55 response (6-8). The concept of a ‘cytokine storm’ is well established in human inflammatory and  
56 infectious conditions, such as malaria and sepsis (9). This theory proposes that systemic illness and  
57 the course of disease is not solely caused by the microbes themselves but is also the result an  
58 unbalanced cytokine response to microbe antigens (10). The disease course seen in *B. rossi* infections  
59 bears a striking resemblance to that seen in falciparum malaria, leading one to hypothesize that a  
60 similar ‘cytokine storm’ may be an essential mechanism in the pathogenesis of this disease (11, 12). It  
61 is clear that *B. rossi* initiates a marked inflammatory response characterized by increased circulating  
62 markers such as C- reactive protein (CRP) and cytokines including monocyte-chemotactic protein-1  
63 (MCP-1), interleukin (IL)-2, IL-6, IL-10, IL-18 and tumor necrosis factor alpha (TNF $\alpha$ ) (13-15).  
64 Complications associated with this disease are likely the result of an unbalanced inflammatory  
65 cytokine response (13, 14, 16-18). Additional clinical and systemic indicators of inflammation, used  
66 to monitor affected dogs, which are associated with poor outcome in *B. rossi* infections include  
67 increased band neutrophil count, clinical collapse, presence of cerebral neurological signs and high  
68 parasitaemia (2, 14, 19).

69 Although we have some understanding of the inflammatory response triggered by *B. rossi*, all the  
70 existing research was performed in natural infections in dogs of various breeds, presented at variable  
71 disease stages and severity. In this prospective longitudinal experimental study, we aimed to  
72 investigate changes in markers of inflammation (cytokine concentrations, neutrophil count, monocyte  
73 count and CRP) and indicators of disease severity (including habitus, appetite, vital parameters,

74 parasitaemia and hematocrit) over time in an experimental *B. rossi* infection of beagle dogs. We also  
75 aimed to investigate the influence infectious dose and treatment would have on disease progression.  
76 Finally, we wanted to identify if any significant correlations existed among the markers of  
77 inflammation and indicators of disease severity. We hypothesized, and found, that *B. rossi* infection  
78 initiates a pronounced, unbalanced inflammatory response and that infectious dose as well as  
79 treatment alter disease progression.

80

## 81 **Materials and methods**

82

### 83 **Animals**

84 This prospective longitudinal experimental study included six 6-month-old purpose bred sterilized male  
85 beagle dogs. The dogs were obtained from a commercial breeder (StudVet Beagles, RSA) and  
86 microchipped to allow for accurate identification. Vaccination and deworming programs were current.  
87 All dogs were clinically healthy and free of regional tick-borne diseases at the start of the experimental  
88 study, confirmed by hematology, serum biochemistry and polymerase chain reaction and reverse line  
89 blotting (PCR-RLB) for *Babesia*, *Ehrlichia*, *Theileria* and *Anaplasma*. One dog was splenectomized  
90 and used to raise a viable parasite inoculum from cryopreserved wild type *B. rossi*. The remaining five  
91 dogs were randomly assigned to one of two groups, namely the 3 dogs in the high dose (HD) and 2 dogs  
92 in the low dose (LD) groups, and experimentally infected with the corresponding *B. rossi* parasite  
93 inoculum dose. The mean of samples collected at two separate time points, 4 and 2 weeks prior to  
94 inoculation, from each of the 5 remaining experimental dogs formed the baseline data against which  
95 changes were compared overtime. Samples from the dog selected for the splenectomy were not included  
96 in the baseline data set. This experimental study was approved by the Animal Ethics Committee of the  
97 Faculty of Veterinary Science at the University of Pretoria (REC048-19).

98

## 99 **Preparation of the *Babesia rossi* inoculum and initiation of the** 100 **infection**

101 One randomly selected dog was splenectomized by a specialist surgeon and allowed 4 weeks recovery  
102 time after the surgery. The cryopreservate was created using blood from a dog naturally infected with  
103 *B. rossi* which was tested, and found to be negative for other blood-borne parasites using PCR-RLB  
104 and stored at -80°C. The splenectomized dog was then injected with 2 mL of thawed *B. rossi*  
105 cryopreservate intravenously, followed by a further 2 mL 24 hours later. Parasitemia was determined  
106 12-hourly using a previously described technique, starting one day post-inoculation (19). Parasitemias  
107 were all determined on central venous blood. Once a parasitemia was detected and quantified, citrated  
108 whole blood was collected from the splenectomized dog. Using culture media (Culture Media RPMI  
109 1640, Hepes, filtered water, sodium bicarbonate, sodium pyruvate and gentamycin), the blood sample  
110 was serially diluted to obtain the two inoculum doses,  $10^8$  and  $10^4$  parasitized red blood cells for the  
111 high and low doses respectively. The dogs in the HD and LD groups were then inoculated intravenously  
112 with the respective doses.

113

## 114 **Daily monitoring**

115 All dogs were examined by a veterinarian once daily from the day of inoculation until the onset of  
116 clinical signs and thereafter as frequently as was deemed necessary to ensure adequate care until  
117 recovery. The experiment lasted a total of 8 days from point of inoculation to termination, with  
118 treatment being required from day 4. Habitus, appetite, temperature, heart rate, respiratory rate, mucous  
119 membrane color and blood pressure (using a non-invasive oscillometric technique – Vet-HDO®  
120 Monitor) were determined daily, at the same time each morning. Blood pressure was measured on the  
121 tail of each dog, whilst lying in lateral recumbency. All dogs were thoroughly acclimated to this process  
122 prior to initiation of the experimental study to reduce stress associated increases in blood pressure during  
123 handling and sample collection.

## 124 **Hematology and biochemistry**

125 Blood was collected atraumatically from the jugular vein into EDTA Vacutainer Brand Tubes (Beckton  
126 Dickinson Vacutainer Systems, UK) for a daily CBC (ADVIA 2120i, Siemens, Germany) and the  
127 EDTA plasma was then stored at -80°C. Blood samples were collected into serum Vacutainer brand  
128 tubes (Beckton Dickinson Vacutainer Systems, UK) every second day for CRP measurements. The  
129 CRP was analyzed using canine specific immunoturbidimetric CRP method<sup>h</sup> (Gentian, Norway) run on  
130 the Cobas Integra 400 plus (Roche, Switzerland).

131

## 132 **Cytokine analysis**

133 Once the experiment was concluded, the stored batched EDTA plasma samples were thawed at room  
134 temperature and used to determine granulocyte-macrophage colony-stimulating factor (GM-CSF),  
135 interferon gamma (INF $\gamma$ ), IL-2, IL-6, IL-7, IL-8, IL-15, IL-10, IL-18, TNF- $\alpha$ , INF $\gamma$ -induced protein  
136 10 (IP-10), keratinocyte chemoattractant (KC-like) and MCP-1. Concentrations were determined in  
137 duplicate by fluorescent-coded magnetic beads (MagPlex-C; MILLIPLEX. MAP Kit, Canine  
138 Cytokine Magnetic Bead Panel, 96-Well Plate Assay, CCYTO-90K, Millipore, Billerica, MA), based  
139 on the Luminex xMAP technology (Luminex 200, Luminex Corporation, Austin, TX). Two quality  
140 controls were included in the plate as internal quality controls. The assay was performed according to  
141 the manufacturer's instructions. Cytokine concentrations were determined by comparing the optical  
142 density of the samples to the standard curves, produced from standards run on the same plate. The  
143 minimum detectable concentrations of the cytokines provided by the manufacturer were regarded as  
144 the detection limits in this study. Measurable values below the detection limit were assigned a value  
145 equal to the minimum detectable concentration for the respective cytokine and those with no  
146 measurable values were set as zero.

147

## 148 **Chemotherapeutic intervention**

149 The infection was allowed to run its course until one of the following endpoints were identified:  
150 hematocrit <15%, collapsed habitus, nervous signs (such as seizure activity), clinical evidence of lung  
151 pathology with arterial blood gas evidence of acute respiratory distress syndrome (arterial partial  
152 pressure of oxygen [PaO<sub>2</sub>] <60mmHg), serum creatinine > 200mmol/L (normal <140 mmol/L) and  
153 hemoconcentration (PCV >55%). The infection ran its course for 4 days prior to intervention. The HD  
154 group was treated on day 4 in the morning (at 96 hours). Due to the unexpected death of one dog in  
155 the HD group, to avoid any further losses, the LD group was treated 12 hours later (at 108 hours) even  
156 though they had not reached the same degree of disease severity as the HD group. All dogs were drug  
157 cured with diminazene aceturate (3.5 mg/Kg subcutaneously) and provided with supportive treatment  
158 as needed. The remaining 5 dogs (including the splenectomized dog) recovered completely and were  
159 rehomed as pets.

160

## 161 **Statistical analysis**

162 For the statistical analysis, variables that were shown to be non-normally distributed, were log-  
163 transformed; these were parasitemia, the leukocyte counts, CRP, GM-CSF, IFN $\gamma$ , KC-like, all the  
164 interleukins, MCP-1 and TNF $\alpha$ . The other variables were not transformed. The means of the variables  
165 were then compared between the HD group and the LD group at each time point as well as between  
166 each time point and the mean baseline value within each group using linear mixed models, with animal  
167 identity as a random effect and the Bonferroni adjustment for multiple comparisons was applied.  
168 Pairwise correlations between variables were assessed using Spearman's rank correlation. Significance  
169 was assessed at P<0.05. Statistical analysis was done using Stata 15 (StataCorp, College Station, TX,  
170 U.S.A.). Significant values in the text will be presented as the mean followed by the range and P value.  
171 Graphical presentation of some variables are included with error bars representing the standard  
172 deviation.

173

174

## 175 **Results**

176

177 The demographic characteristics of the experimental group of dogs were as follows: All dogs were 6-  
178 month-old sterilized male beagle dogs. All 6 dogs tested negative for *Babesia*, *Ehrlichia*, *Anaplasma*  
179 and *Theileria* based on PCR-RLB done prior to the initiation of the experimental study. No significant  
180 difference was noted between the LD group and HD group for baseline data for any variable.

181

### 182 **Clinical variables**

183 The HD group demonstrated changes in the clinical variables including habitus, appetite, temperature,  
184 heart rate and respiratory rate between 36 to 48 hours earlier than the LD group, indicating a more  
185 rapid onset of clinical disease in this group. Increases in diastolic (76 mmHg, range 74 – 77 vs  
186 baseline: 65 mmHg, range 63 – 67;  $p = 0.013$ ), systolic (156 mmHg, range 145 – 161 vs baseline: 124  
187 mmHg, range 122 – 125;  $p < 0.001$ ) and mean arterial pressures (105 mmHg, range 101 – 110 vs  
188 baseline: 86 mmHg, range 74 – 87;  $p < 0.001$ ) above baseline were noted in the HD group at 72  
189 hours.

190

### 191 **Clinicopathological variables**

192 The HD group had a detectable parasitemia 48 hours earlier than the LD group (Fig 1). There was a  
193 rapid increase in parasitemia thereafter, peaking at 46.76% (range 34.95 – 59.8) at 96 hours in the HD  
194 group and 5.76% (range 4.71 – 6.81) at 108 hours in the LD group. Parasitemia was strongly  
195 correlated to KC-like ( $r = 0.888$ ,  $p < 0.001$ ), IL-10 ( $r = 0.676$ ,  $p = 0.009$ ) and mature neutrophil count  
196 ( $r = -0.674$ ,  $p < 0.001$ ). Hematocrit (Hct) (Fig 2) declined significantly decline compared to baseline  
197 at 96 hours ( $p < 0.001$ ) in the HD group and 120 hours ( $p = 0.003$ ) in the LD group and both groups



198 demonstrated a progressive decrease in Hct after treatment. Hemoglobinemia was visibly present from  
199 72 hours in the HD group.

200

201 Fig 1. Parasitemia from inoculation of *B. rossi* until 4 days after treatment (Error bars represent there  
202 SD)

203

204 Fig 2. Hematocrit during *B. rossi* infection and after treatment (Error bars represent there SD)

205

206 For the HD group, increases in CRP concentrations (Fig 3) above baseline (14.33 mg/L, 10 – 21.5)  
207 peaked at 72 hours (150 mg/L, 135 – 163,  $p < 0.001$ ) and remained significantly increased at 96 hours  
208 (125 mg/L, 92 – 160,  $p < 0.001$ ), 120 hours (81.5 mg/L, 81 – 82,  $p < 0.001$ ) and 144 hours (59 mg/L,  
209 54 – 64,  $p < 0.001$ ). The LD group showed a marked increase in CRP above baseline (25 mg/L, 10 –  
210 40) at 108 hours (175 mg/L, 160 – 197,  $p < 0.001$ ), declining thereafter but remaining significantly  
211 increased for the remainder of the study. The CRP concentrations peaked 36-hours earlier in the HD  
212 group. C-reactive protein was significantly correlated with temperature ( $r = 0.722$ ,  $p = 0.003$ ) and the  
213 correlation between CRP and parasitemia approached significance ( $r = 0.646$ ,  $p = 0.056$ ). A  
214 significant decrease in mature neutrophil (Fig 4) count was seen from 72 hours ( $1.79 \times 10^9/L$ , 1.36 –  
215 2.44,  $p < 0.001$ ) in HD group and 108 hours in the LD group ( $1.49 \times 10^9/L$ , 1.17 – 1.81,  $p < 0.001$ ).  
216 The neutrophil nadirs for the HD and LD groups were seen at 96 ( $1.57 \times 10^9/L$ , 1.12 – 1.88,  $p <$   
217  $0.001$ ) and 108 hours ( $1.49 \times 10^9/L$ , 1.17 – 1.81,  $p < 0.001$ ) respectively. In the HD group there was a  
218 marked increase in the mature neutrophil counts after treatment, exceeding laboratory reference  
219 intervals ( $3 - 11.5 \times 10^9/L$ ) at 168 ( $17.64 \times 10^9/L$ , 12.21 – 23.07,  $p < 0.001$ ) and 192 hours ( $27.35 \times$   
220  $10^9/L$ , 23.75 – 30.94,  $p < 0.001$ ). After treatment there was a gradual recovery of the mature  
221 neutrophil count in the LD group, returning to within laboratory reference intervals at 192 hours. A  
222 significant increase in band neutrophil counts (Fig 4) above baseline ( $0.14 \times 10^9/L$ , 0.13 – 0.17) was  
223 seen in the HD group at 120 hours ( $1.81 \times 10^9/L$ , 0.88 – 2.74,  $p < 0.001$ ), 168 hours ( $2.77 \times 10^9/L$ ,

224 2.28 – 3.25,  $p < 0.001$ ) and 192 hours ( $6.45 \times 10^9/L$ , 4.32 – 8.57,  $p < 0.001$ ). Band neutrophils counts  
225 exceeded the laboratory reference interval ( $0 - 0.5 \times 10^9/L$ ) consistently after treatment in the HD  
226 group. At no point during the study did the band neutrophil count in the LD group increase  
227 significantly above baseline values or exceed the laboratory reference interval. A significant reduction  
228 in monocyte count compared to baseline ( $0.52 \times 10^9/L$ , 0.46 – 0.65) was seen in the HD group at 24  
229 ( $0.28 \times 10^9/L$ , 0.2 – 0.32,  $p = 0.044$ ) and 48 hours ( $0.27 \times 10^9/L$ , 0.2 – 0.34,  $p = 0.024$ ). Following  
230 treatment, the monocyte counts were increased at 144 ( $1.86 \times 10^9/L$ , 1.27 – 2.45,  $p < 0.001$ ), 168  
231 ( $3.13 \times 10^9/L$ , 2.69 – 3.57,  $p < 0.001$ ) and 192 hours ( $3.04 \times 10^9/L$ , 1.8 – 4.28,  $p < 0.001$ ) in the HD  
232 group, exceeding the laboratory reference interval ( $0.15 - 1.35 \times 10^9/L$ ) from 144 hours onwards.

233

234 Fig 3. C-reactive protein concentrations during *B. rossi* infection and after treatment

235

236 Fig 4. Mature and band neutrophil counts during *B. rossi* infection and after treatment

237

## 238 Cytokine kinetics

239 Thirteen cytokines were evaluated, and the results were divided into 4 groups by pattern of change.

### 240 a. Cytokines that increased during infection and decreased after treatment

241 The cytokines which fall into this category included IFN $\gamma$  and KC-like (Table 1). The HD group had a  
242 significant increase in IFN $\gamma$  concentrations (Fig 5) above baseline ( $p = 0.002$ ) and above the LD group  
243 ( $p < 0.001$ ) at 48 hours. The LD group had peak concentrations 48-hours later, at 96 hours ( $p <$   
244 0.001). There was a progressive and significant increase in KC-like concentrations (Fig 6) in the HD  
245 group above baseline at 24 hours ( $p < 0.001$ ), 48 hours ( $p < 0.001$ ), 72 hours ( $p < 0.001$ ) and 96 hours  
246 ( $p < 0.001$ ) declining significantly at 144 hours ( $p = 0.004$ ) and 192 hours ( $p < 0.001$ ). The LD group  
247 only had significant increase in KC-like concentrations above baseline at 96 hours ( $p < 0.001$ ). Strong

248 correlations were identified between KC-like and parasitaemia ( $r = 0.888, p < 0.001$ ) as well as KC-  
249 like and mature neutrophil count ( $r = -0.817, p < 0.001$ ).

250

251 Fig 5. IFN  $\gamma$  concentrations during *B. rossi* infection and after treatment

252

253 Fig 6. KC-like concentrations during *B. rossi* infection and after treatment

254

## 255 **b. Cytokines that increased during infection and remained high after** 256 **treatment**

257 This category included the following cytokines MCP-1, IL-6, IL-8 and IL-10 (Table 1). The  
258 chemokine MCP-1 concentrations (Fig 7) increased above baseline in the HD group from 24 hours  
259 onwards reaching significance after treatment at 144 hours ( $p < 0.001$ ) and 192 hours ( $p = 0.001$ ). The  
260 LD group did not have significant increases in MCP-1 concentrations throughout the study but one  
261 dog in this group did demonstrate increased concentrations after treatment. Interleukin-6  
262 concentrations (Fig 8) were moderately increased above baseline at 96 hours ( $p = 0.049$ ) in the HD  
263 group and progressively increased after treatment, at 144 hours ( $p < 0.001$ ) and 192 hours ( $p < 0.001$ ).  
264 Like changes seen in MCP-1, one dog in the LD group had increased IL-6 at 192 hours but this did  
265 not reach significance. Interleukin-6 and MCP-1 were strongly correlated ( $r = 0.792, p < 0.001$ ). The  
266 HD group had significantly reduced IL-8 concentrations (Fig 9) compared to baseline at 72 hours ( $p =$   
267  $0.004$ ), with a marked increase at 96 hours ( $p < 0.001$ ). The LD group only had significantly increased  
268 IL-8 concentrations at 192 hours ( $p = 0.003$ ). Interleukin-10 concentrations (Fig 10) increased  
269 significantly above baseline at 24 hours ( $p = 0.019$ ), 72 hours ( $p < 0.001$ ) and 96 hours ( $p < 0.001$ ) in  
270 the HD group. The LD group showed no significant increase in IL-10 but both dogs demonstrated a  
271 progressive increase in concentrations from 72 hours after inoculation until treatment, remaining  
272 increased in one dog after treatment. A strong positive correlation was identified between  
273 parasitaemia and IL-10 ( $r = 0.674, p = 0.009$ ) as well as between IL-10 and MCP-1 ( $r = 0.828, p <$   
274  $0.001$ ). Similar kinetic profiles were seen between the HD and LD groups for MCP-1 and IL-10,

275 varying in onset but not necessarily severity. IL-8 and IL-6 concentrations however appeared to  
276 follow different kinetic pathways between the HD and LD groups with the LD group demonstrating  
277 higher concentrations for the first 72 hours after inoculation. Interestingly the dog that died in the HD  
278 group had considerably higher concentrations of MCP-1 and IL-6 than any other dog at 96 hours.

279

280 Fig 7. MCP-1 concentrations during *B. rossi* infection and after treatment

281

282 Fig 8. IL-6 concentrations during *B. rossi* infection and after treatment

283

284 Fig 9. IL-8 concentrations during *B. rossi* infection and after treatment

285

286 Fig 10. IL-10 concentrations during *B. rossi* infection and after treatment

287

### 288 **c. Cytokines that increased after treatment**

289 The next category of cytokines, GM-CSF (Fig 11), TNF $\alpha$  (Fig 12), IL-2 (Fig 13) and IL-7, had very  
290 similar patterns of change and were all markedly increased after treatment in the HD group,  
291 particularly in one dog (Table 1). Significant increases in these cytokines were seen after treatment, at  
292 144 (GM-CSF  $p < 0.001$ ; TNF $\alpha$   $p < 0.001$ ; IL-2  $p < 0.001$  and IL-7  $p = 0.002$ ) and 192 hours (GM-  
293 CSF  $p < 0.001$ ; TNF $\alpha$   $p < 0.001$ ; IL-2  $p < 0.001$  and IL-7  $p = 0.004$ ). Although not statistically  
294 significant, one dog from the LD group showed a similar profile after treatment, with marked  
295 increases in all 4 cytokines although not to the same degree as seen in the HD group. The dogs with  
296 the highest parasitemia in each group demonstrated the greatest increases in cytokine concentrations  
297 after treatment. Tumour necrosis factor alpha demonstrated strong correlations with IL-6 ( $r = 0.925$ ,  $p$   
298  $< 0.001$ ), GM-CSF ( $r = 0.811$ ,  $p < 0.001$ ), IL-2 ( $r = 0.810$ ,  $p < 0.001$ ) as well as IL-7 ( $r = 0.810$ ,  $p <$   
299  $0.001$ ). Interleukin 2 and IL-7 were also strong correlated ( $r = 0.872$ ,  $p < 0.001$ ).

300

301 Fig 11. GM-CSF concentrations during *B. rossi* infection and after treatment

302

303 Fig 12. TNF $\alpha$  concentrations during *B. rossi* infection and after treatment

304

305 Fig 13. IL-2 concentrations during *B. rossi* infection and after treatment

306

#### 307 **d. Cytokines that showed no distinct pattern of change**

308 The last three cytokines, IL-15, IL-18 and IP-10 showed minor changes in their concentrations during  
309 the course of the experiment. IL-15 (LD: 3043.38 pg/mL, 64 – 6022.76 vs HD: 23.36 pg/mL, 0 –  
310 46.76,  $p < 0.001$ ) and IL-18 (LD: 792.75 pg/mL, 18.86 – 1566.64 vs HD: 7.59 pg/mL, 0 – 15.17,  $p =$   
311 0.016) concentrations were significantly increased at 192 hours in the LD group. Interleukin 15 and  
312 IL-18 were strongly correlated ( $r = 0.981$ ,  $p < 0.001$ ). Finally, IP-10 showed mild increases in both  
313 groups during the study period.

314

315

316

317

318 **Table 1:** Cytokine concentrations during *B. rossi* infection and after treatment

|                                            | Baseline                 | 24 hours                  | 48 hours                  | 72 hours                  | 96 hours                   | 144 hours                    | 192 hours                 |
|--------------------------------------------|--------------------------|---------------------------|---------------------------|---------------------------|----------------------------|------------------------------|---------------------------|
| <b>IFN<math>\gamma</math>:</b> Units pg/mL |                          |                           |                           |                           |                            |                              |                           |
| <b>LD mean (Range)</b>                     | 0                        | 6.8<br>(0–13.6)           | 0                         | 7.42<br>(0–14.83)         | 128.3<br>(50.28–206.32)    | 16.2<br>(13.6–18.79)         | 13.62<br>(0–27.24)        |
| <b>HD mean (Range)</b>                     | 10.96<br>(0–32.885)      | 33.32<br>(13.6–63.54)     | 77.08<br>(19.48–124.28)   | 9.22<br>(0–14.07)         | 16.07<br>(0–24.11)         | 14.4<br>(13.6–15.2)          | 18.05<br>(13.6–22.49)     |
| <b>P value: LD vs HD</b>                   | 1.000                    | 0.271                     | <0.001*                   | 1.000                     | 0.071                      | 1.000                        | 1.000                     |
| <b>LD vs Base</b>                          | NA                       | 1.000                     | 1.000                     | 1.000                     | 0.000*                     | 0.040*                       | 1.000                     |
| <b>HD vs Base</b>                          | NA                       | 0.073                     | 0.002                     | 1.000                     | 1.000                      | 0.815                        | 0.503                     |
| <b>KC-like:</b> Units pg/mL                |                          |                           |                           |                           |                            |                              |                           |
| <b>LD mean (Range)</b>                     | 27.36<br>(19.58–35.14)   | 40.45<br>(36.18–44.71)    | 30.07<br>(17.88–42.25)    | 49.05<br>(44.6–53.49)     | 152.37<br>(104.96–199.77)  | 46.09<br>(33.52–58.66)       | 21.83<br>(16.14–27.52)    |
| <b>HD mean (Range)</b>                     | 23.87<br>(18.19–31.38)   | 84.97<br>(52–140.06)      | 87.58<br>(67.16–104.96)   | 141.4<br>(103.74–183.18)  | 766.48<br>(625.08–913.78)  | 11.01<br>(8.13–13.89)        | 5.02<br>(4.2–5.84)        |
| <b>P value: LD vs HD</b>                   | 1.000                    | 0.050*                    | <0.001*                   | <0.001*                   | <0.001*                    | <0.001*                      | <0.001*                   |
| <b>LD vs Base</b>                          | NA                       | 0.763                     | 1.000                     | 0.084                     | <0.001*                    | 0.273                        | 1.000                     |
| <b>HD vs Base</b>                          | NA                       | <0.001*                   | <0.001*                   | <0.001*                   | <0.001*                    | 0.004*                       | <0.001*                   |
| <b>MCP-1:</b> Units pg/mL                  |                          |                           |                           |                           |                            |                              |                           |
| <b>LD mean (Range)</b>                     | 156.19<br>(123.49–188.9) | 174.05<br>(103.86–244.23) | 144.31<br>(56.05–232.56)  | 212.77<br>(196.48–229.06) | 360.59<br>(253.52–467.65)  | 195.97<br>(98.85–293.09)     | 541.64<br>(70.61–1012.66) |
| <b>HD mean (Range)</b>                     | 67.1<br>(64.67–68.86)    | 244.06<br>(225.92–264.24) | 282.53<br>(241.14–321.89) | 336.13<br>(258.86–404.03) | 1217.07<br>(523.22–2271.2) | 49402.62<br>(201.93–98603.3) | 113660<br>(74.19–113660)  |
| <b>P value: LD vs HD</b>                   | 0.335                    | 1.000                     | 1.000                     | 1.000                     | 1.000                      | 0.078                        | 0.232                     |
| <b>LD vs Base</b>                          | NA                       | 1.000                     | 1.000                     | 1.000                     | 1.000                      | 1.000                        | 1.000                     |
| <b>HD vs Base</b>                          | NA                       | 1.000                     | 1.000                     | 1.000                     | 0.050                      | <0.001*                      | 0.001*                    |
| <b>IL-6:</b> Units pg/mL                   |                          |                           |                           |                           |                            |                              |                           |
| <b>LD mean (Range)</b>                     | 20.42<br>(18.49–22.36)   | 51.21<br>(17.32–85.09)    | 43.89<br>(7.14–80.63)     | 39.69<br>(14.27–65.1)     | 39.16<br>(15.81–62.51)     | 93.75<br>(16.32–171.18)      | 500.38<br>(13.06–987.69)  |

|                            |                           |                           |                           |                           |                             |                              |                              |
|----------------------------|---------------------------|---------------------------|---------------------------|---------------------------|-----------------------------|------------------------------|------------------------------|
| <b>HD mean (Range)</b>     | 8.95<br>(4.09–15.29)      | 18.88<br>(8.5–29.58)      | 24.33<br>(14.96–34.98)    | 22.49<br>(20.46–25.9)     | 280.67<br>(40.22–644.35)    | 17999.95<br>(39.47– 5960.43) | 30369.21<br>(10.56–60727.85) |
| <b>P value: LD vs HD</b>   | 1.000<br>NA               | 1.000<br>1.000            | 1.000<br>1.000            | 1.000<br>1.000            | 1.000<br>1.000              | 0.226<br>1.000               | 1.000<br>1.000               |
| <b>LD vs Base</b>          | NA                        | 1.000                     | 1.000                     | 1.000                     | 0.049*                      | <0.001*                      | <0.001*                      |
| <b>HD vs Base</b>          |                           |                           |                           |                           |                             |                              |                              |
| <b>IL-8: Units pg/mL</b>   |                           |                           |                           |                           |                             |                              |                              |
| <b>LD mean (Range)</b>     | 87.02<br>(71.8–102.25)    | 256.96<br>(211.61–302.31) | 218.71<br>(103.39–334.03) | 101.11<br>(78.62–123.59)  | 70.27<br>(48.04–92.5)       | 214.17<br>(103.39–324.95)    | 519.26<br>(193.33 – 845.19)  |
| <b>HD mean (Range)</b>     | 154.91<br>(139.24–165.98) | 125.58<br>(76.02–176)     | 157.68<br>(144.41–164.83) | 44.78<br>(37.03–55.44)    | 867.64<br>(271.26–1817.67)  | 245.34<br>(53.25–437.43)     | 248.71<br>(123.03 – 374.39)  |
| <b>P value: LD vs HD</b>   | 1.000<br>NA               | 0.650<br>0.134            | 1.000<br>0.836            | 0.522<br>1.000            | <0.001*<br>1.000            | 1.000<br>0.897               | 1.000<br>0.003*              |
| <b>LD vs Base</b>          | NA                        | 1.000                     | 1.000                     | 0.004*                    | <0.001*                     | 1.000                        | 1.000                        |
| <b>HD vs Base</b>          |                           |                           |                           |                           |                             |                              |                              |
| <b>IL-10: Units pg/mL</b>  |                           |                           |                           |                           |                             |                              |                              |
| <b>LD mean (Range)</b>     | 42.65<br>(12.1–73.19)     | 36.2<br>(16.1–56.29)      | 51.85<br>(27.29– 6.41)    | 124.03<br>(81.89–166.16)  | 288.42<br>(229.09–347.74)   | 126.24<br>(87.43–165.05)     | 204.61<br>(8.5–400.72)       |
| <b>HD mean (Range)</b>     | 16.57<br>(16.05–23.34)    | 98.13<br>(36.57–211.81)   | 131.01<br>(109.22–147.73) | 253.56<br>(182.15–384.13) | 680.69<br>(150.44– 1429.07) | 121.15<br>(44.27–198.02)     | 110.26<br>(8.5–212.01)       |
| <b>P value: LD vs HD</b>   | 1.000<br>NA               | 1.000<br>1.000            | 1.000<br>1.000            | 1.000<br>1.000            | 1.000<br>0.074              | 1.000<br>1.000               | 1.000<br>1.000               |
| <b>LD vs Base</b>          | NA                        | 0.294                     | 0.019*                    | <0.001*                   | <0.001*                     | 0.207                        | 1.000                        |
| <b>HD vs Base</b>          |                           |                           |                           |                           |                             |                              |                              |
| <b>GM-CSF: Units pg/mL</b> |                           |                           |                           |                           |                             |                              |                              |
| <b>LD mean (Range)</b>     | 35.07<br>(34.06–36.09)    | 78.89<br>(33.23–124.54)   | 60.68<br>(14.13–107.23)   | 53.87<br>(24.78–82.95)    | 39.78<br>(11.25–68.31)      | 177.71<br>(22.96–332.46)     | 1228.75<br>(18.95–2438.55)   |
| <b>HD mean (Range)</b>     | 9.2<br>(9.2–9.2)          | 22.53<br>(0–58.38)        | 15.64<br>(0–37.71)        | 9.1<br>(0–27.3)           | 22.36<br>(11.25–32.07)      | 4629.59<br>(38.37–9220.8)    | 4620.24<br>(19.67–9220.8)    |
| <b>P value: LD vs HD</b>   | 1.000<br>NA               | 0.847<br>1.000            | 1.000<br>1.000            | 0.337<br>1.000            | 1.000<br>1.000              | 1.000<br>1.000               | 1.000<br>0.788               |
| <b>LD vs Base</b>          | NA                        | 1.000                     | 1.000                     | 1.000                     | 1.000                       | <0.001*                      | <0.001*                      |
| <b>HD vs Base</b>          |                           |                           |                           |                           |                             |                              |                              |
| <b>TNFα: Units pg/mL</b>   |                           |                           |                           |                           |                             |                              |                              |
| <b>LD mean (Range)</b>     | 12.6<br>(12.28–12.93)     | 36.38<br>(8.74–64.02)     | 32.15<br>(6.1–58.2)       | 24.58<br>(6.97–42.18)     | 23.34<br>(6.1–40.63)        | 76.88<br>(7.96–145.8)        | 422.07<br>(6.77–837.37)      |
| <b>HD mean (Range)</b>     | 6.1<br>(6.1–6.1)          | 9.55<br>(6.1–14.19)       | 9.46<br>(6.1–12.61)       | 10.62<br>(6.1–13.72)      | 22.95<br>(13.08–37.97)      | 6306.60<br>(13.77–12599.51)  | 7699.37<br>(6.1–15392.63)    |

|                          |                        |                         |                      |                        |                       |                              |                              |
|--------------------------|------------------------|-------------------------|----------------------|------------------------|-----------------------|------------------------------|------------------------------|
| <b>P value: LD vs HD</b> | 1.000<br>NA            | 1.000<br>1.000          | 1.000<br>1.000       | 1.000<br>1.000         | 1.000<br>1.000        | 0.652<br>1.000               | 1.000<br>1.000               |
| <b>LD vs Base</b>        | NA                     | 1.000                   | 1.000                | 1.000                  | 0.637                 | <0.001*                      | <0.001*                      |
| <b>HD vs Base</b>        |                        |                         |                      |                        |                       |                              |                              |
| <b>IL-2: Units pg/mL</b> |                        |                         |                      |                        |                       |                              |                              |
| <b>LD mean (Range)</b>   | 21.24<br>(18.67–23.82) | 65.94<br>(12.19–119.68) | 53.62<br>(0–107.23)  | 41.11<br>(7.13–75.08)  | 31.68<br>(0–63.35)    | 135.89<br>(7.65–264.13)      | 1052.81<br>(3.5–2102.12)     |
| <b>HD mean (Range)</b>   | 7.64<br>(0–19.42)      | 20.34<br>(0–37.66)      | 14.43<br>(3.5–29.09) | 5.44<br>(0–12.81)      | 5.48<br>(3.5–9.44)    | 71563.81<br>(29.33–143098.3) | 177399<br>(7.91–354790.1)    |
| <b>P value: LD vs HD</b> | 1.000<br>NA            | 1.000<br>1.000          | 1.000<br>1.000       | 1.000<br>1.000         | 1.000<br>1.000        | 0.329<br>1.000               | 0.801<br>1.000               |
| <b>LD vs Base</b>        | NA                     | 1.000                   | 1.000                | 1.000                  | 1.000                 | <0.001*                      | <0.001*                      |
| <b>HD vs Base</b>        |                        |                         |                      |                        |                       |                              |                              |
| <b>IL-7: Units pg/mL</b> |                        |                         |                      |                        |                       |                              |                              |
| <b>LD mean (Range)</b>   | 20.23<br>(15.64–24.82) | 55.79<br>(18.26–93.31)  | 45.83<br>(7.5–84.15) | 38.08<br>(12.89–63.26) | 29.12<br>(7.5–50.74)  | 148.96<br>(16.14–281.77)     | 967.68<br>(22.91–1912.44)    |
| <b>HD mean (Range)</b>   | 20.92<br>(7.5–47.77)   | 20.03<br>(7.5–32.12)    | 12.4<br>(7.5–17.84)  | 7.84<br>(3.39–13.57)   | 15.28<br>(7.83–23.08) | 22636.76<br>(23.42–45250.1)  | 29754.71<br>(11.77–59497.64) |
| <b>P value: LD vs HD</b> | 1.000<br>NA            | 1.000<br>1.000          | 1.000<br>1.000       | 1.000<br>1.000         | 1.000<br>1.000        | 0.522<br>1.000               | 1.000<br>0.769               |
| <b>LD vs Base</b>        | NA                     | 1.000                   | 1.000                | 1.000                  | 1.000                 | 0.002*                       | 0.004*                       |
| <b>HD vs Base</b>        |                        |                         |                      |                        |                       |                              |                              |

319 \* Significant difference when applying linear mixed models,  $P < 0.05$ . IFN $\gamma$  (interferon gamma), KC-like (keratinocyte chemoattractant), MCP-1 (Monocyte  
320 chemoattractant protein 1), IL (Interleukin), GM-CSF (granulocyte-macrophage colony-stimulating factor) and TNF $\alpha$  (tumor necrosis factor alpha).



## 321 **Discussion**

322 Our study was the first to evaluate kinetics of markers of inflammation over the course of infection  
323 and recovery in a canine model experimentally infected with *Babesia rossi*. The results of this study  
324 illustrate the key role cytokines play in initiating and perpetuating inflammation in this disease and  
325 has also demonstrated that a pronounced inflammatory response continues and may even worsen  
326 despite clearance of the parasitemia. In addition to these findings the influence of inoculum dose was  
327 demonstrated, with a high infectious dose leading to an earlier onset of disease development and  
328 resulted in a more fulminant form of the disease. All the findings agreed with our original hypotheses,  
329 providing some insights into the pathogenesis of this hemolytic disease and even shedding additional  
330 light on the influence of treatment on the progression of the inflammatory response.

331 A progressive decline in both habitus and appetite was associated with higher infectious dose, rising  
332 parasitemia and worsening disease, improving with resolution of inflammation. As such, these clinical  
333 parameters can act as good indicators of disease onset and resolution. Although not statistically  
334 significant, there was a tendency for rectal temperature to increase with increasing parasitemia. The  
335 inoculum dose influenced the onset of changes in temperature, heart rate and respiratory rate in this  
336 study, with the HD group demonstrating increases 24 to 36 hours earlier than the LD group. Similar  
337 findings were seen in the experimental infection of dogs with *B. canis* (20). One dog in the HD group  
338 demonstrated a marked reduction in rectal temperature of 2.8°C at 96 hours, followed shortly  
339 thereafter by collapse and death. In a recent study of dogs naturally infected with *B. rossi*, rectal  
340 temperatures were significantly lower in dogs that presented collapsed with both collapse and  
341 hypothermia being positively associated with an increased risk of death (2). Rectal temperature may  
342 act as a proxy for the onset and progression of inflammation as well as the onset of hypoperfusion and  
343 shock. The blood pressure changes seen in our study differed from those seen during an experimental  
344 infection of dogs with *B. canis*, where the mean arterial blood pressure, measured using a non-  
345 invasive oscillometric blood pressure meter, declined progressively after inoculation (20). Mild  
346 hypotension was only identified in the one dog that died at 96 hours from the HD group. In previous

347 studies hypotension worsened with disease severity (20, 21). The absence of hypotension in the  
348 remaining dogs in our study may be due to the short duration of the experiment and the timing of  
349 treatment. If the infection had been allowed to progress beyond our endpoints, we may have identified  
350 hypotension in more dogs.

351 High parasitemia is positively associated with increased risk of complications and death in *B. rossi*  
352 infections (14, 19). Venous parasitemia's up to 30% have been recorded in natural *B. rossi* infections  
353 and this may be a contributor to the virulence of this *Babesia* species (19, 22). As with previous  
354 studies on *B. rossi* infection, we demonstrated a progressive parasitemia which required  
355 chemotherapeutic intervention. The infectious dose had a prominent impact on the progression of  
356 parasitemia with levels increasing at a significant rate and to very high levels in the HD group, up to  
357 59%, within 4 days of inoculation. The LD group demonstrated a more gradual rise in parasitemia,  
358 more closely mirroring natural infection. The immune system may be overwhelmed and unable to  
359 mount an effective and timely response to the *B. rossi* parasites when faced with high infectious  
360 doses or it is possible that these parasites actively suppress effective immune responses which may be  
361 more effectively suppressed at a higher parasitemia. The concept of an ineffective immune response  
362 may be supported by the positive correlation identified between parasitemia and IL-10, a prominent  
363 anti-inflammatory cytokine. Immune evasion by protozoa is a well-known phenomenon and has been  
364 demonstrated in *Plasmodium*, *Trypanosoma* and *Leishmania* among others (23). In *Leishmania*  
365 infections, the parasites promote an immunosuppressive cytokine profile with high levels of IL-10,  
366 allowing them unrestricted replication (23) and a similar interaction may take place in *B. rossi*  
367 infections. Immune dysregulation with concurrent hyperinflammation and immunosuppression is  
368 ubiquitous in human patients that are critically ill (24-26). It is also possible that, as in sepsis in  
369 humans, there is a state of hyperinflammation that is ineffective at clearing the infection but  
370 nevertheless does damage the host. The negative correlation between parasitemia and mature  
371 neutrophil count may also point to a deficient innate immune response to the *B. rossi* infection in  
372 these dogs. In addition to low neutrophil numbers a recent study on neutrophil function in *B. rossi*  
373 infections also identified an association between higher concentrations of neutrophil myeloperoxidase

374 concentrations and poor prognosis suggesting possible diminished neutrophil burst function in the  
375 remaining neutrophils (27). It has also been shown that *B. rossi* results in significant lymphopenia as a  
376 result of a loss of CD3<sup>+</sup>, CD4<sup>+</sup>, CD8<sup>+</sup> and CD21<sup>+</sup> phenotypes (28). The degree of lymphocyte loss was  
377 also correlated to disease severity, and this may be responsible for a state of immune dysfunction  
378 despite hyperinflammation (28). Timing of treatment relative to parasitemia concentrations may have  
379 a marked influence on the degree of cytokine response after treatment, with cytokines such as TNF $\alpha$ ,  
380 GM-CSF, IL-2 and IL-7 demonstrating marked increases after the parasites were damaged/killed by  
381 the treatment in the HD group with mild to moderate increases in the LD group. Higher parasitemia at  
382 the time of treatment may result in a more severe, unregulated pro-inflammatory response after  
383 treatment. Damage to the parasites releases soluble parasite antigens into circulation which could be  
384 efficient in stimulating this profound immune response. Although this response may increase the rate  
385 of *B. rossi* parasite clearance, it could be redundant and lead to unnecessary widespread ‘innocent  
386 bystander’ injury to host tissues.

387 Anemia is common in dogs infected with *B. rossi* and in a recent study up to 84% of dogs had  
388 hematocrits below the laboratory reference interval at presentation (2). Although anemia is not a  
389 reliable predictor of death, severe anemia does require treatment to avoid the systemic complications  
390 of hypoxia and even death (2). The HD group demonstrated a significant anemia at 96 hours after  
391 inoculation which worsened after treatment requiring multiple blood transfusions. The severity of the  
392 anemia after treatment in this group was likely underestimated as a result of this intervention.

393 Although the decline in Hct was significant in the LD group after treatment, it only resulted in mild  
394 anemia in these dogs and blood transfusions were not necessary. The absence of anemia during active  
395 infection in the LD group was probably the result of insufficient time permitted for disease  
396 progression to reach the same severity as that seen in the HD group. A marked decline in hematocrit  
397 occurred after treatment in both groups similar to previous studies (29).

398 Mature neutropenia was identified as early as 24 hours post-inoculation in the HD group, but only  
399 reached statistical significance from 72 hours. The mature neutropenia persisted until treatment,  
400 thereafter, counts increased significantly above baseline and laboratory references intervals. A mature

401 neutropenia was seen in the LD group, 36-hours after the HD group, but neutrophilia did not develop  
402 after treatment. Previous studies evaluating hematological changes in natural *B. rossi* infections found  
403 that a large percentage of dogs present with a neutropenia (27, 30). A progressive band neutrophilia  
404 was seen in the HD group after treatment and band neutrophilia in *B. rossi* infections has been  
405 associated with lower hematocrits and blood transfusions, consistent with findings in our study (30).  
406 A band neutrophil count of  $> 0.5 \times 10^9/L$  at presentation carries an odds ratio for death of 5.9 (2).  
407 Interestingly the only dog with a band neutrophil count above this level prior to treatment in our study  
408 was the dog that died. In one study there was a higher proportion of dogs with a neutrophilia in the  
409 group that received blood transfusions (30). The blood transfusions received by the HD group may  
410 have contributed to the left shift neutrophilia but hemolysis and subsequent increases in cytokine  
411 release and systemic inflammation are likely the main role players. There was a strong negative  
412 correlation between mature neutrophil count and KC-like, a cytokine with a major role in neutrophil  
413 migration and activation (31). Interleukin-8, another important cytokine in the migration and  
414 activation of neutrophils, had a peak concentration at 96 hours in the HD group, coinciding with the  
415 mature neutrophil nadir (32). The migration of neutrophils, under the influence of cytokine cues, out  
416 of circulation to various sites of inflammation may contribute to the circulating neutropenia seen in *B.*  
417 *rossi* infections. The cytokine, GM-CSF, stimulates the initiation of granulopoiesis in the bone  
418 marrow, and this cytokine increased after treatment, particularly in the HD group, coinciding with  
419 increases in neutrophil and monocyte counts (33). The HD group developed a mild monocytosis after  
420 treatment, similar to natural *B. rossi* infections (30). It should be noted that *B. rossi* infected dogs  
421 demonstrate monocyte/macrophage accumulation in the pulmonary interstitium and spleen (34, 35). A  
422 large increase in MCP-1 after treatment in the HD group indicates increased demand for  
423 monocyte/macrophage activity during this period and GM-CSF may have provided the bone marrow  
424 stimulation to increase production of monocytes after treatment (33, 36).

425 Acute phase proteins are regularly used in the detection and monitoring of systemic inflammation. C-  
426 reactive protein is an acute phase protein that is consistently elevated in canine babesiosis despite  
427 levels not correlating with outcome (15, 20, 37). In one study of CRP in natural *B. canis* infection,

428 CRP had its peak concentration at presentation and declined progressively following treatment (37).  
429 In a *B. canis* experimental infection, CRP increased before the presence of a detectable parasitemia  
430 and the onset of the increase was inoculum dose dependent with the highest dose resulting in  
431 increased concentrations first (20). The inoculum dose in our study influenced the onset of increases  
432 in CRP concentration with the HD group showing a significant increases 36 hours earlier than the LD  
433 group. Low levels of parasitemia were detectable prior to significant increases in CRP concentrations  
434 in both groups unlike findings in experimental *B. canis* infection (20). This may however not have  
435 been the case had lower infectious doses been used. Treatment resulted in a progressive decline in  
436 CRP concentrations in both groups. Although CRP increased with parasitemia the correlation wasn't  
437 statistically significant in this small cohort, but rectal temperature and CRP were positively correlated.  
438 As seen in the *B. canis* experimental study, CRP concentrations in our study reached a ceiling and  
439 remained relatively stable despite progressive parasitemia (20). C-reactive protein levels remained  
440 high even after parasitemia was undetectable and this delay was most likely due to the half-life (which  
441 is approximately 161 hours in dogs, with significant inter-individual variation) rather than continued  
442 production (38).

443 Cytokines are a group of proteins secreted by cells of the immune system which act as key signalling  
444 molecules in any inflammatory response. A number of cytokine changes have been identified in *B.*  
445 *rossi* infections, but these have only been evaluated in dogs at presentation, providing a single snap  
446 shot in time of a complicated and dynamic disease (13, 14). Cytokines shown to increase during *B.*  
447 *rossi* infections include IL-6, IL-10, MCP-1 and TNF $\alpha$ , and their concentrations tended to be higher in  
448 dogs with complicated disease (13, 14). Only IL-6 and IL-10 concentrations were significantly higher  
449 in dogs that died compared to survivors (13). Decreased concentrations of IL-8 were consistently  
450 identified in natural *B. rossi* infections, in contrast to *B. canis* infections (13, 14, 16).

451 Interferon gamma and KC-like increased with the start of infection and declined after treatment. These  
452 cytokines seem to be released by the host in an attempt to control the parasite biomass similar to the  
453 IFN $\gamma$  response seen in falciparum malaria (39). In malaria, IFN $\gamma$  is considered an important mediator  
454 in the protective innate immune response during the blood stage and initial parasite replication (40). It

455 is possible that IFN $\gamma$  is important in the initial immune response to *B. rossi* infection, suppressing early  
456 replication of the parasite as this cytokine increased early in the course of the experimental infection,  
457 coinciding with the initial increase in parasitemia in both groups. The concentrations, however, declined  
458 acutely once the parasitemia exceeded 5% in HD group. The sudden decline in IFN $\gamma$  concentrations in  
459 the HD group coincided with a marked increase in parasitemia. The high levels of parasitemia seen in  
460 the HD group may have induced a state of immune exhaustion (41). High concentrations of IL-10 may  
461 also have contributed to the sudden decline in IFN $\gamma$ , thereby suppressing its secretion and contributing  
462 to the resultant unregulated parasite replication (42-44). Suppression of IFN $\gamma$  secretion may be one  
463 mechanism employed by the parasite allowing unrestrained increase in parasite biomass and it is  
464 possible that a similar decline may have been seen in the LD group if infection had been allowed to  
465 evolve. Keratinocyte chemoattractant-like increases in *B. gibsoni* and *B. canis* infections, and high  
466 concentrations were able to differentiate complicated from uncomplicated *B. canis* cases (16). In our  
467 study KC-like increased progressively during infection and declined following treatment, correlating  
468 strongly to parasitemia. In addition to promoting neutrophil migration, KC-like may contribute to  
469 increased risk of complications because of enhanced neutrophil release of reactive oxygen species and  
470 neutrophil extracellular traps, important mechanisms by which host tissue may be damaged (45).

471 Cytokine increases after treatment could reflect a role in the ‘run-away’ inflammation that persists even  
472 after the initial trigger has been removed. Two pro-inflammatory cytokines, MCP-1 and IL-6 had a  
473 similar pattern of change and showed a strong positive correlation with one another. Both cytokines  
474 displayed progressive increases from the point of inoculation increasing markedly after treatment in the  
475 HD group. No significant increases were noted in the LD group throughout the study period, but  
476 concentrations of MCP-1 were trending upwards 24 hours prior to treatment. In previous studies on  
477 natural *B. rossi* infections MCP-1 and IL-6 were increased in infected dogs at presentation and higher  
478 concentrations were associated with increased risk of mortality (13, 14). The concentrations of MCP-1  
479 and IL-6 in the dog that died were considerably higher than any other dog in our study just prior to  
480 treatment indicative of a negative prognosis. Monocyte chemoattractant protein-1 recruits and activates  
481 monocytes/macrophages and would be a vital host mechanism in the immune response to babesia

482 parasites by amplifying inflammatory signals and enhancing phagocytosis of parasites and damaged  
483 erythrocytes (36). Persistently high levels however could contribute to an unregulated inflammatory  
484 response and increased risk of complications such as acute lung injury seen in some dogs that die as a  
485 result of *B. rossi* infection (34). A potent stimulator of IL-6 production is TNF $\alpha$ , and a strong positive  
486 correlation was detected between IL-6 and TNF $\alpha$  in this study. The role of IL-6 in septic conditions is  
487 poorly understood, although it does play a role in many pro-inflammatory activities such as stimulating  
488 the production of acute phase proteins like CRP from hepatocytes (well known to be raised in *B. rossi*  
489 infection), activation of lymphocytes and acting as a pyrogen (15, 46). Interleukin-6 is also thought to  
490 link inflammation with thrombosis in sepsis (46, 47). Widespread formation of microthrombi is a well-  
491 defined pathology in canine babesiosis, particularly in *B. rossi* infections, and increases in IL-6 may be  
492 an important trigger for this, contributing to increased risk of complications such as cerebral babesiosis,  
493 myocardial dysfunction and death (48-50). Interleukin-6 is also shown to play an important role in the  
494 acute endocrine response to infection which is well described and so typical of this disease (51-53).

495 In previous studies on the cytokine changes in *B. rossi* infections, IL-8 was decreased at presentation  
496 when compared to healthy control dogs (13, 14). In contrast to these findings, IL-8 increases in *B. canis*  
497 infections and even showed a progressive rise for at least 7 days after treatment (16). Our study  
498 demonstrated decreased IL-8 concentrations during the early stages of infection in the HD group  
499 followed by a considerable increase shortly before treatment, when parasitemia was very high.  
500 Interleukin 8 concentrations remained high after treatment in this group. A mild transient increase in  
501 IL-8 concentrations was noted in the LD group 24-hours after infection, followed by a progressive  
502 decline in concentrations until treatment. Once treated, IL-8 concentrations increased progressively  
503 until 192 hours in this group. The decline in IL-8 production in *B. rossi* infections is poorly understood  
504 but because this cytokine is not constitutively produced and requires inflammatory stimulus, it is  
505 possible that in the early stages of infection, before parasitemia and hemolysis are severe, there is  
506 insufficient stimulus (32). Suppression of IL-8 and the cytokines that stimulate its production (TNF $\alpha$   
507 and IL-1) during the initial phase of infection may be, in part, due to high concentrations of IL-10 (32,  
508 54). The final cytokine in this group, IL-10, is a prominent anti-inflammatory cytokine. Concentrations



509 of IL-10 progressively increased over the course of the experimental infection and decreased gradually  
510 after treatment. High IL-10 concentrations have been noted in natural *B. rossi* infections (13, 14).  
511 Interleukin-10 is essential in the modulation of the inflammatory response and plays a key role in  
512 preventing excessive inflammation as well as promoting the resolution of inflammation once the  
513 inciting pathogen has been eliminated (54). Although the anti-inflammatory effects of IL-10 are critical,  
514 excessive or inappropriately timed production of IL-10 may prevent an effective immune response to  
515 an organism, allowing persistence or even unregulated replication in the host (54). This has been seen  
516 in *Leishmania spp.* and *Plasmodium spp.* infections in which high IL-10 concentrations can lead to  
517 fulminant fatal infections or chronic persistent infections (54). Human septic patients with continuous  
518 over production of IL-10 and high IL-10:TNF $\alpha$  ratio develop marked immunosuppression and have a  
519 higher risk of mortality (55). A strong positive correlation was seen between IL-10 and parasitemia  
520 supporting the notion that IL-10 may have a permissive effect on the replication of *B. rossi* parasites.

521 The cytokines GM-CSF, TNF $\alpha$ , IL-2 and IL-7 only increased significantly after treatment. Increased  
522 levels of GM-CSF have been identified in *B. rossi* infections, particularly in dogs presented earlier in  
523 the course of disease (13). The rise in GM-CSF concentrations after treatment noted in our study may  
524 act as a double-edged sword, on the one side replenishment of neutrophil and monocyte counts is  
525 essential but on the other, excess production, adhesion and activation of granulocytes and macrophages  
526 after the parasites are eliminated may contribute to widespread tissue damage (33). The initiator pro-  
527 inflammatory cytokine TNF $\alpha$  is one of the most studied cytokines in human medicine and is an  
528 important mediator in the protection against microbial infections (56). It can however lead to pathology  
529 in cases where there is disproportionate and dysregulated immune response to an infection by the host  
530 (56). It is also a potent stimulator of the production of other pro-inflammatory cytokines such as IL-1 $\beta$ ,  
531 IL-6 and IL-8, serving as co-ordinator in the inflammatory response (46). Increased concentrations  
532 were found in natural *B. rossi* infections and higher levels were associated with increased risk of  
533 complicated disease and death (14). Concentrations of TNF $\alpha$  were only increased after treatment in this  
534 study and reached very high levels in one dog in the HD group. There was also a strong positive  
535 correlation with IL-6, GM-CSF, IL-2 and IL-7. The excessive production of TNF $\alpha$  following treatment



536 may be indicative of a dysregulated immune response. Both IL-2 and IL-7 act on lymphocytes and were  
537 positively correlated with each other in this study (57, 58). Interleukin-2 did not increase when *B. rossi*  
538 infected dogs were compared to healthy control dogs in one study but higher concentrations were noted  
539 in infected dogs presented within 48 hours of clinical illness (13, 14). Increases in IL-7 has not been  
540 identified in previous studies of *B. rossi* infections (14). Both cytokines only displayed significant  
541 increases after treatment in the current study. Previously, significant reduction in T-helper lymphocytes  
542 and cytotoxic T-lymphocytes were identified in complicated *B. rossi* infections and decreased  
543 concentrations of cytotoxic T-lymphocytes was also noted in uncomplicated cases at presentation (28).  
544 In that study it was hypothesised that a state of functional immune suppression may be present, and this  
545 is supported by the apparent deficiency of cytokines involved in lymphocyte proliferation and activation  
546 identified in our study prior to treatment (28). Treatment and subsequent lysis of the parasites may have  
547 interrupted the immunosuppressive state and the release of soluble antigens was able to stimulate the  
548 adaptive immune response triggering production of these cytokines.

549  
550 Three cytokines showed no distinct pattern of change or only demonstrated changes in one dog. A  
551 strong positive correlation was identified between IL-15 and IL-18 in this study. Both these cytokines  
552 only increased significantly in one dog in the LD group after treatment. A trend in the increase of IL-  
553 15 concentrations early on in disease course of *B. rossi* infection was identified in one study (13). In  
554 the current study IP-10 concentrations were mildly increased in both groups.

555  
556 The main limitation of this study was the small sample size. Six dogs we were used in the study, with  
557 only 5 dogs being inoculated. Every attempt was made to exclude any confounding or influencing  
558 factors. All dogs were the same age, sex and breed with identical vaccination and deworming  
559 protocols. They were housed in the same isolation housing and outdoor facilities. Diet, training,  
560 experimental procedures, sample collection and human interaction was consistent between all dogs.  
561 Due to the small sample size, it is possible that significant differences between the groups may have  
562 been missed (type 2 error).

563

564 Our study has found that infectious dose influenced the onset and dynamics of the inflammatory  
565 response. Most variables shared similar kinetic patterns between groups, differing with respect to the  
566 timing of the onset of disease only. If the infection in the LD group had been allowed to progress, it is  
567 likely these variables would have reached similar degrees of change to those seen HD group. There  
568 were however exceptions, where kinetic patterns differed during infection between the two groups  
569 such as those seen in IL-8. Concentrations of CRP, KC-like, IL-15, IL-18 and IP-10 in the LD group  
570 exceeded those of the HD group after treatment. These findings suggest that not only will infectious  
571 dose influence the onset of inflammation, but it may influence the kinetics and nature of the  
572 inflammatory response to *B. rossi* infection. Moreover, the level of parasitemia may be a contributor  
573 to the development of complications after treatment. We also highlighted the influence  
574 chemotherapeutic damage to the parasites had on the progression of the inflammatory response. We  
575 found that not only was treatment unsuccessful in curbing the inflammatory response, but it may  
576 augment it by triggering the production of several pro-inflammatory cytokines and proliferation of  
577 inflammatory cells. Progression of the inflammatory response after treatment would be redundant and  
578 may even lead to unnecessary host tissue damage. It is clear from the findings of our study that *B.*  
579 *rossi* infection and treatment triggers a classical ‘cytokine storm’ in which the host’s response is  
580 characterized by severe inflammation and tissue damage beyond that induced by the parasite itself (9,  
581 59).

582

### 583 Acknowledgements

584 **Melvyn Quan**

585 Department of Veterinary Tropical Diseases, Faculty of Veterinary Science, University of Pretoria,  
586 Pretoria, South Africa

587 Contributions: Assistance in the running of the cytokine analysis.

588

589 References

- 590 1. Schoeman JP. Canine babesiosis. *Onderstepoort J Vet Res.* 2009;76(1):59-66.
- 591 2. Leisewitz AL, Goddard A, Clift S, Thompson PN, de Gier J, Van Engelshoven J, et al. A  
592 clinical and pathological description of 320 cases of naturally acquired *Babesia rossi* infection in  
593 dogs. *Vet Parasitol.* 2019;271:22-30.
- 594 3. Penzhorn BL. Why is Southern African canine babesiosis so virulent? An evolutionary  
595 perspective. *parasites & vectors* [Internet]. 2011; 4(1):[51 p.].
- 596 4. Jacobson LS, Clark IA. The pathophysiology of canine babesiosis: new approaches to an old  
597 puzzle. *J S Afr Vet Assoc.* 1994;65(3):134-45.
- 598 5. Jacobson LS. The South African form of severe and complicated canine babesiosis: clinical  
599 advances 1994-2004. *Vet Parasitol.* 2006;138(1-2):126-39.
- 600 6. Bone RC, Balk RA, Cerra FB, Dellinger RP, Fein AM, Knaus WA, et al. Definitions for  
601 Sepsis and Organ Failure and Guidelines for the Use of Innovative Therapies in Sepsis. *Chest.*  
602 1992;101(6):1644-55.
- 603 7. Jacobson LS, Lobetti RG, Becker P, Reyers F, Vaughan-Scott T. Nitric oxide metabolites in  
604 naturally occurring canine babesiosis. *Vet Parasitol.* 2002;104(1):27-41.
- 605 8. Clark IA, Budd AC, Alleva LM, Cowden WB. Human malarial disease: a consequence of  
606 inflammatory cytokine release. *Malar J.* 2006;5:85.
- 607 9. Clark IA. The advent of the cytokine storm. *Immunol Cell Biol.* 2007;85(4):271-3.
- 608 10. Clark IA, al Yaman FM, Jacobson LS. The biological basis of malarial disease. *Int J Parasitol.*  
609 1997;27(10):1237-49.
- 610 11. Reyers F, Leisewitz AL, Lobetti RG, Milner RJ, Jacobson LS. Canine babesiosis in South  
611 Africa: more than one disease. Does this serve as a model for falciparum malaria. *Annals of Tropical*  
612 *Medicine and Parasitology.* 1998;92(4):503-11.
- 613 12. A. Clark L. S. Jacobson I. Do babesiosis and malaria share a common disease process. *Annals*  
614 *of Tropical Medicine And Parasitology.* 1998;92(4):483-8.
- 615 13. Goddard A, Leisewitz AL, Kjelgaard-Hansen M, Kristensen AT, Schoeman JP. Excessive  
616 Pro-Inflammatory Serum Cytokine Concentrations in Virulent Canine Babesiosis. *PLoS One.*  
617 2016;11(3):e0150113.
- 618 14. Leisewitz A, Goddard A, De Gier J, Van Engelshoven J, Clift S, Thompson P, et al. Disease  
619 severity and blood cytokine concentrations in dogs with natural *Babesia rossi* infection. *Parasite*  
620 *Immunol.* 2019;41(7):e12630.
- 621 15. Koster LS, Van Schoor M, Goddard A, Thompson PN, Matjila PT, Kjelgaard-Hansen M. C-  
622 reactive protein in canine babesiosis caused by *Babesia rossi* and its association with outcome. *J S Afr*  
623 *Vet Assoc.* 2009;80(2):87-91.
- 624 16. Galán A, Mayer I, Rafaj RB, Bendelja Ko, Sušić V, Cerón JJn, et al. MCP-1, KC-like and IL-  
625 8 as critical mediators of pathogenesis caused by *Babesia canis*. *PLOS ONE.* 2018;13(1):e0190474.
- 626 17. Zygnier W, Gojska-Zygnier O, Baska P, Dlugosz E. Increased concentration of serum TNF  
627 alpha and its correlations with arterial blood pressure and indices of renal damage in dogs infected  
628 with *Babesia canis*. *Parasitol Res.* 2014;113(4):1499-503.
- 629 18. Brown AL, Shiel RE, Irwin PJ. Clinical, haematological, cytokine and acute phase protein  
630 changes during experimental *Babesia gibsoni* infection of beagle puppies. *Experimental Parasitology.*  
631 2015;157:185-96.
- 632 19. Bohm M, Leisewitz AL, Thompson PN, Schoeman JP. Capillary and venous *Babesia canis*  
633 *rossi* parasitaemias and their association with outcome of infection and circulatory compromise. *Vet*  
634 *Parasitol.* 2006;141(1-2):18-29.
- 635 20. Schettters TP, Kleuskens JA, Van De Crommert J, De Leeuw PW, Finizio AL, Gorenflot A.  
636 Systemic inflammatory responses in dogs experimentally infected with *Babesia canis*; a  
637 haematological study. *Vet Parasitol.* 2009;162(1-2):7-15.
- 638 21. Jacobson LS, Lobetti RG, Vaughan-Scott T. Blood pressure changes in dogs with babesiosis.  
639 *J S Afr Vet Assoc.* 2000;71(1):14-20.

- 640 22. Schetters TP, Moubri K, Cooke BM. Comparison of *Babesia rossi* and *Babesia canis* isolates  
641 with emphasis on effects of vaccination with soluble parasite antigens: a review. *J S Afr Vet Assoc.*  
642 2009;80(2):75-8.
- 643 23. Morrot A. Immune Evasion Strategies in Protozoan-Host Interactions. *Frontiers in*  
644 *Immunology.* 2020;11.
- 645 24. van der Poll T, van de Veerdonk FL, Scicluna BP, Netea MG. The immunopathology of  
646 sepsis and potential therapeutic targets. *Nat Rev Immunol.* 2017;17(7):407-20.
- 647 25. Matthay MA, Zemans RL, Zimmerman GA, Arabi YM, Beitler JR, Mercat A, et al. Acute  
648 respiratory distress syndrome. *Nat Rev Dis Primers.* 2019;5(1):18.
- 649 26. Mira JC, Brakenridge SC, Moldawer LL, Moore FA. Persistent Inflammation,  
650 Immunosuppression and Catabolism Syndrome. *Crit Care Clin.* 2017;33(2):245-58.
- 651 27. Celliers A, Rautenbach Y, Hooijberg E, Christopher M, Goddard A. Neutrophil  
652 Myeloperoxidase Index in Dogs With Babesiosis Caused by *Babesia rossi*. *Front Vet Sci.* 2020;7:72.
- 653 28. Rautenbach Y, Goddard A, Thompson PN, Mellanby RJ, Leisewitz AL. A flow cytometric  
654 assessment of the lymphocyte immunophenotypes in dogs naturally infected with *Babesia rossi*. *Vet*  
655 *Parasitol.* 2017;241:26-34.
- 656 29. Jacobson LS, Reyers F, Berry WL, Viljoen E. Changes in haematocrit after treatment of  
657 uncomplicated canine babesiosis: a comparison between diminazene and trypan blue, and an  
658 evaluation of the influence of parasitaemia. *J S Afr Vet Assoc.* 1996;67(2):77-82.
- 659 30. Scheepers E. The haematological kinetics of canine babesiosis in South Africa 2013.
- 660 31. Ritzman AM, Hughes-Hanks JM, Blaho VA, Wax LE, Mitchell WJ, Brown CR. The  
661 chemokine receptor CXCR2 ligand KC (CXCL1) mediates neutrophil recruitment and is critical for  
662 development of experimental Lyme arthritis and carditis. *Infect Immun.* 2010;78(11):4593-600.
- 663 32. Harada A, Sekido N, Akahoshi T, Wada T, Mukaida N, Matsushima K. Essential involvement  
664 of interleukin-8 (IL-8) in acute inflammation. *J Leukoc Biol.* 1994;56(5):559-64.
- 665 33. Hamilton JA. GM-CSF in inflammation and autoimmunity. *Trends Immunol.*  
666 2002;23(8):403-8.
- 667 34. Martin CA. Pathology of complicated *Babesia rossi*-associated acute lung injury and  
668 respiratory distress syndrome in dogs: University of Pretoria; 2020.
- 669 35. Henning A, Clift SJ, Leisewitz AL. The pathology of the spleen in lethal canine babesiosis  
670 caused by *Babesia rossi*. *Parasite Immunol.* 2020;42(5):e12706.
- 671 36. Deshmane SL, Kremlev S, Amini S, Sawaya BE. Monocyte chemoattractant protein-1 (MCP-  
672 1): an overview. *J Interferon Cytokine Res.* 2009;29(6):313-26.
- 673 37. Matijatko V, Mrljak V, Kis I, Kucer N, Forsek J, Zivicnjak T, et al. Evidence of an acute  
674 phase response in dogs naturally infected with *Babesia canis*. *Vet Parasitol.* 2007;144(3-4):242-50.
- 675 38. Kuribayashi T, Seita T, Momotani E, Yamazaki S, Hagimori K, Yamamoto S. Elimination  
676 Half-Lives of Acute Phase Proteins in Rats and Beagle Dogs During Acute Inflammation.  
677 *Inflammation.* 2015;38(4):1401-5.
- 678 39. King T, Lamb T. Interferon-gamma: The Jekyll and Hyde of Malaria. *PLoS Pathog.*  
679 2015;11(10):e1005118.
- 680 40. Malaguarnera L, Musumeci S. The immune response to *Plasmodium falciparum* malaria.  
681 *Lancet Infect Dis.* 2002;2(8):472-8.
- 682 41. Yadav H, Cartin-Ceba R. Balance between Hyperinflammation and Immunosuppression in  
683 Sepsis. *Semin Respir Crit Care Med.* 2016;37(1):42-50.
- 684 42. D'Andrea A, Aste-Amezaga M, Valiante NM, Ma X, Kubin M, Trinchieri G. Interleukin 10  
685 (IL-10) inhibits human lymphocyte interferon gamma-production by suppressing natural killer cell  
686 stimulatory factor/IL-12 synthesis in accessory cells. *J Exp Med.* 1993;178(3):1041-8.
- 687 43. Toliver-Kinsky TE, Varma TK, Lin CY, Herndon DN, Sherwood ER. Interferon-gamma  
688 production is suppressed in thermally injured mice: decreased production of regulatory cytokines and  
689 corresponding receptors. *Shock.* 2002;18(4):322-30.
- 690 44. Fiorentino DF, Zlotnik A, Mosmann TR, Howard M, O'Garra A. IL-10 inhibits cytokine  
691 production by activated macrophages. *J Immunol.* 1991;147(11):3815-22.
- 692 45. Jin L, Batra S, Douda DN, Palaniyar N, Jeyaseelan S. CXCL1 contributes to host defense in  
693 polymicrobial sepsis via modulating T cell and neutrophil functions. *J Immunol.* 2014;193(7):3549-  
694 58.

- 695 46. Blackwell TS, Christman JW. Sepsis and cytokines: current status. *Br J Anaesth.*  
696 1996;77(1):110-7.
- 697 47. Song M, Kellum JA. Interleukin-6. *Critical care medicine.* 2005;33(12 Suppl):463-5.
- 698 48. Pardini AD. The pathology and pathogenesis of canine cerebral babesiosis: University of  
699 Pretoria; 2010.
- 700 49. Dvir E, Lobetti RG, Jacobson LS, Pearson J, Becker PJ. Electrocardiographic changes and  
701 cardiac pathology in canine babesiosis. *J Vet Cardiol.* 2004;6(1):15-23.
- 702 50. Goddard A, Wiinberg B, Schoeman JP, Kristensen AT, Kjelgaard-Hansen M. Mortality in  
703 virulent canine babesiosis is associated with a consumptive coagulopathy. *Vet J.* 2013;196(2):213-7.
- 704 51. Schoeman JP, Rees P, Herrtage ME. Endocrine predictors of mortality in canine babesiosis  
705 caused by *Babesia canis rossi*. *Vet Parasitol.* 2007;148(2):75-82.
- 706 52. Karga H, Papaioannou P, Venetsanou K, Papandroulaki F, Karaloizos L, Papaioannou G, et  
707 al. The role of cytokines and cortisol in the non-thyroidal illness syndrome following acute  
708 myocardial infarction. *Eur J Endocrinol.* 2000;142(3):236-42.
- 709 53. Schoeman JP, Goddard A, Herrtage ME. Serum cortisol and thyroxine concentrations as  
710 predictors of death in critically ill puppies with parvoviral diarrhea. *J Am Vet Med Assoc.*  
711 2007;231(10):1534-9.
- 712 54. Couper KN, Blount DG, Riley EM. IL-10: the master regulator of immunity to infection. *J*  
713 *Immunol.* 2008;180(9):5771-7.
- 714 55. Chaudhry H, Zhou J, Zhong Y, Ali MM, McGuire F, Nagarkatti PS, et al. Role of cytokines  
715 as a double-edged sword in sepsis. *In Vivo.* 2013;27(6):669-84.
- 716 56. Idriss HT, Naismith JH. TNF alpha and the TNF receptor superfamily: structure-function  
717 relationship(s). *Microsc Res Tech.* 2000;50(3):184-95.
- 718 57. Gaffen SL, Liu KD. Overview of interleukin-2 function, production and clinical applications.  
719 *Cytokine.* 2004;28(3):109-23.
- 720 58. Hofmeister R, Khaled AR, Benbernou N, Rajnavolgyi E, Muegge K, Durum SK. Interleukin-  
721 7: physiological roles and mechanisms of action. *Cytokine Growth Factor Rev.* 1999;10(1):41-60.
- 722 59. Clark IA, Alleva LM, Budd AC, Cowden WB. Understanding the role of inflammatory  
723 cytokines in malaria and related diseases. *Travel medicine and infectious disease.* 2008;6(1-2):67-81.

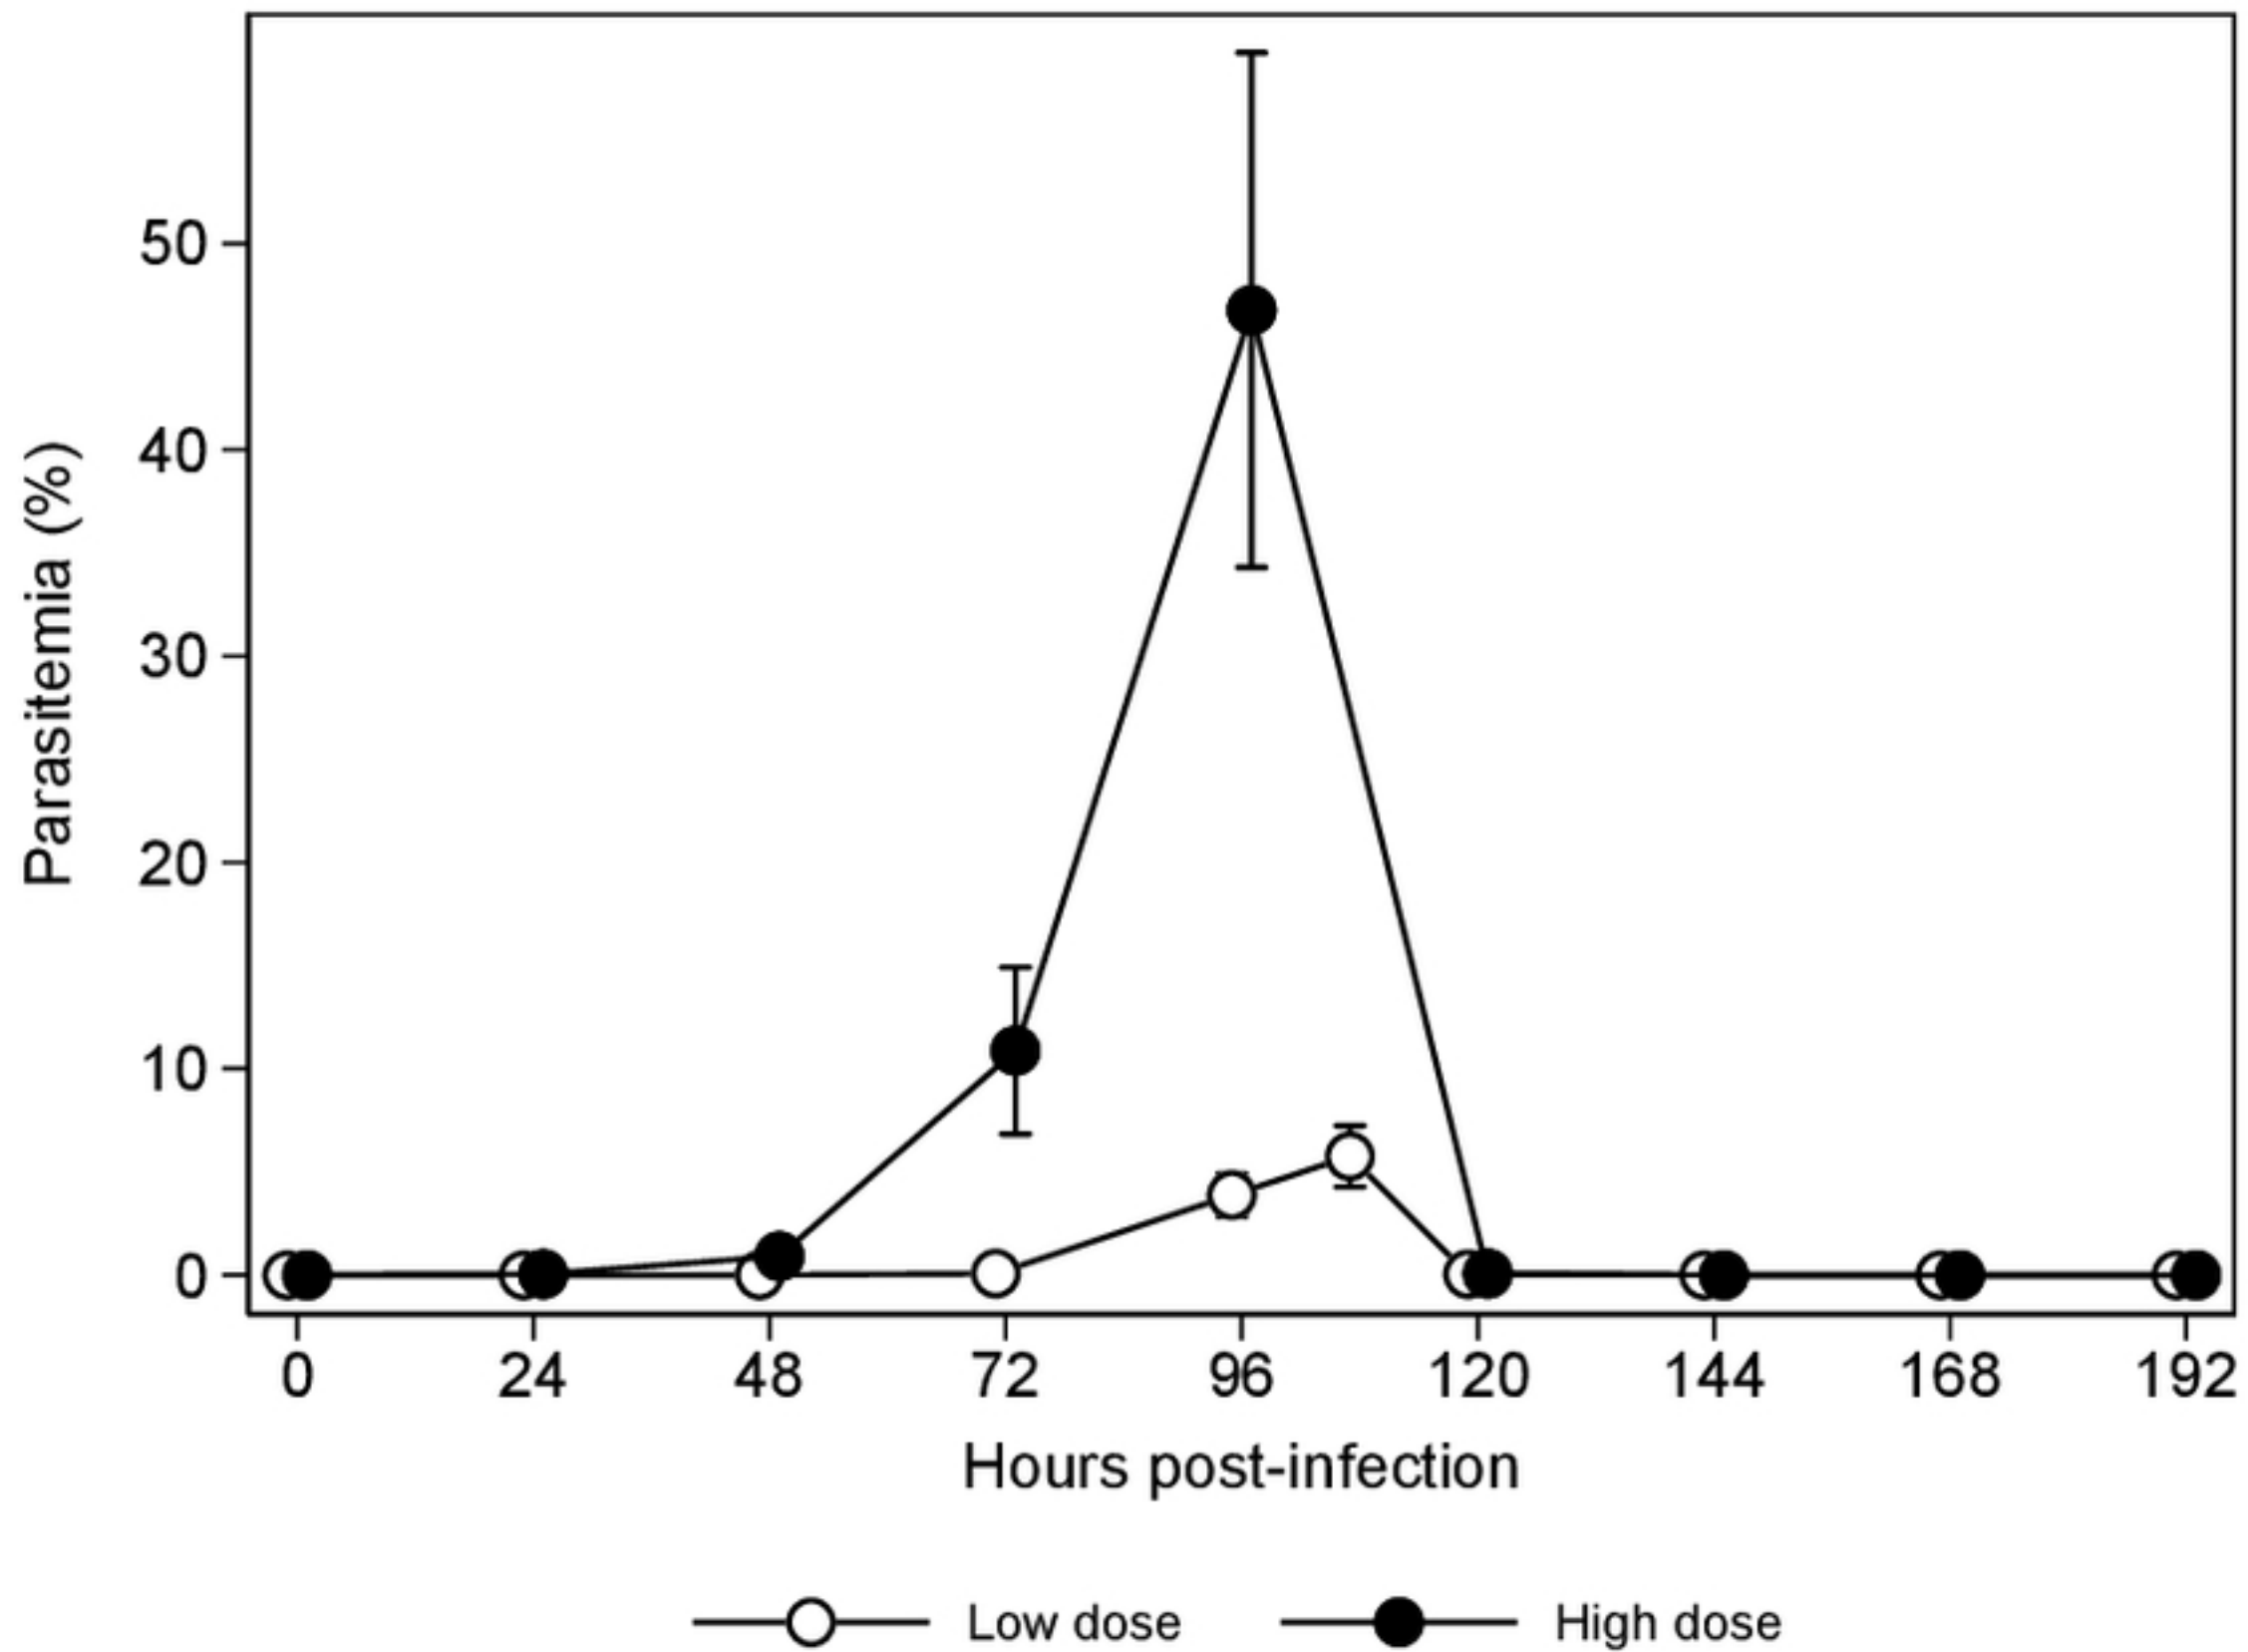

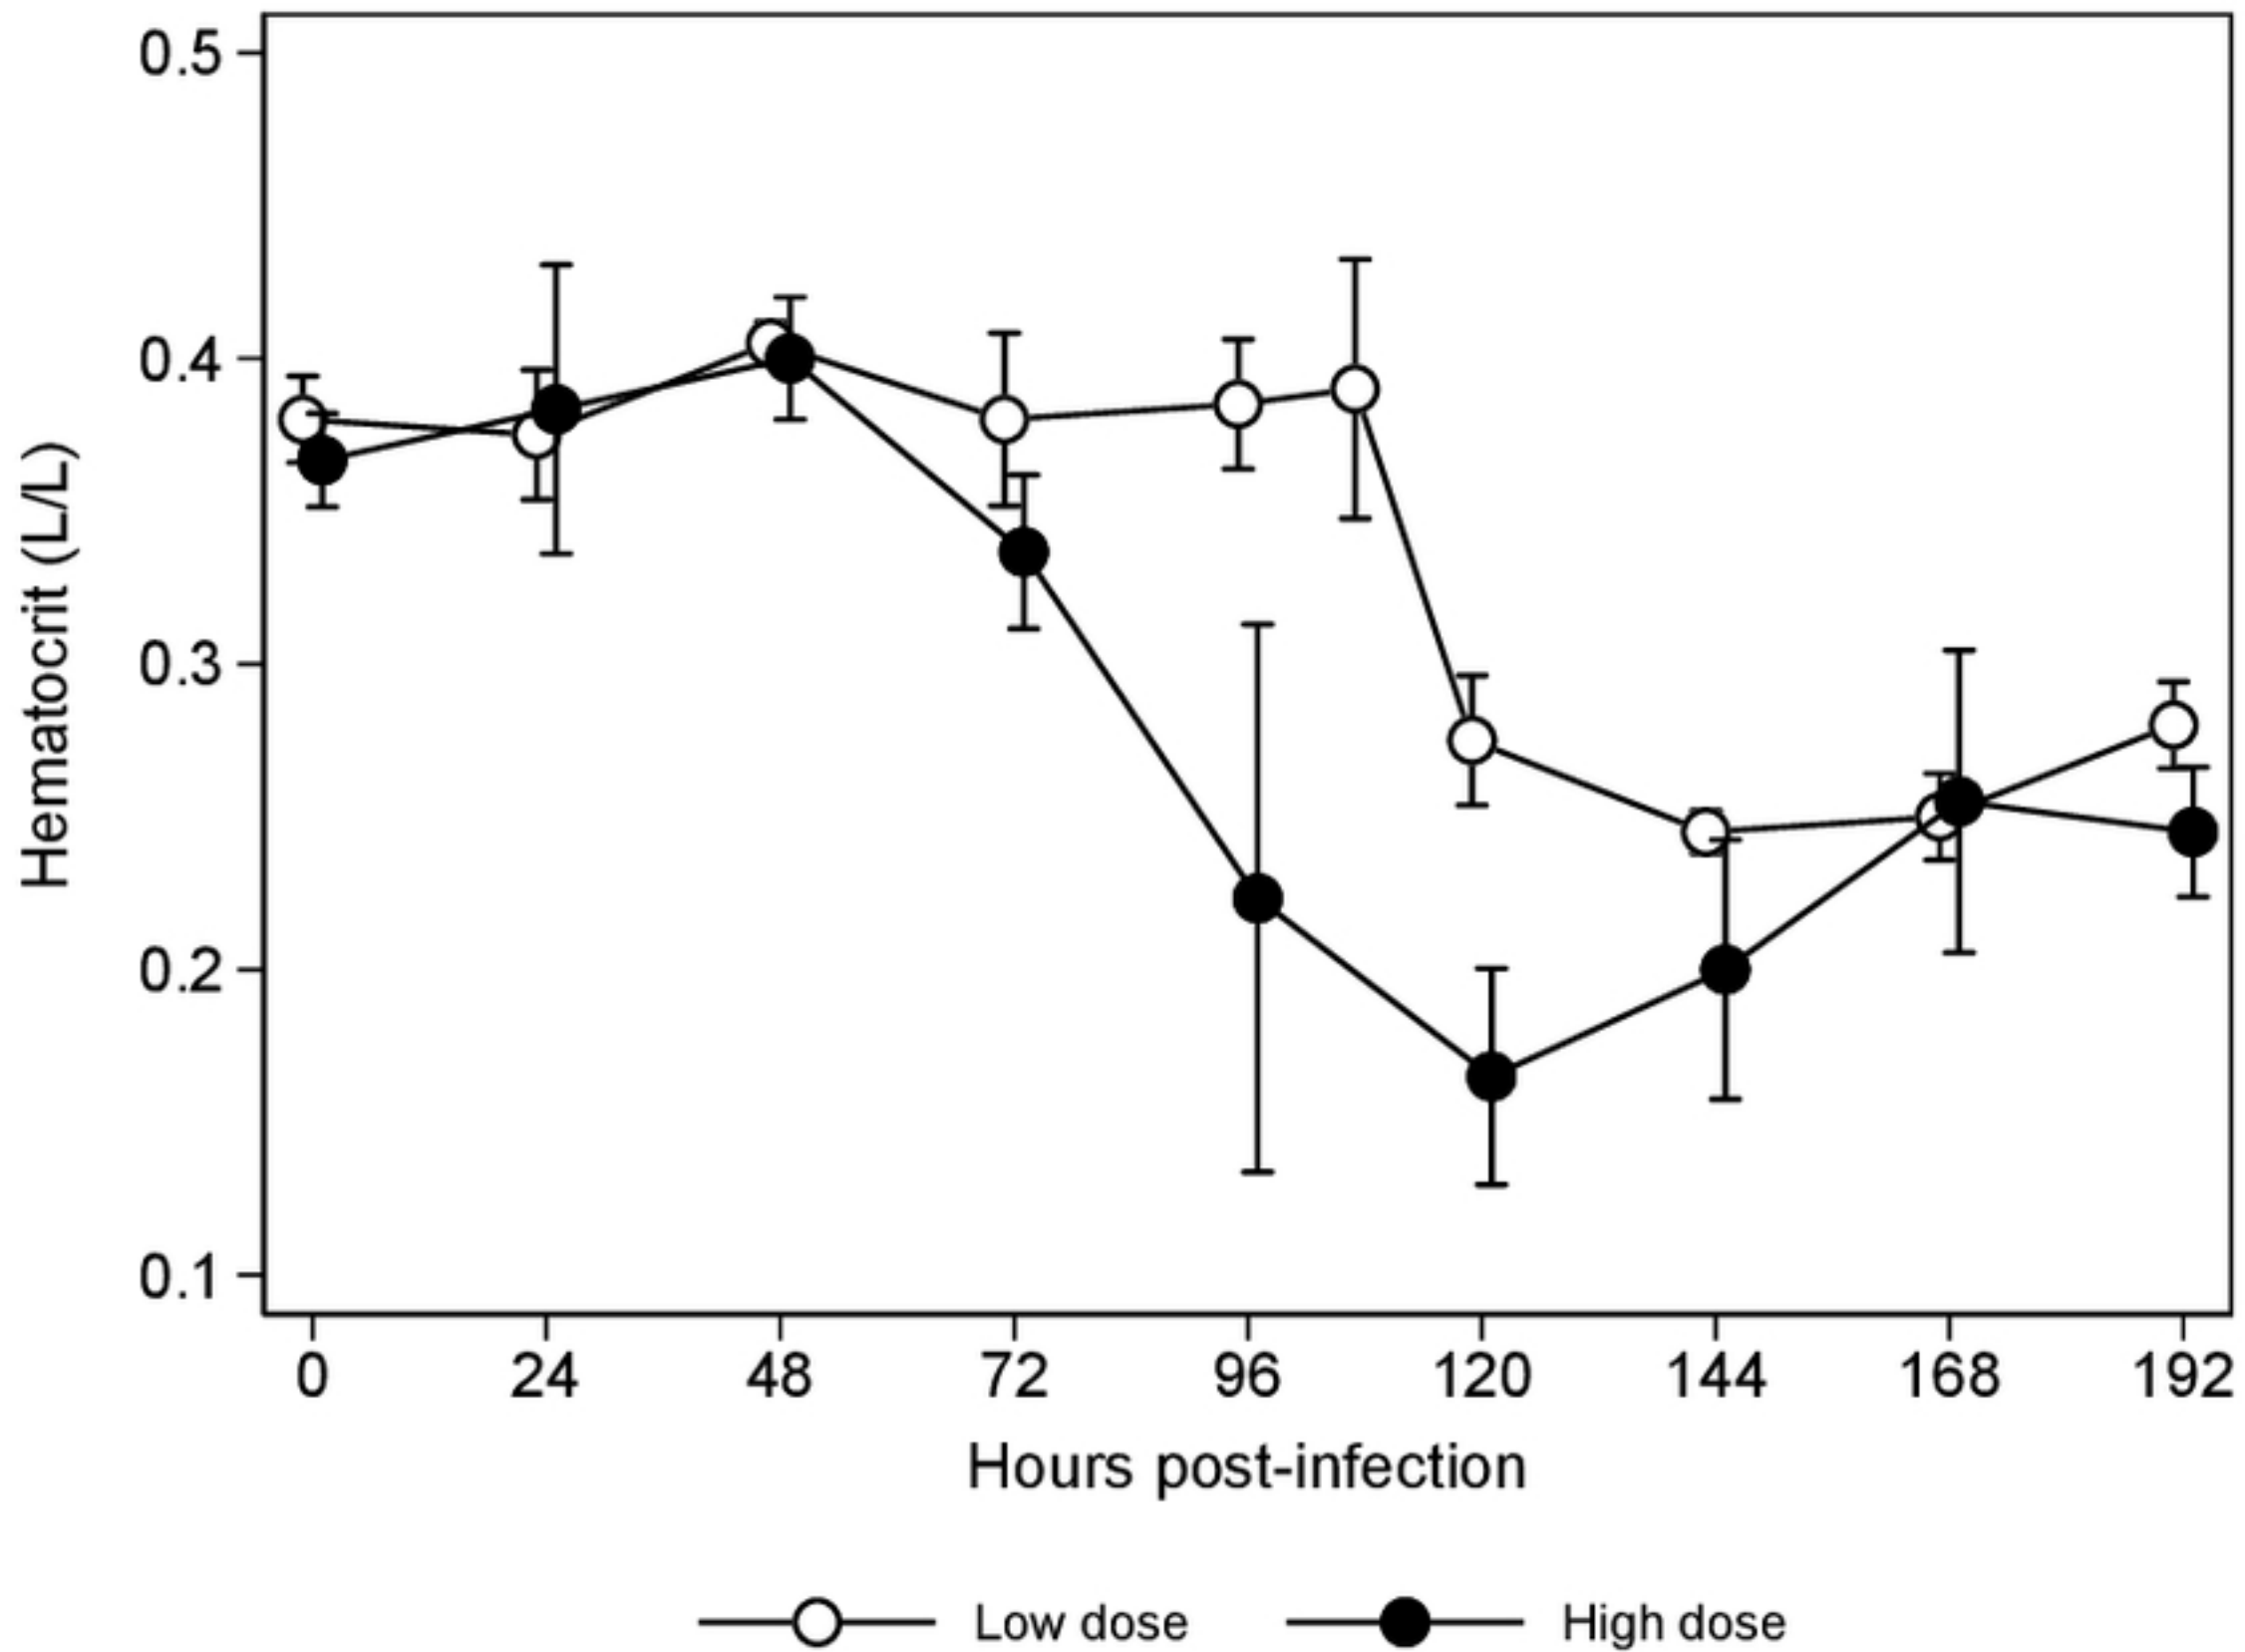

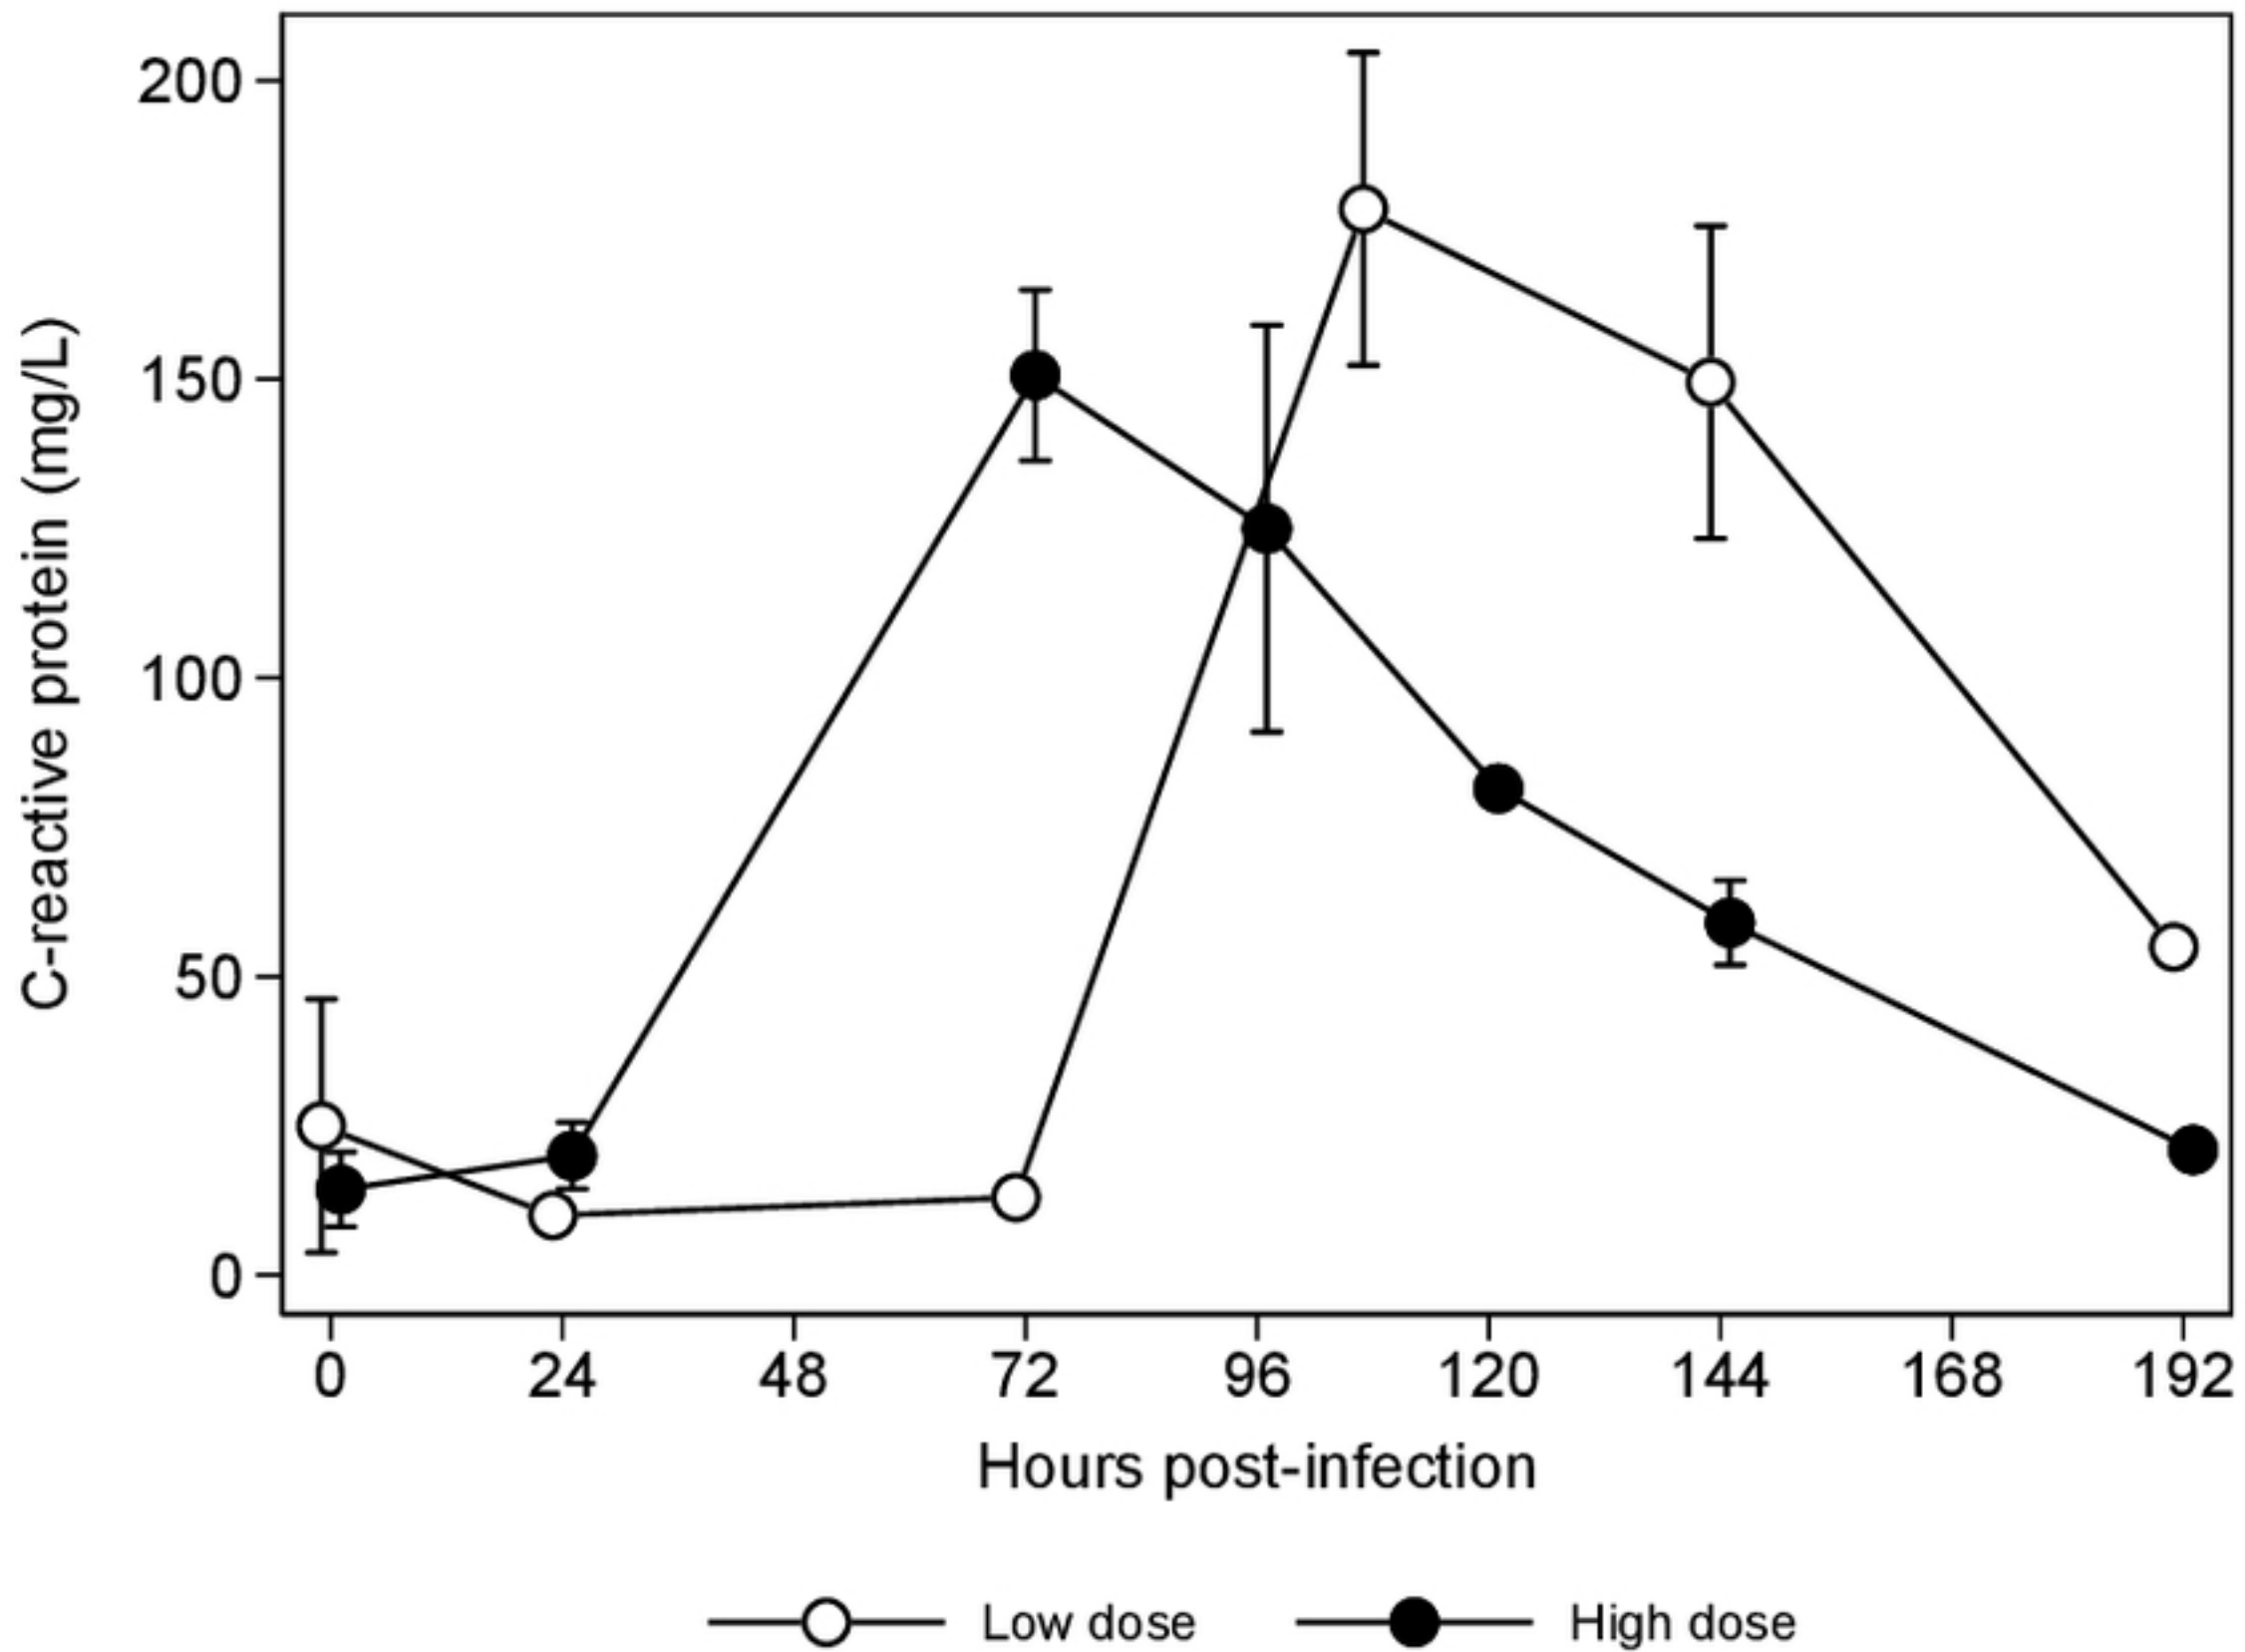



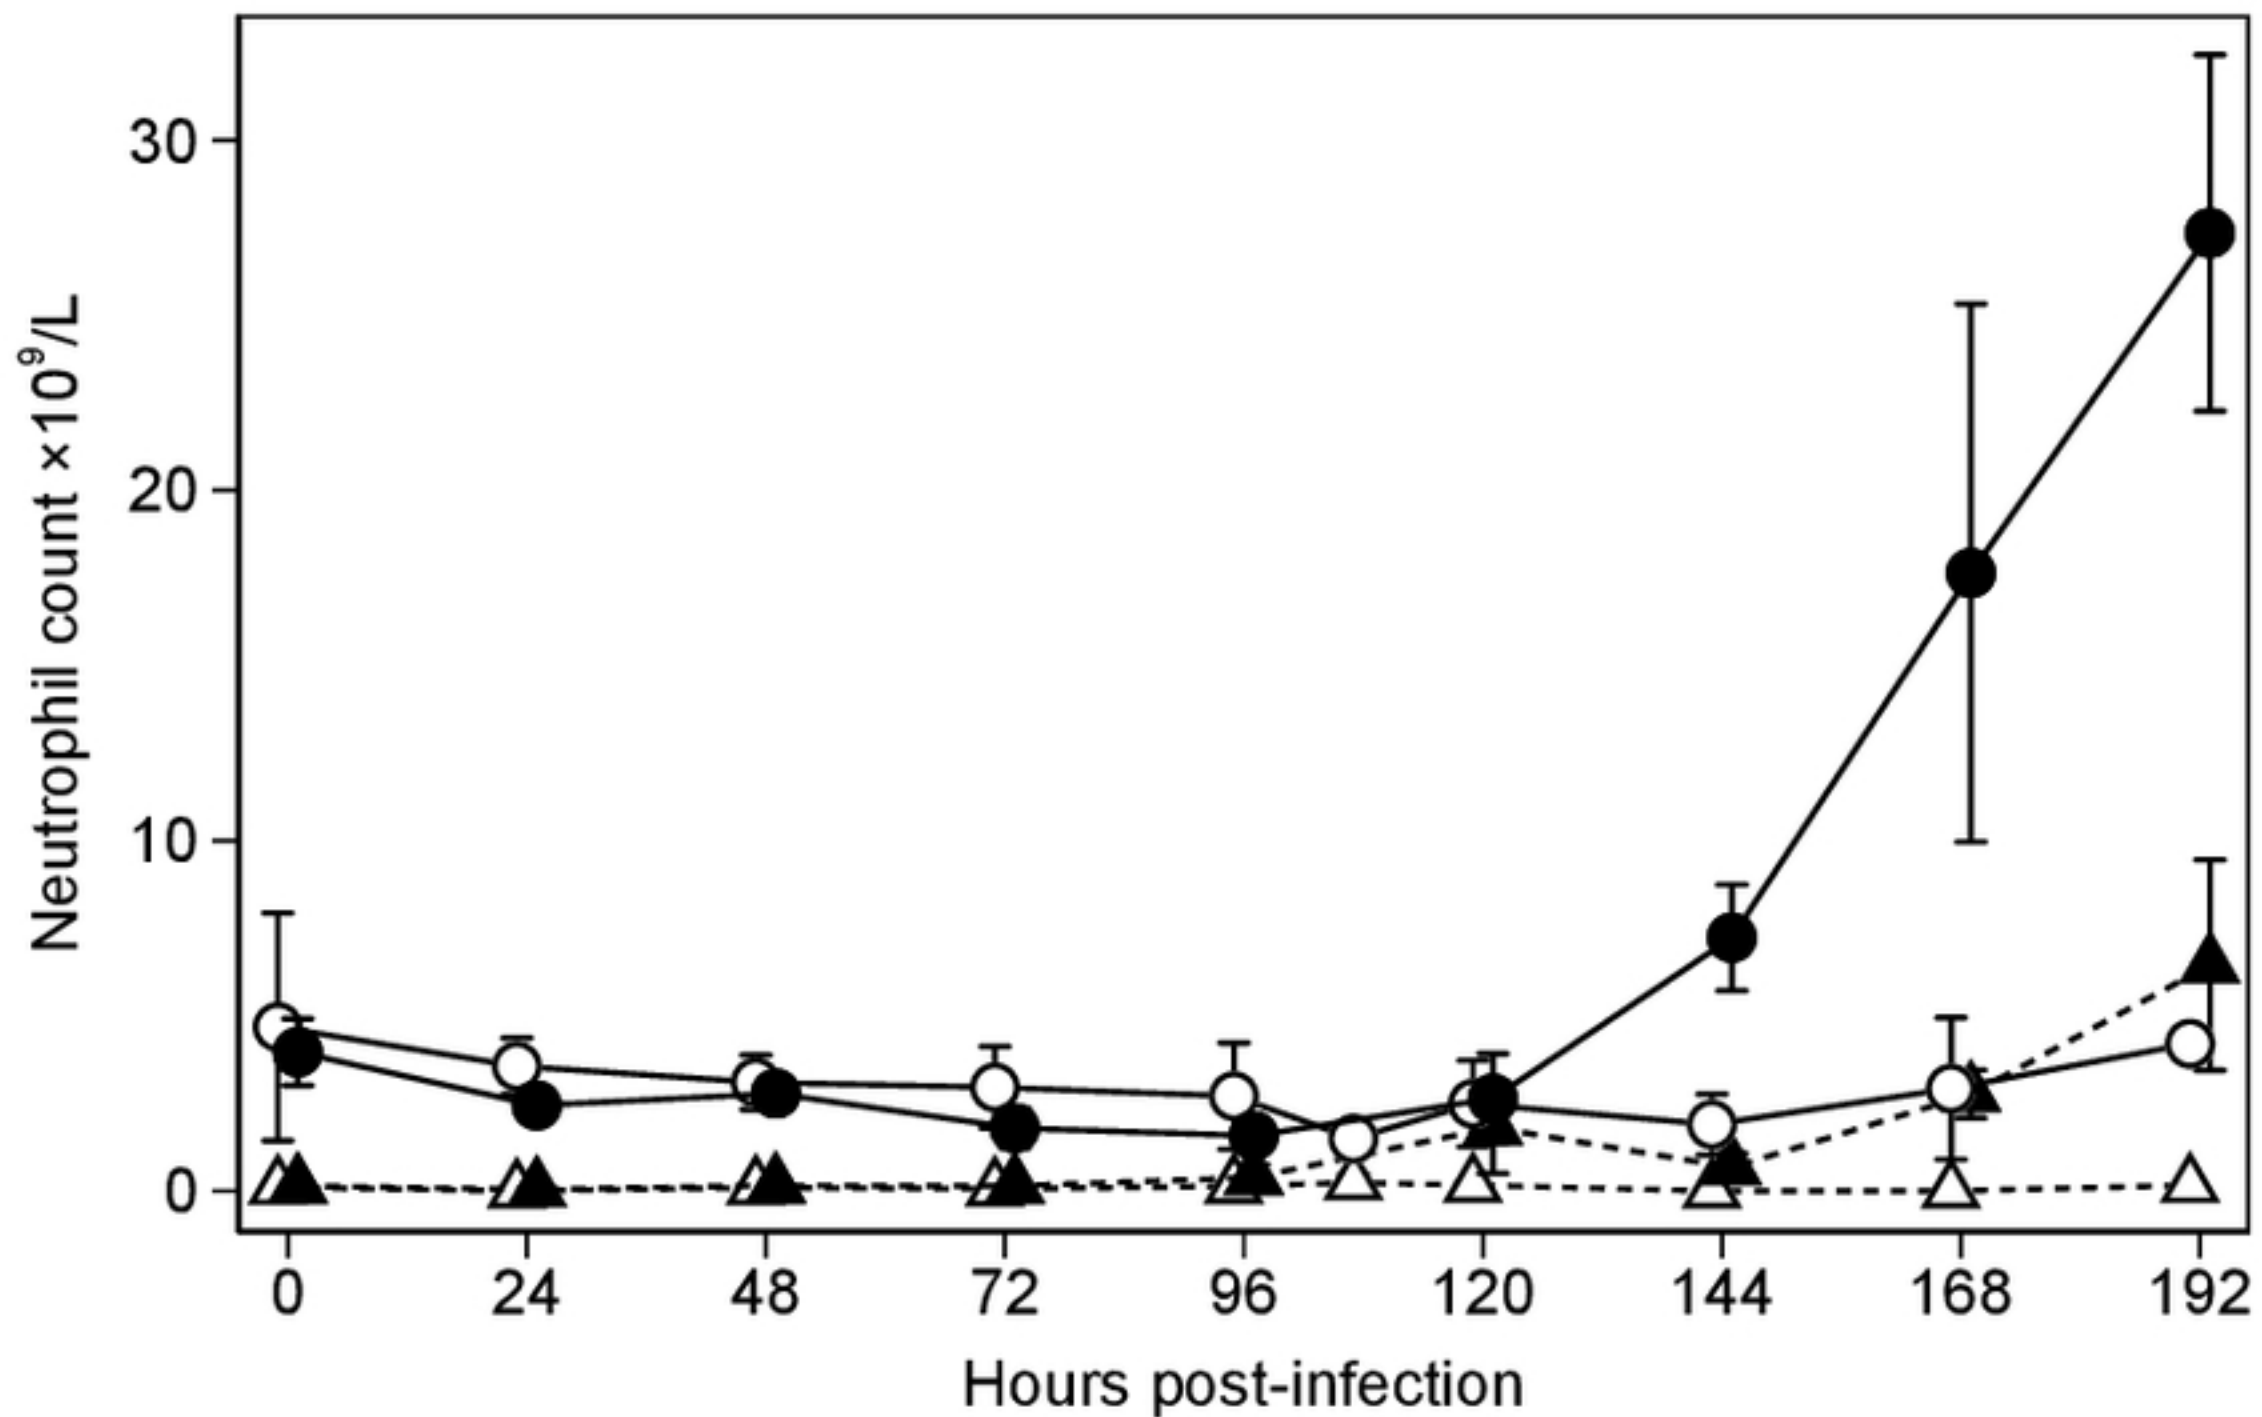

—○— Mature neutrophils (Low dose)      —●— Mature neutrophils (High dose)  
- - -△- - - Band neutrophils (Low dose)      - - -▲- - - Band neutrophils (High dose)

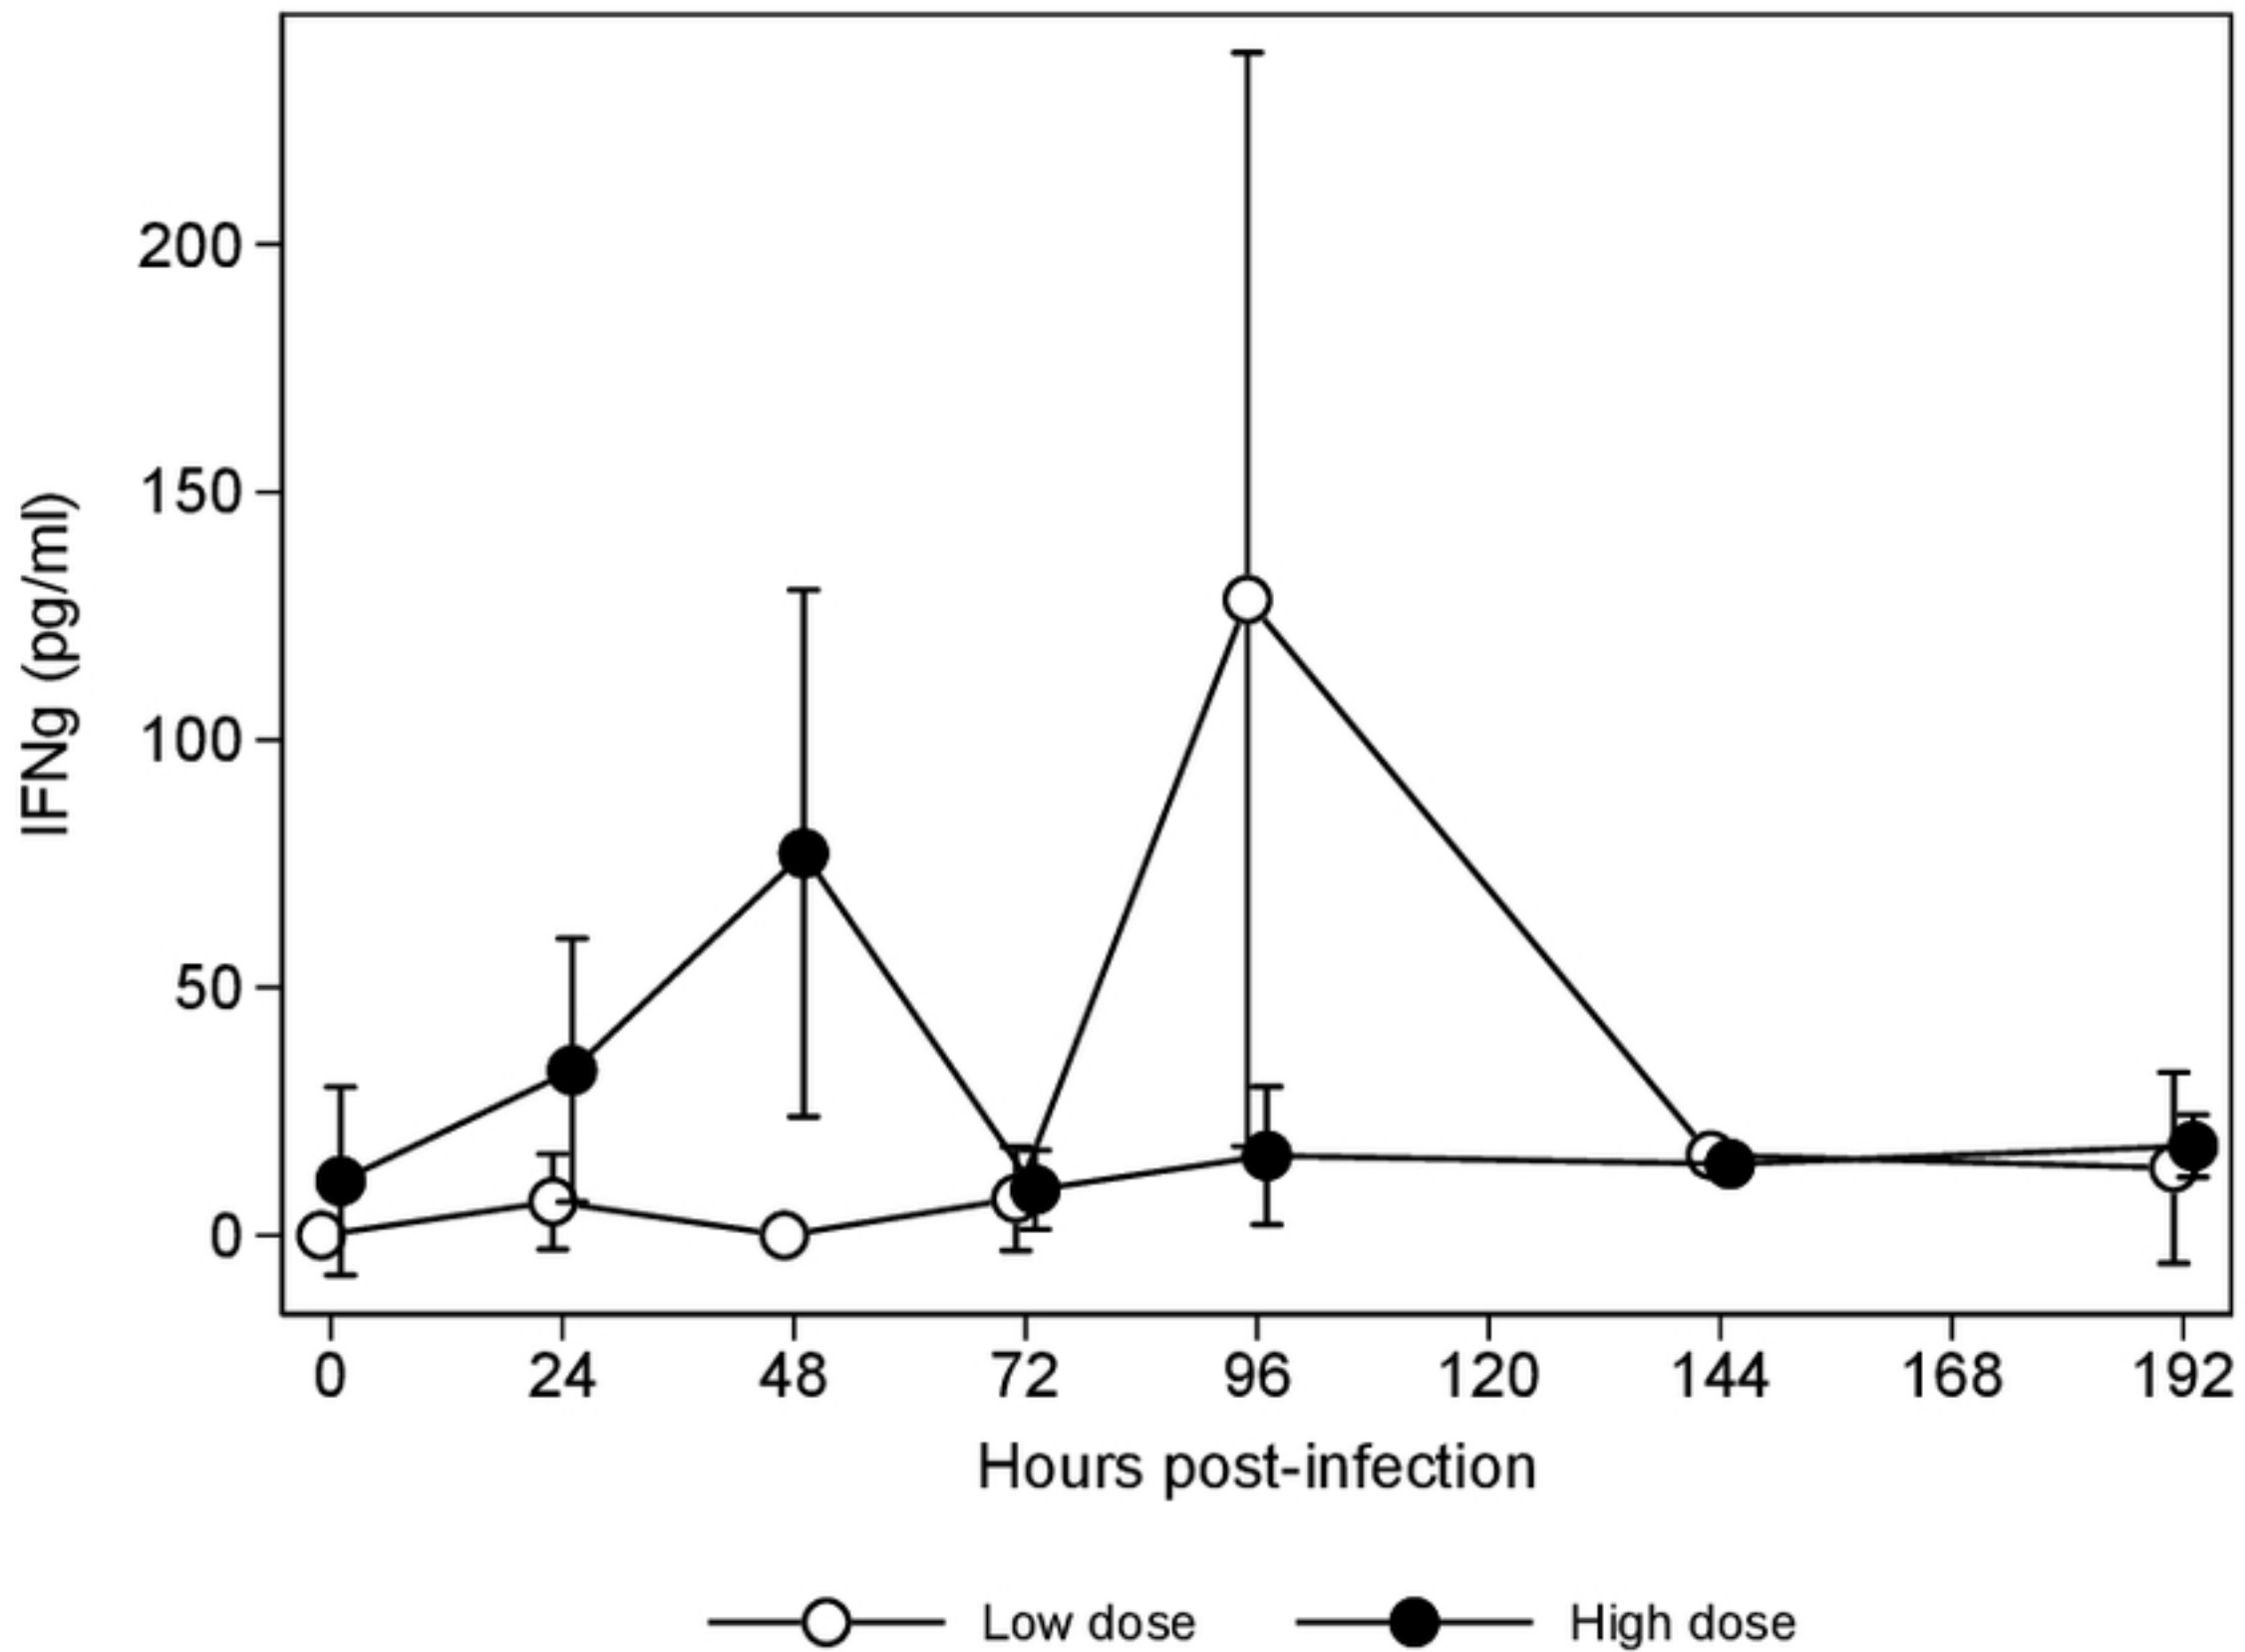

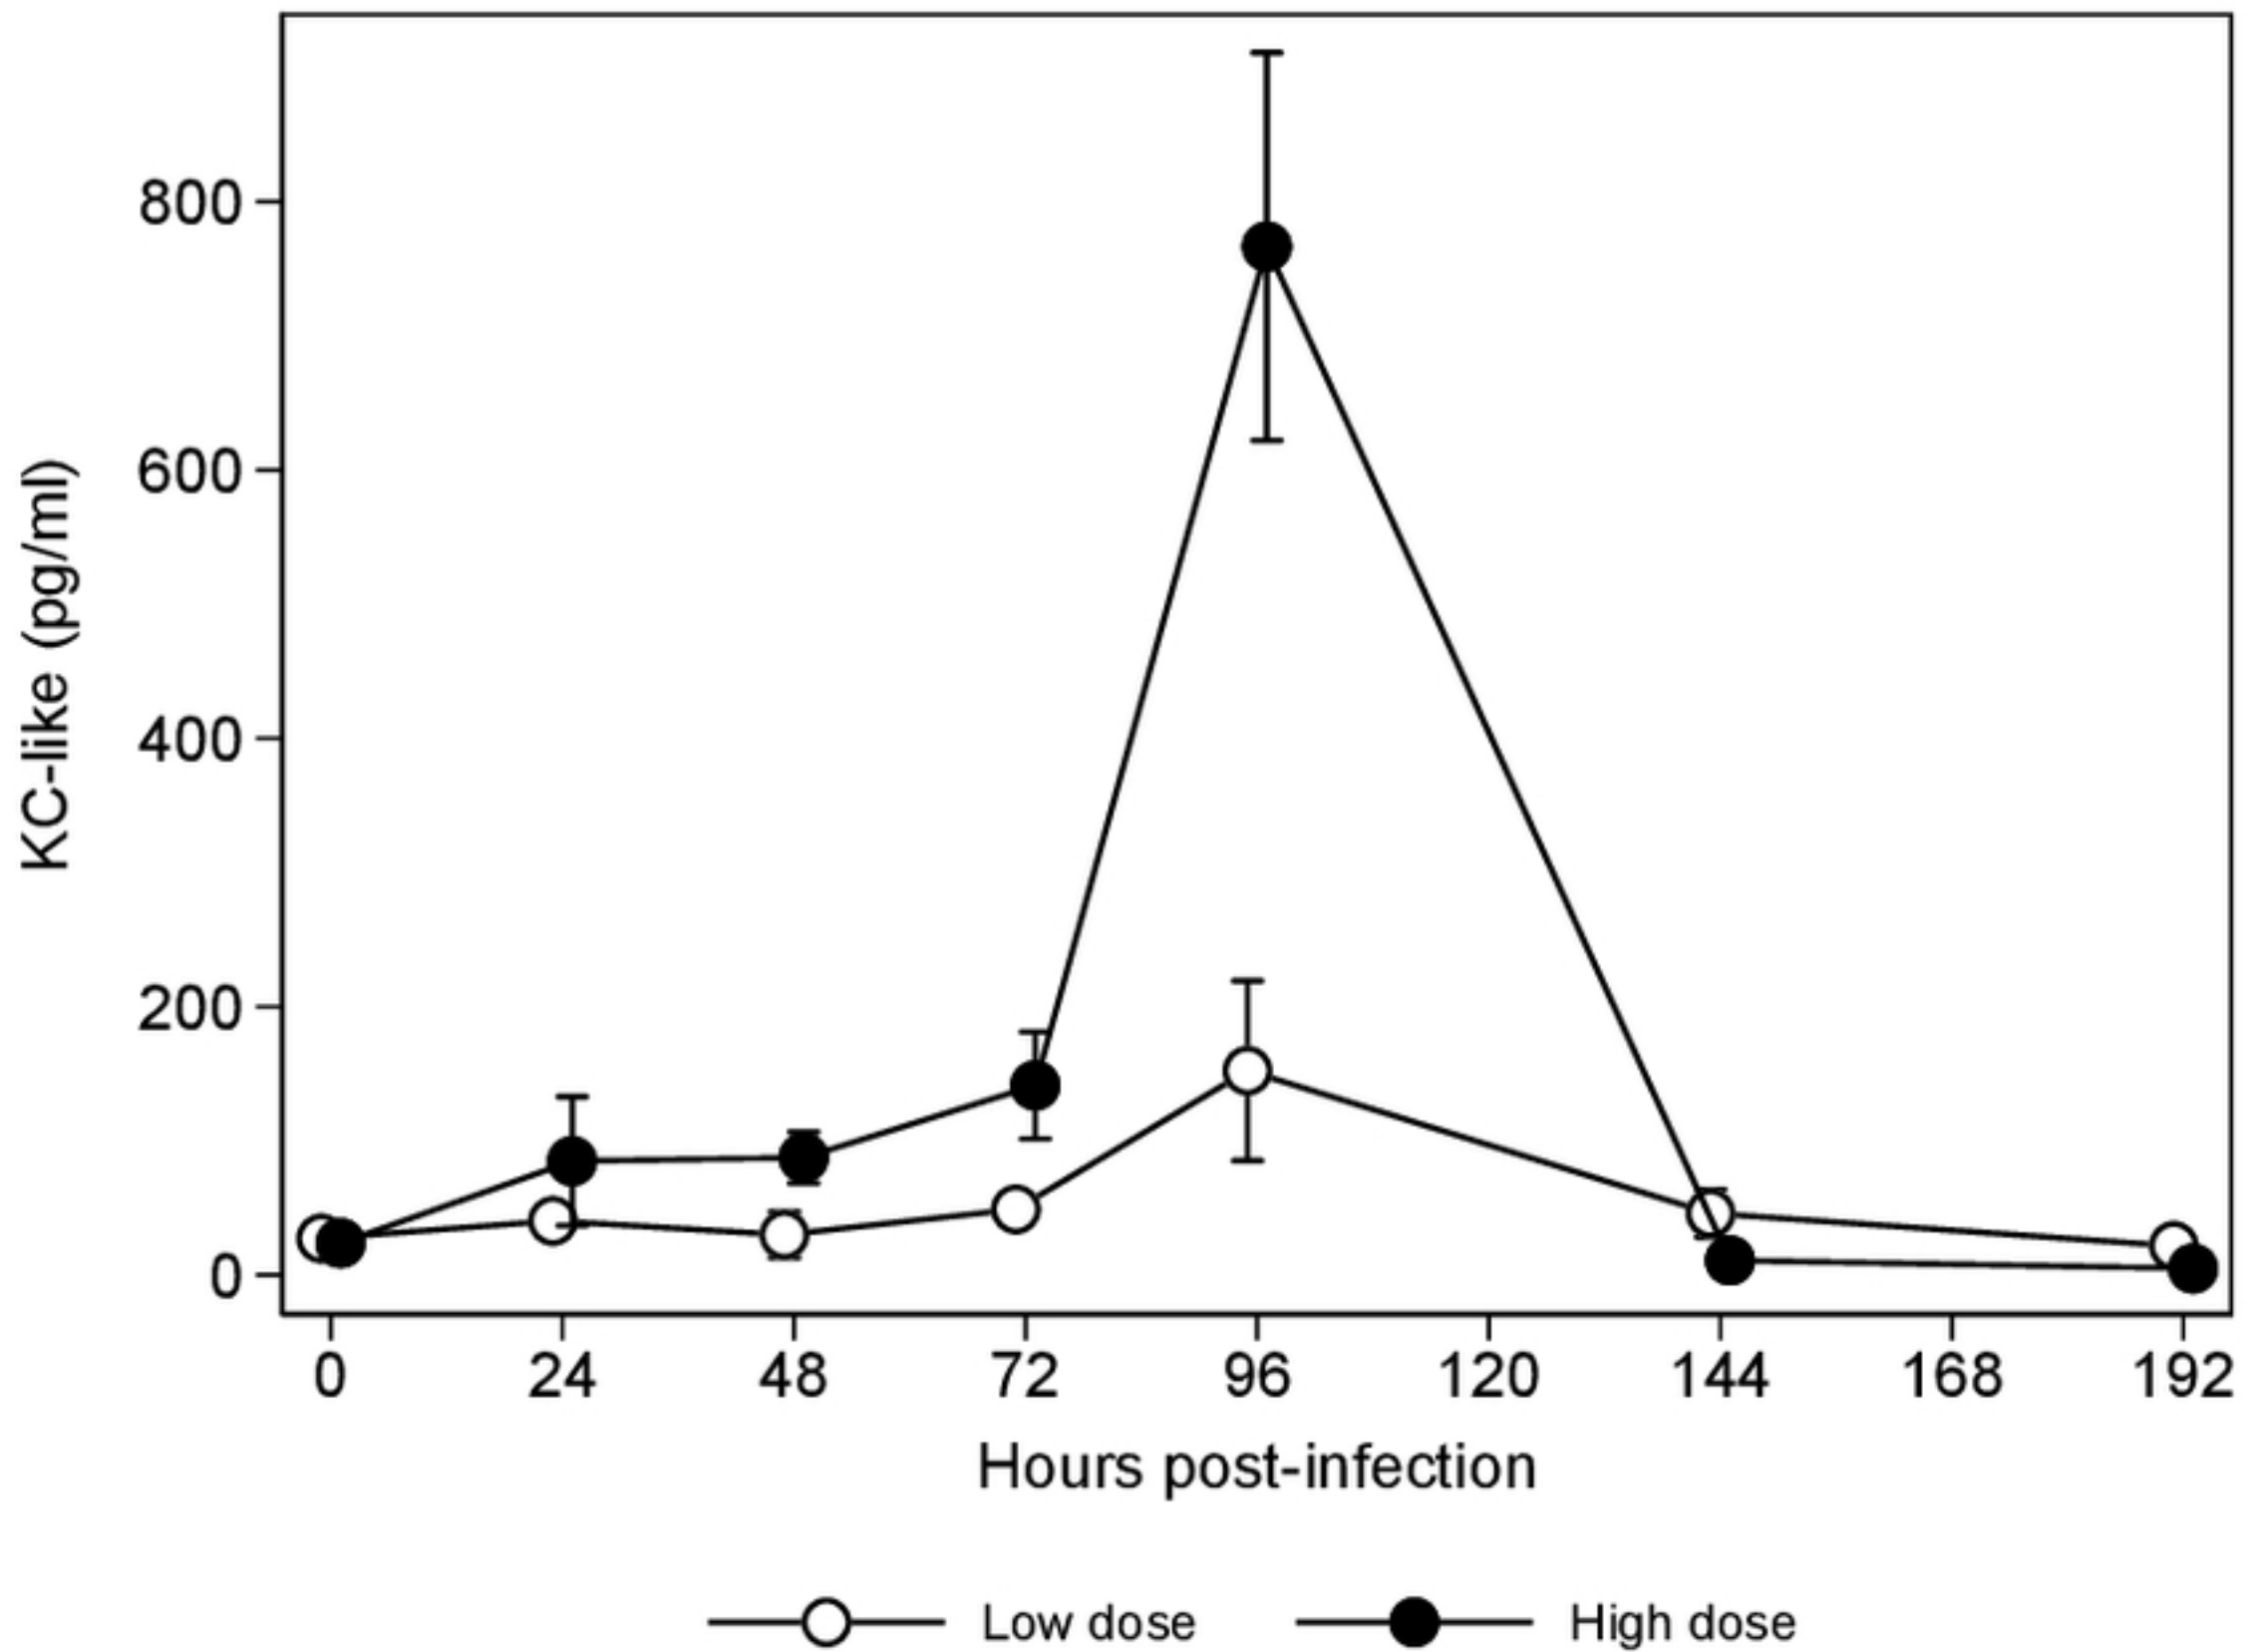

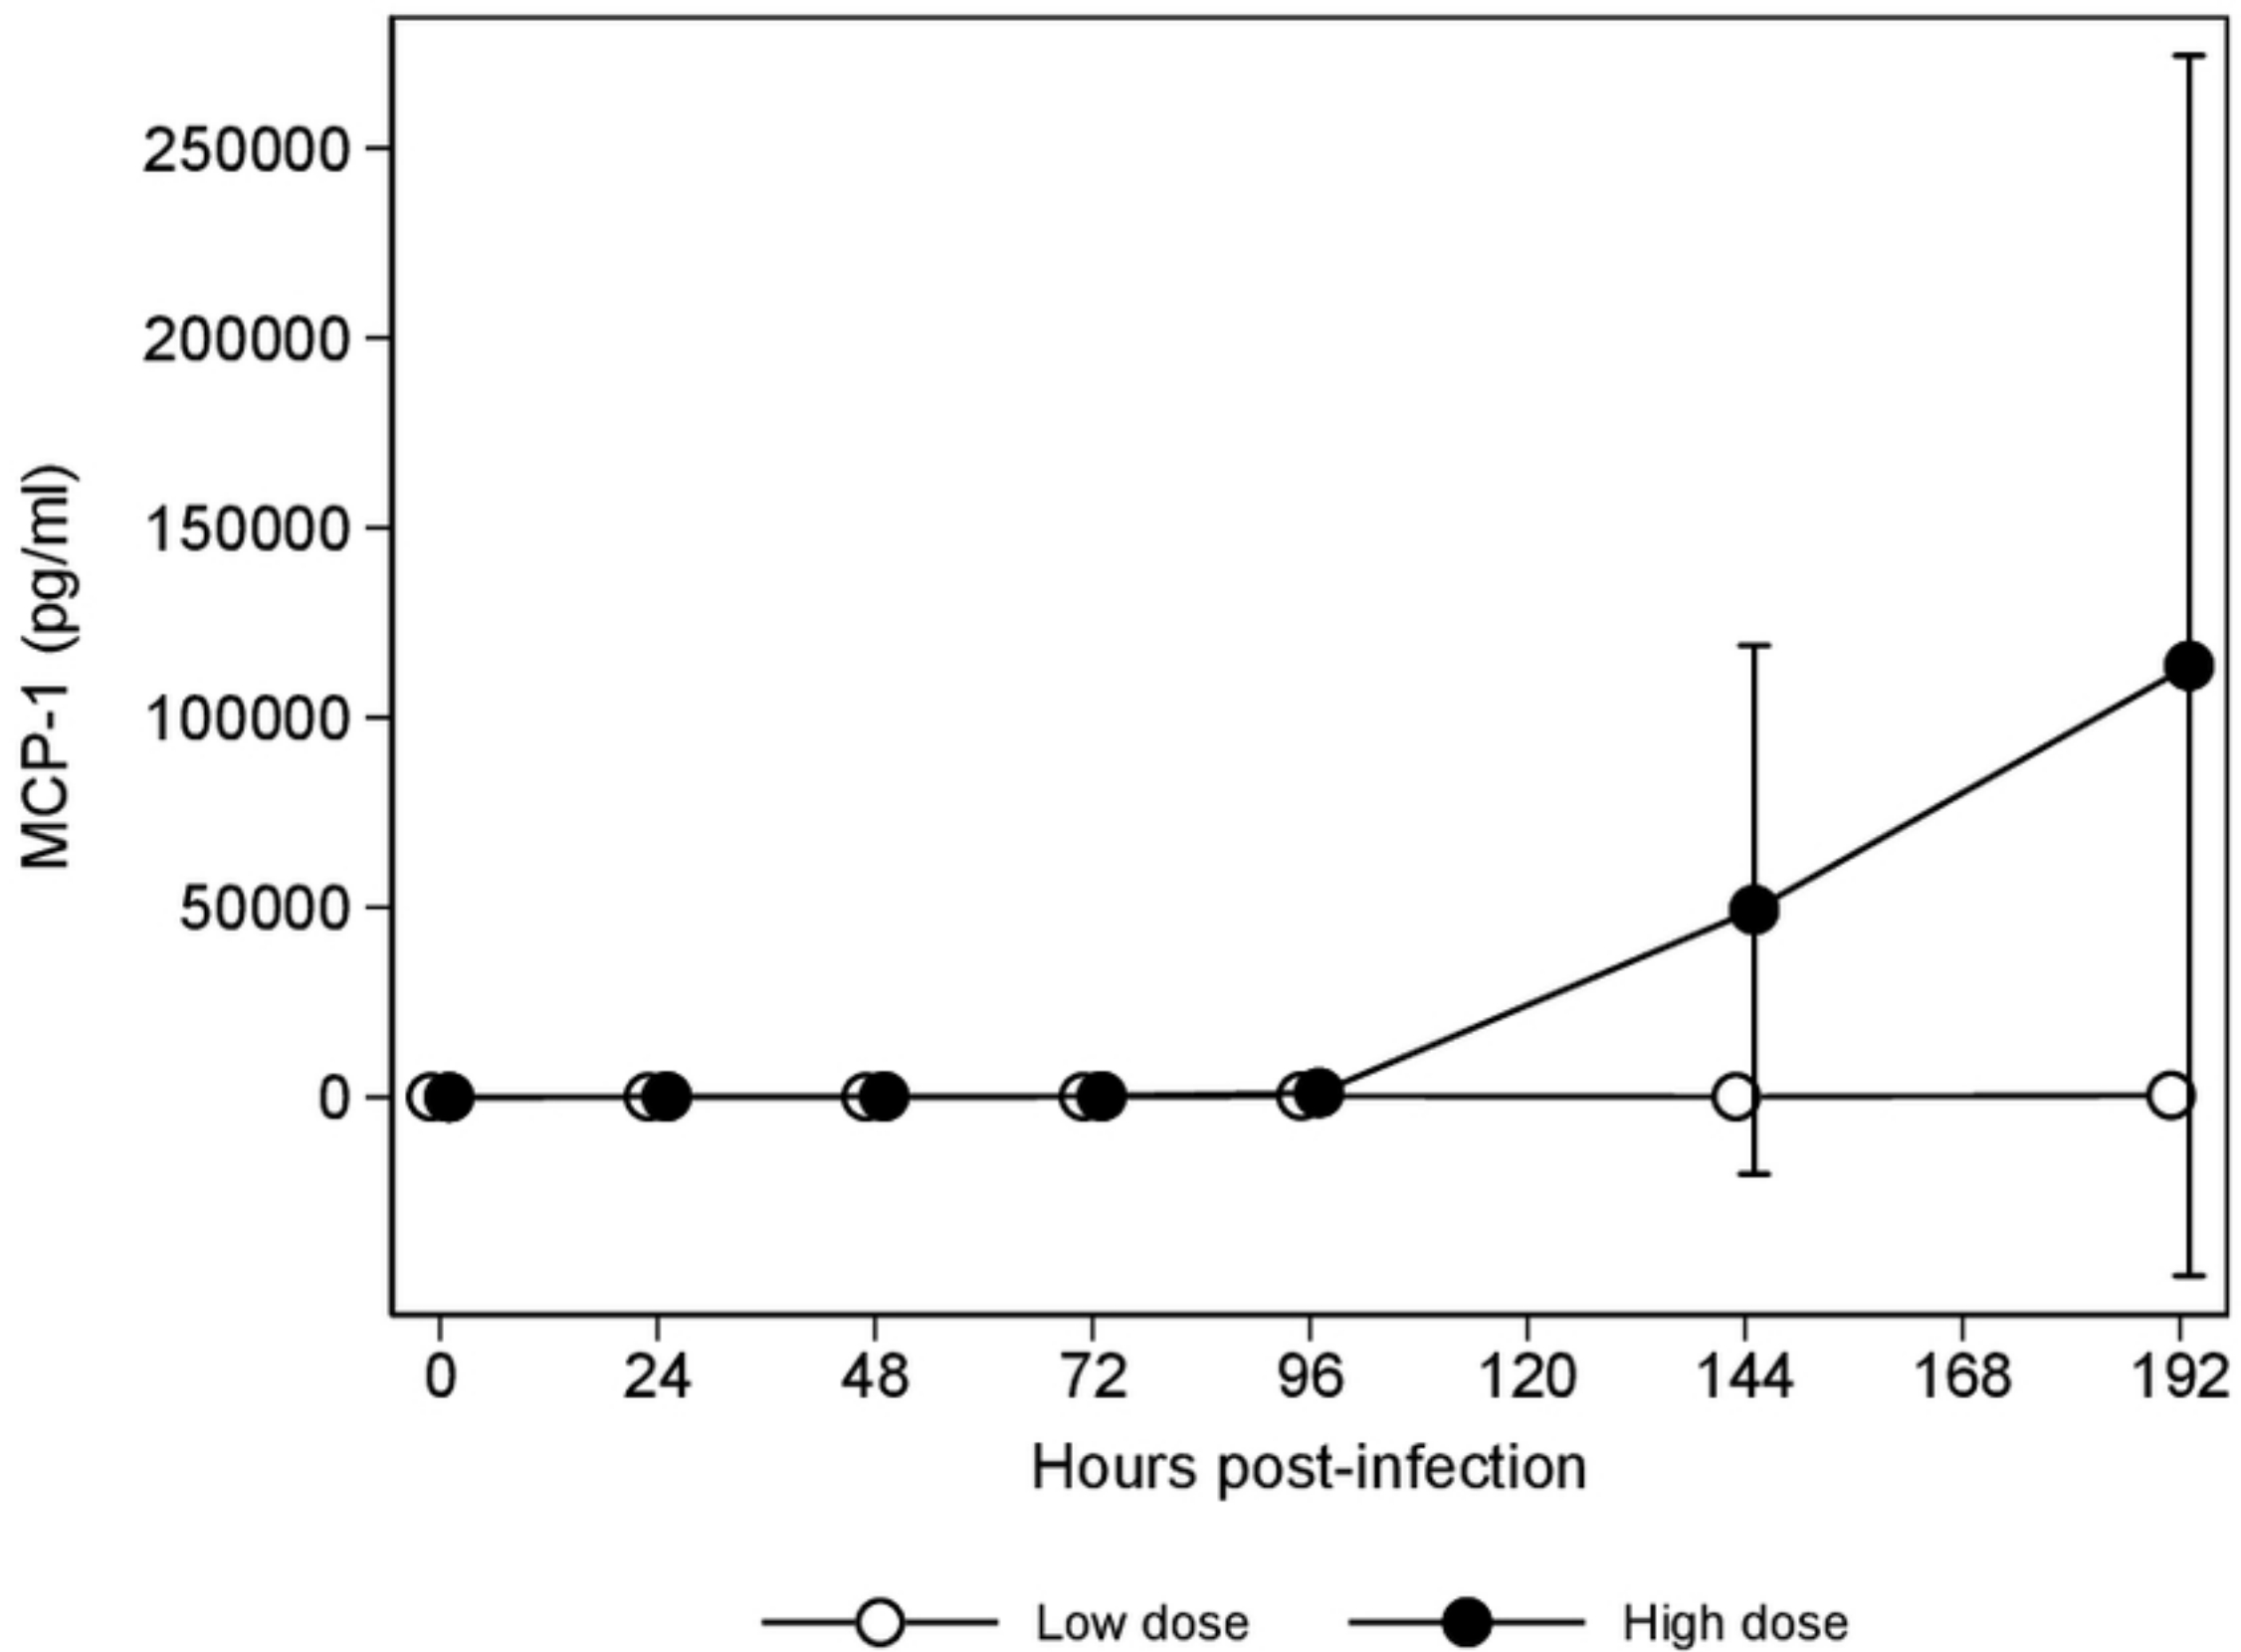

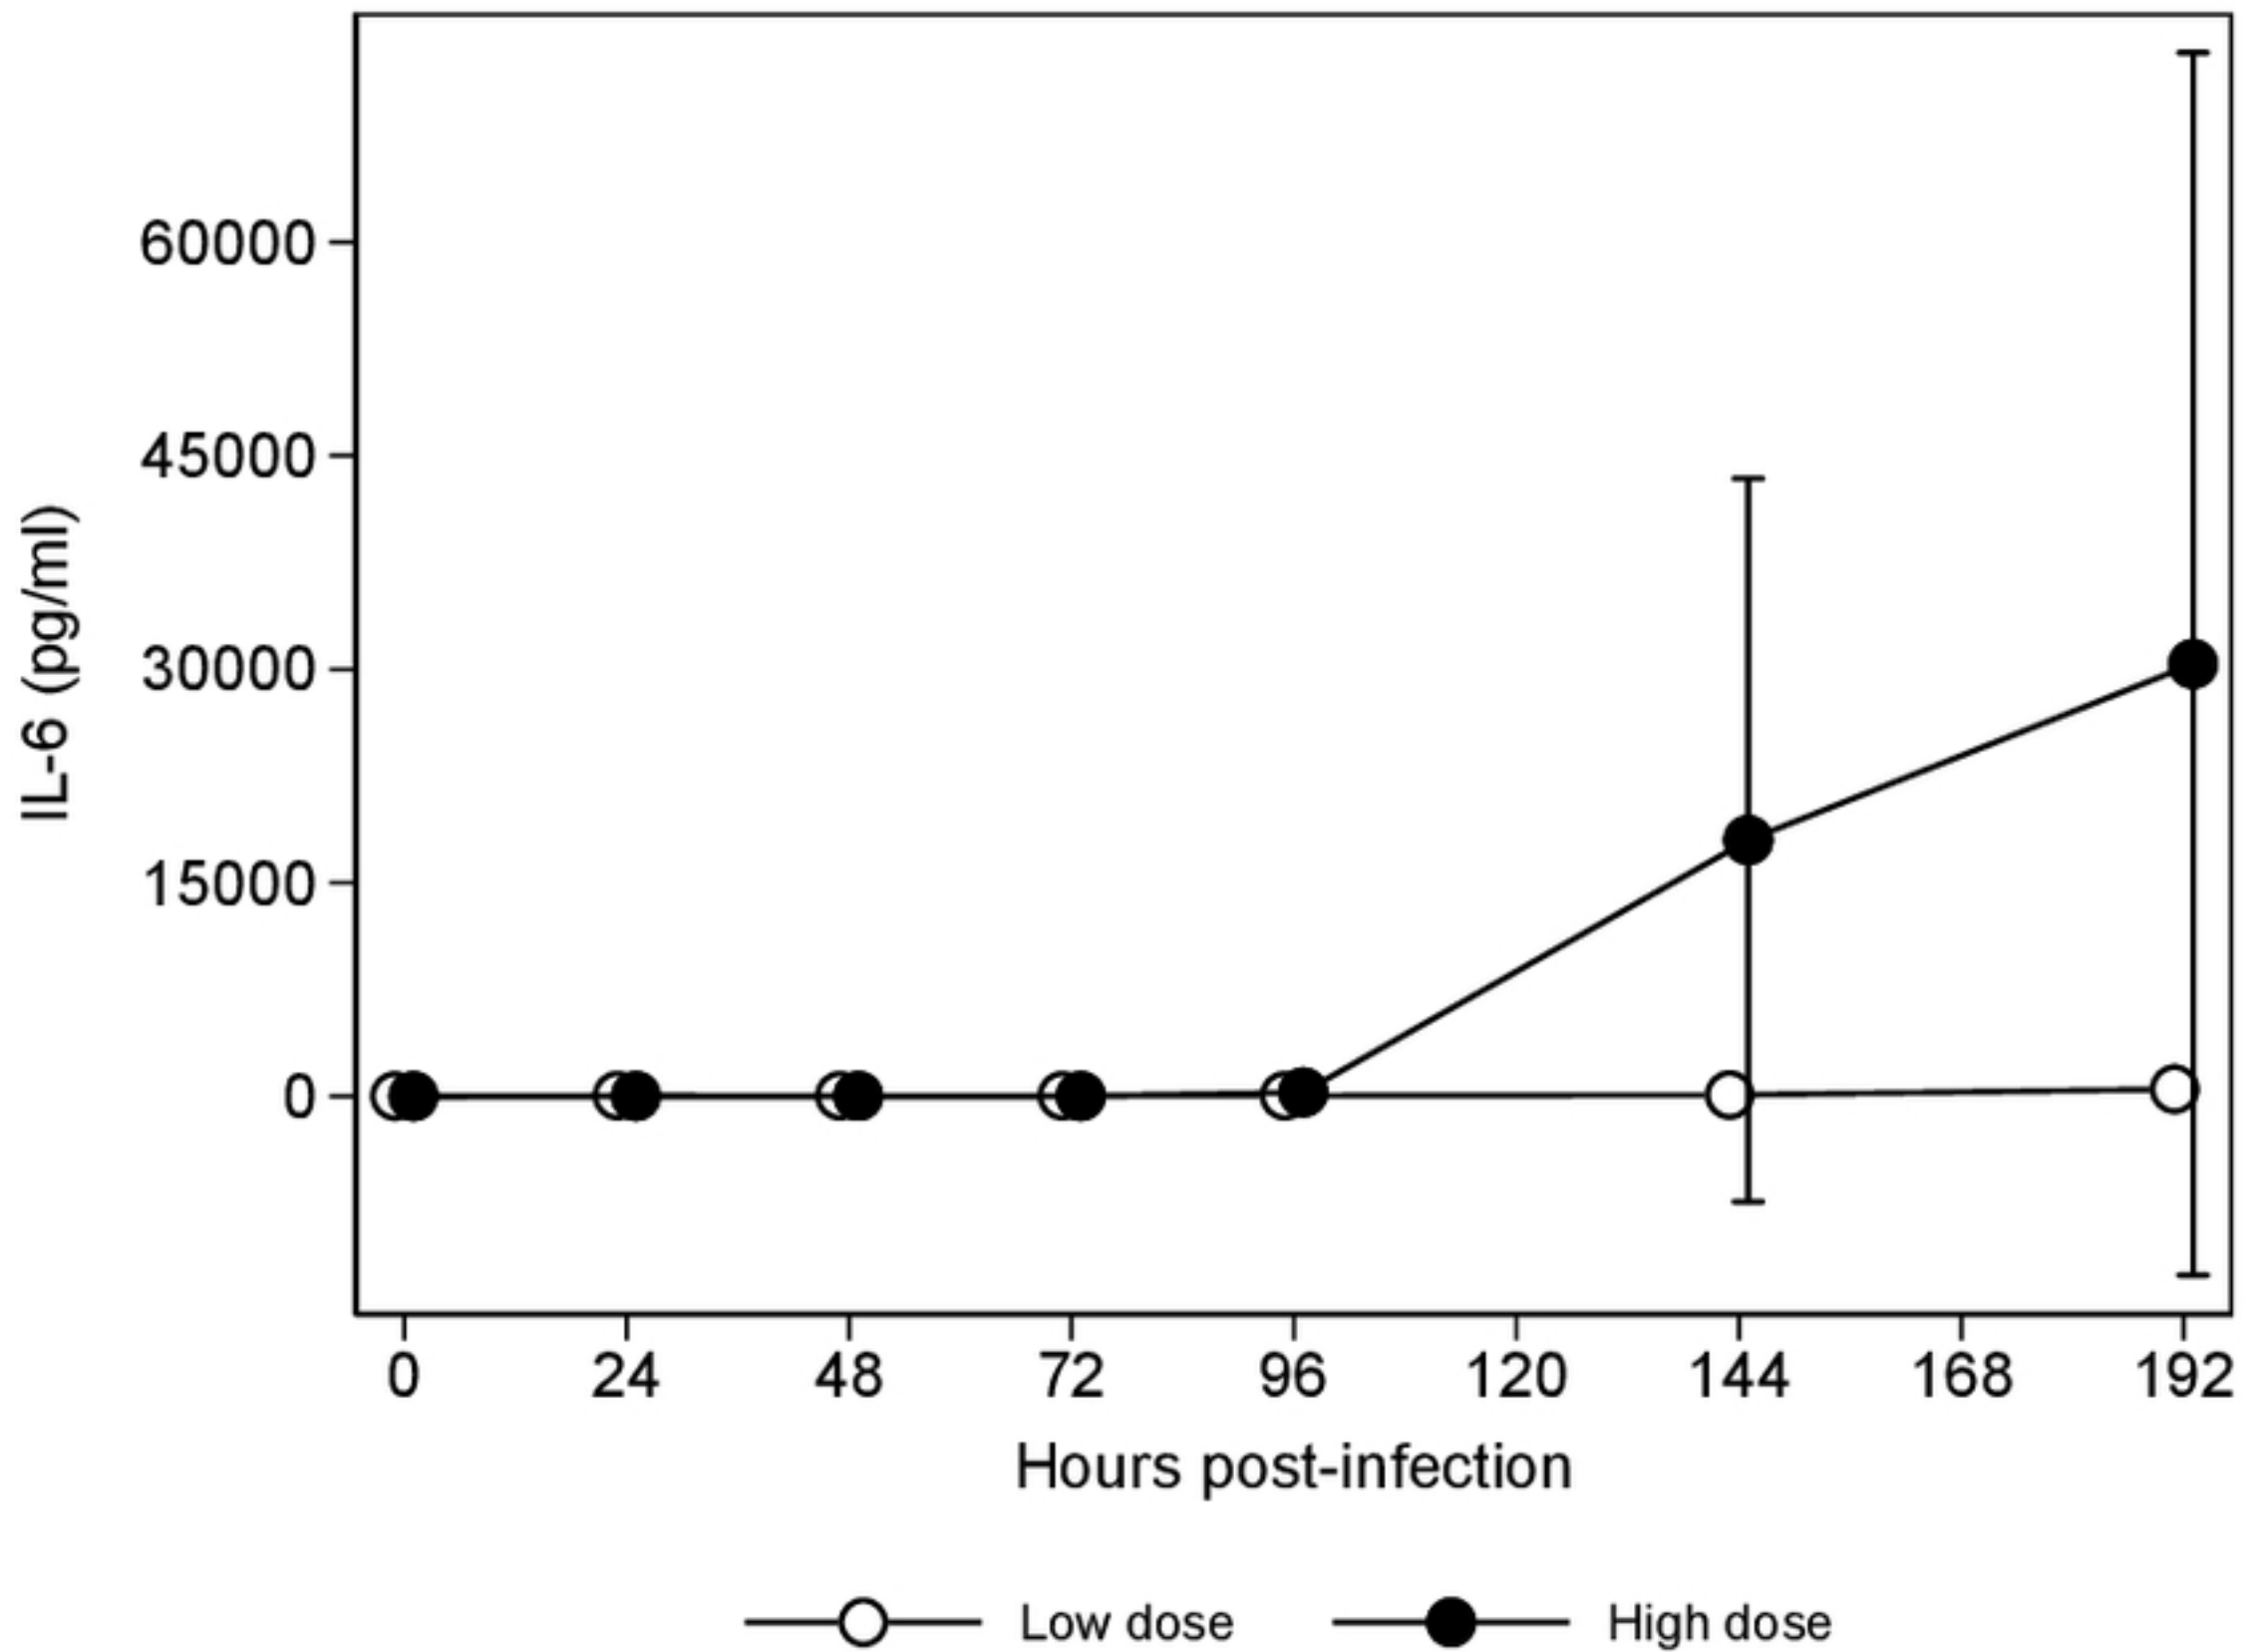

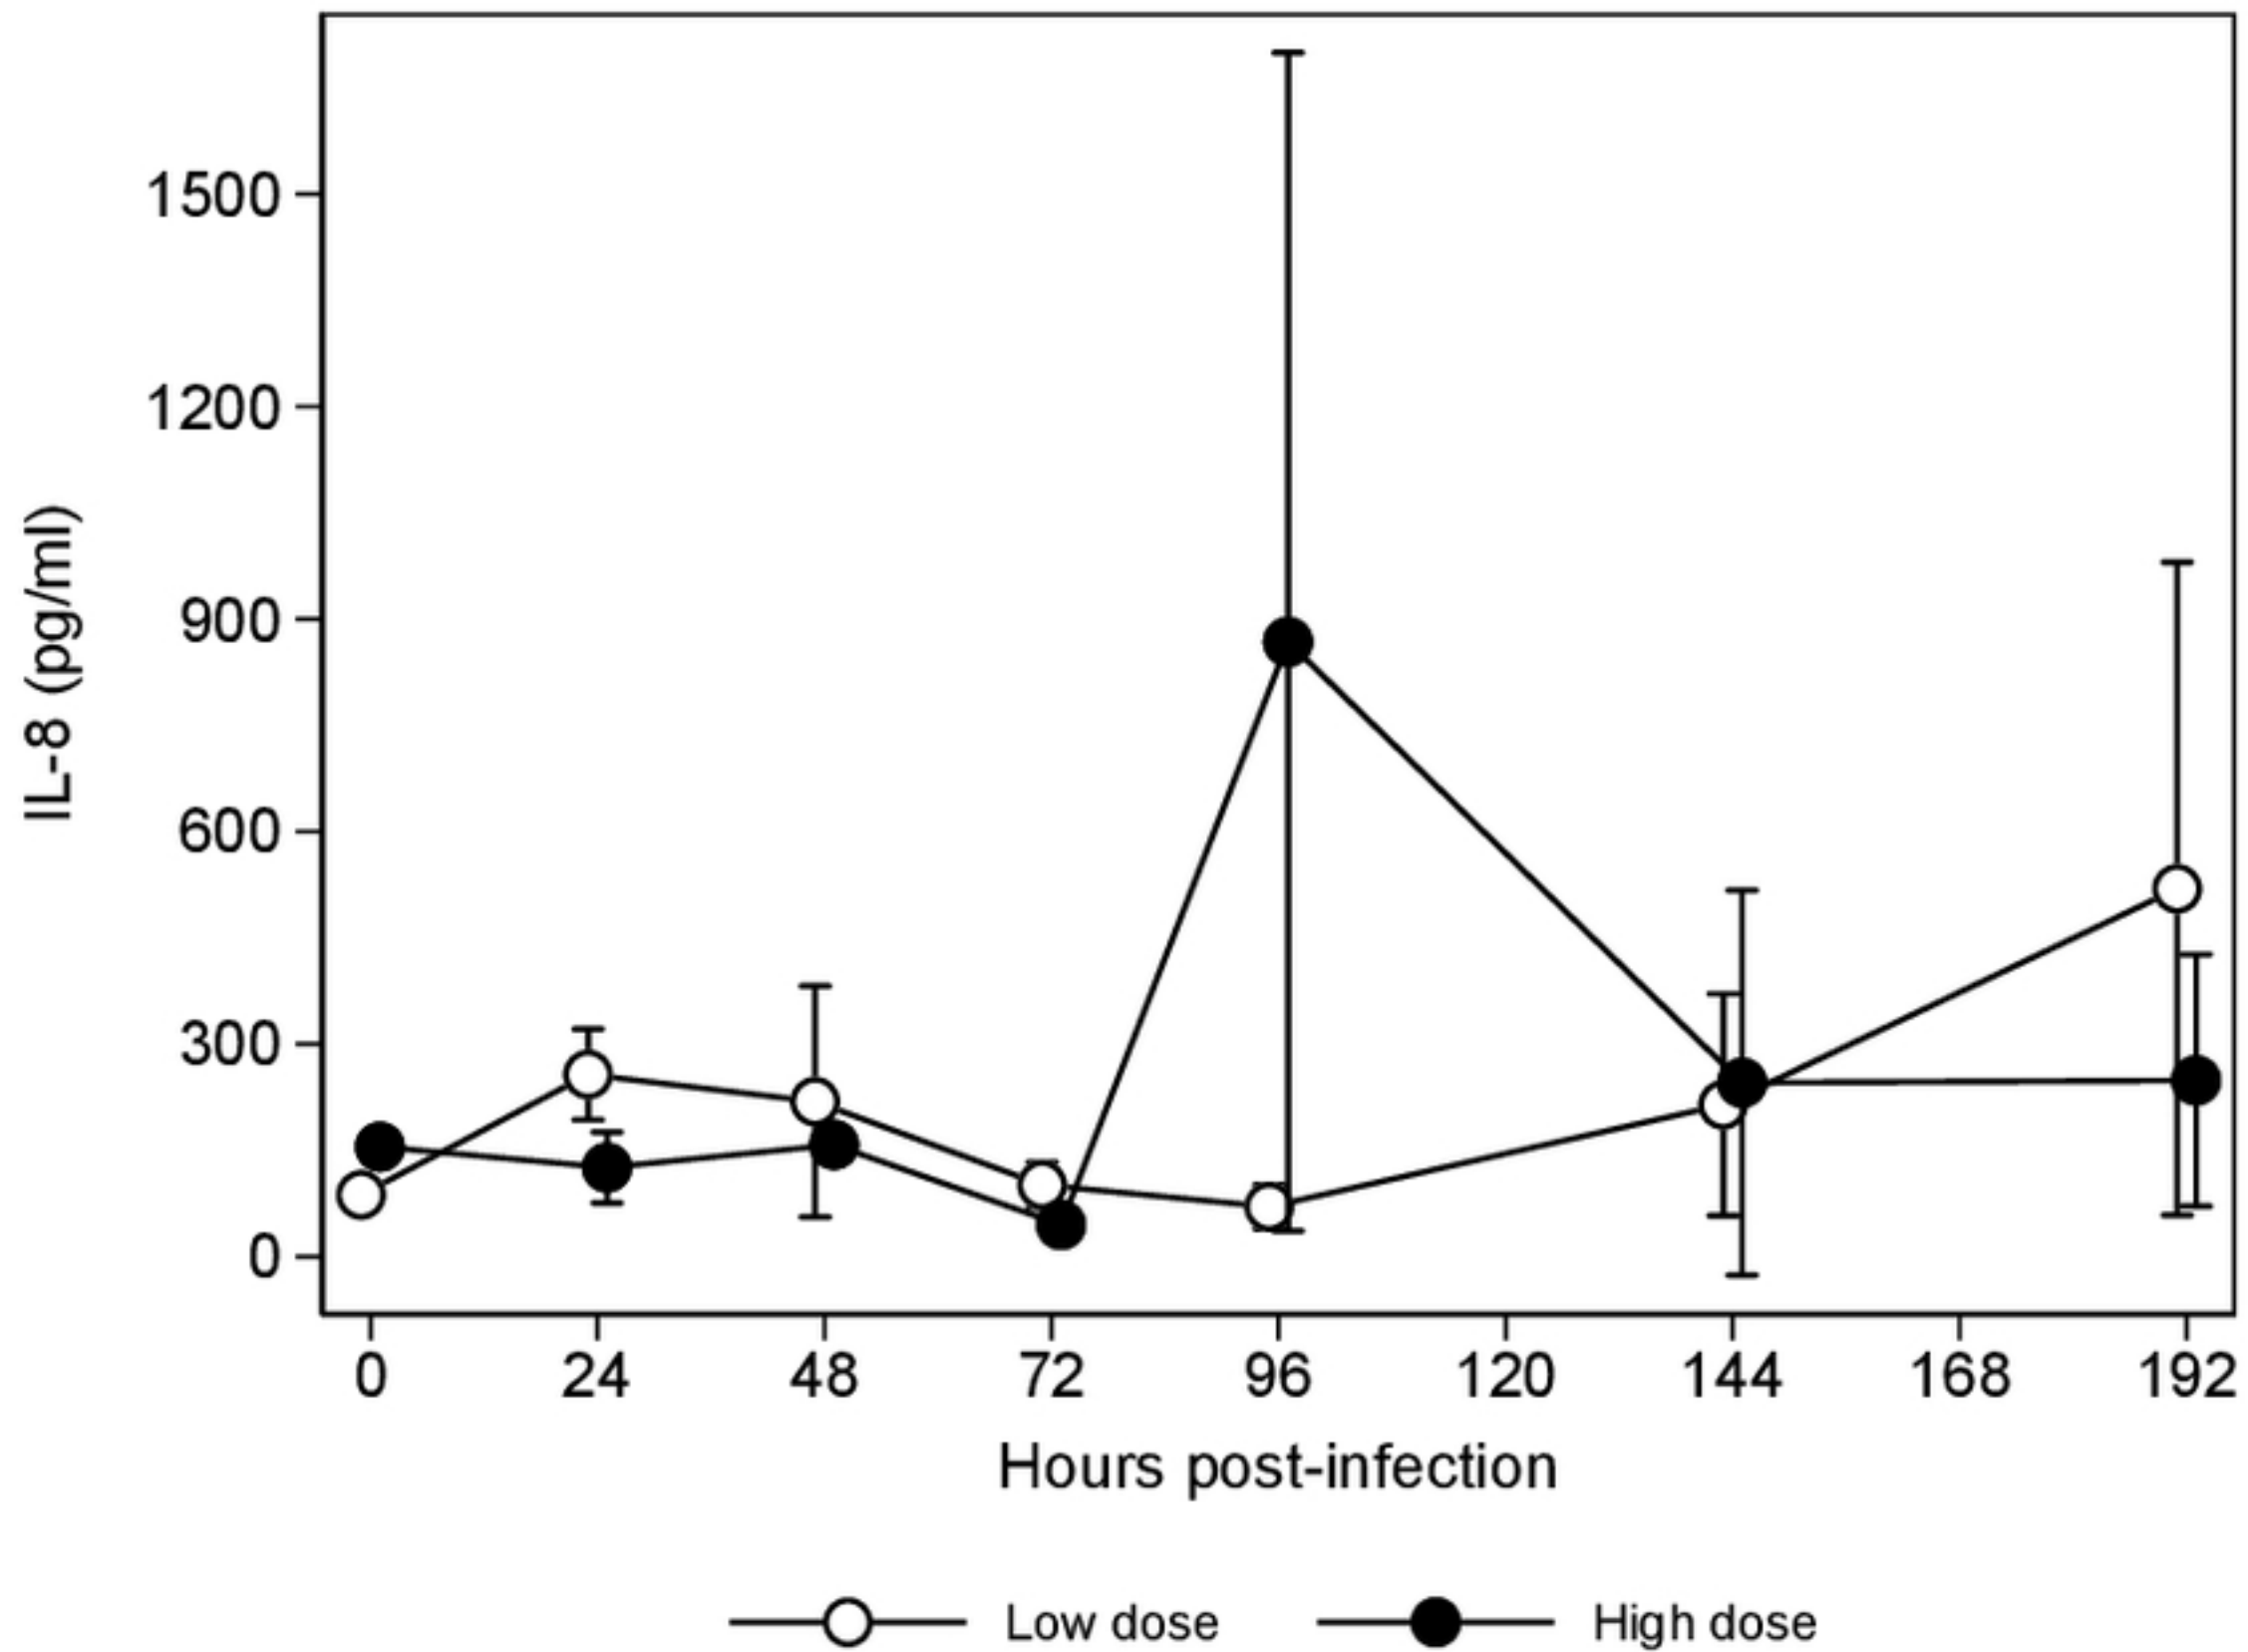

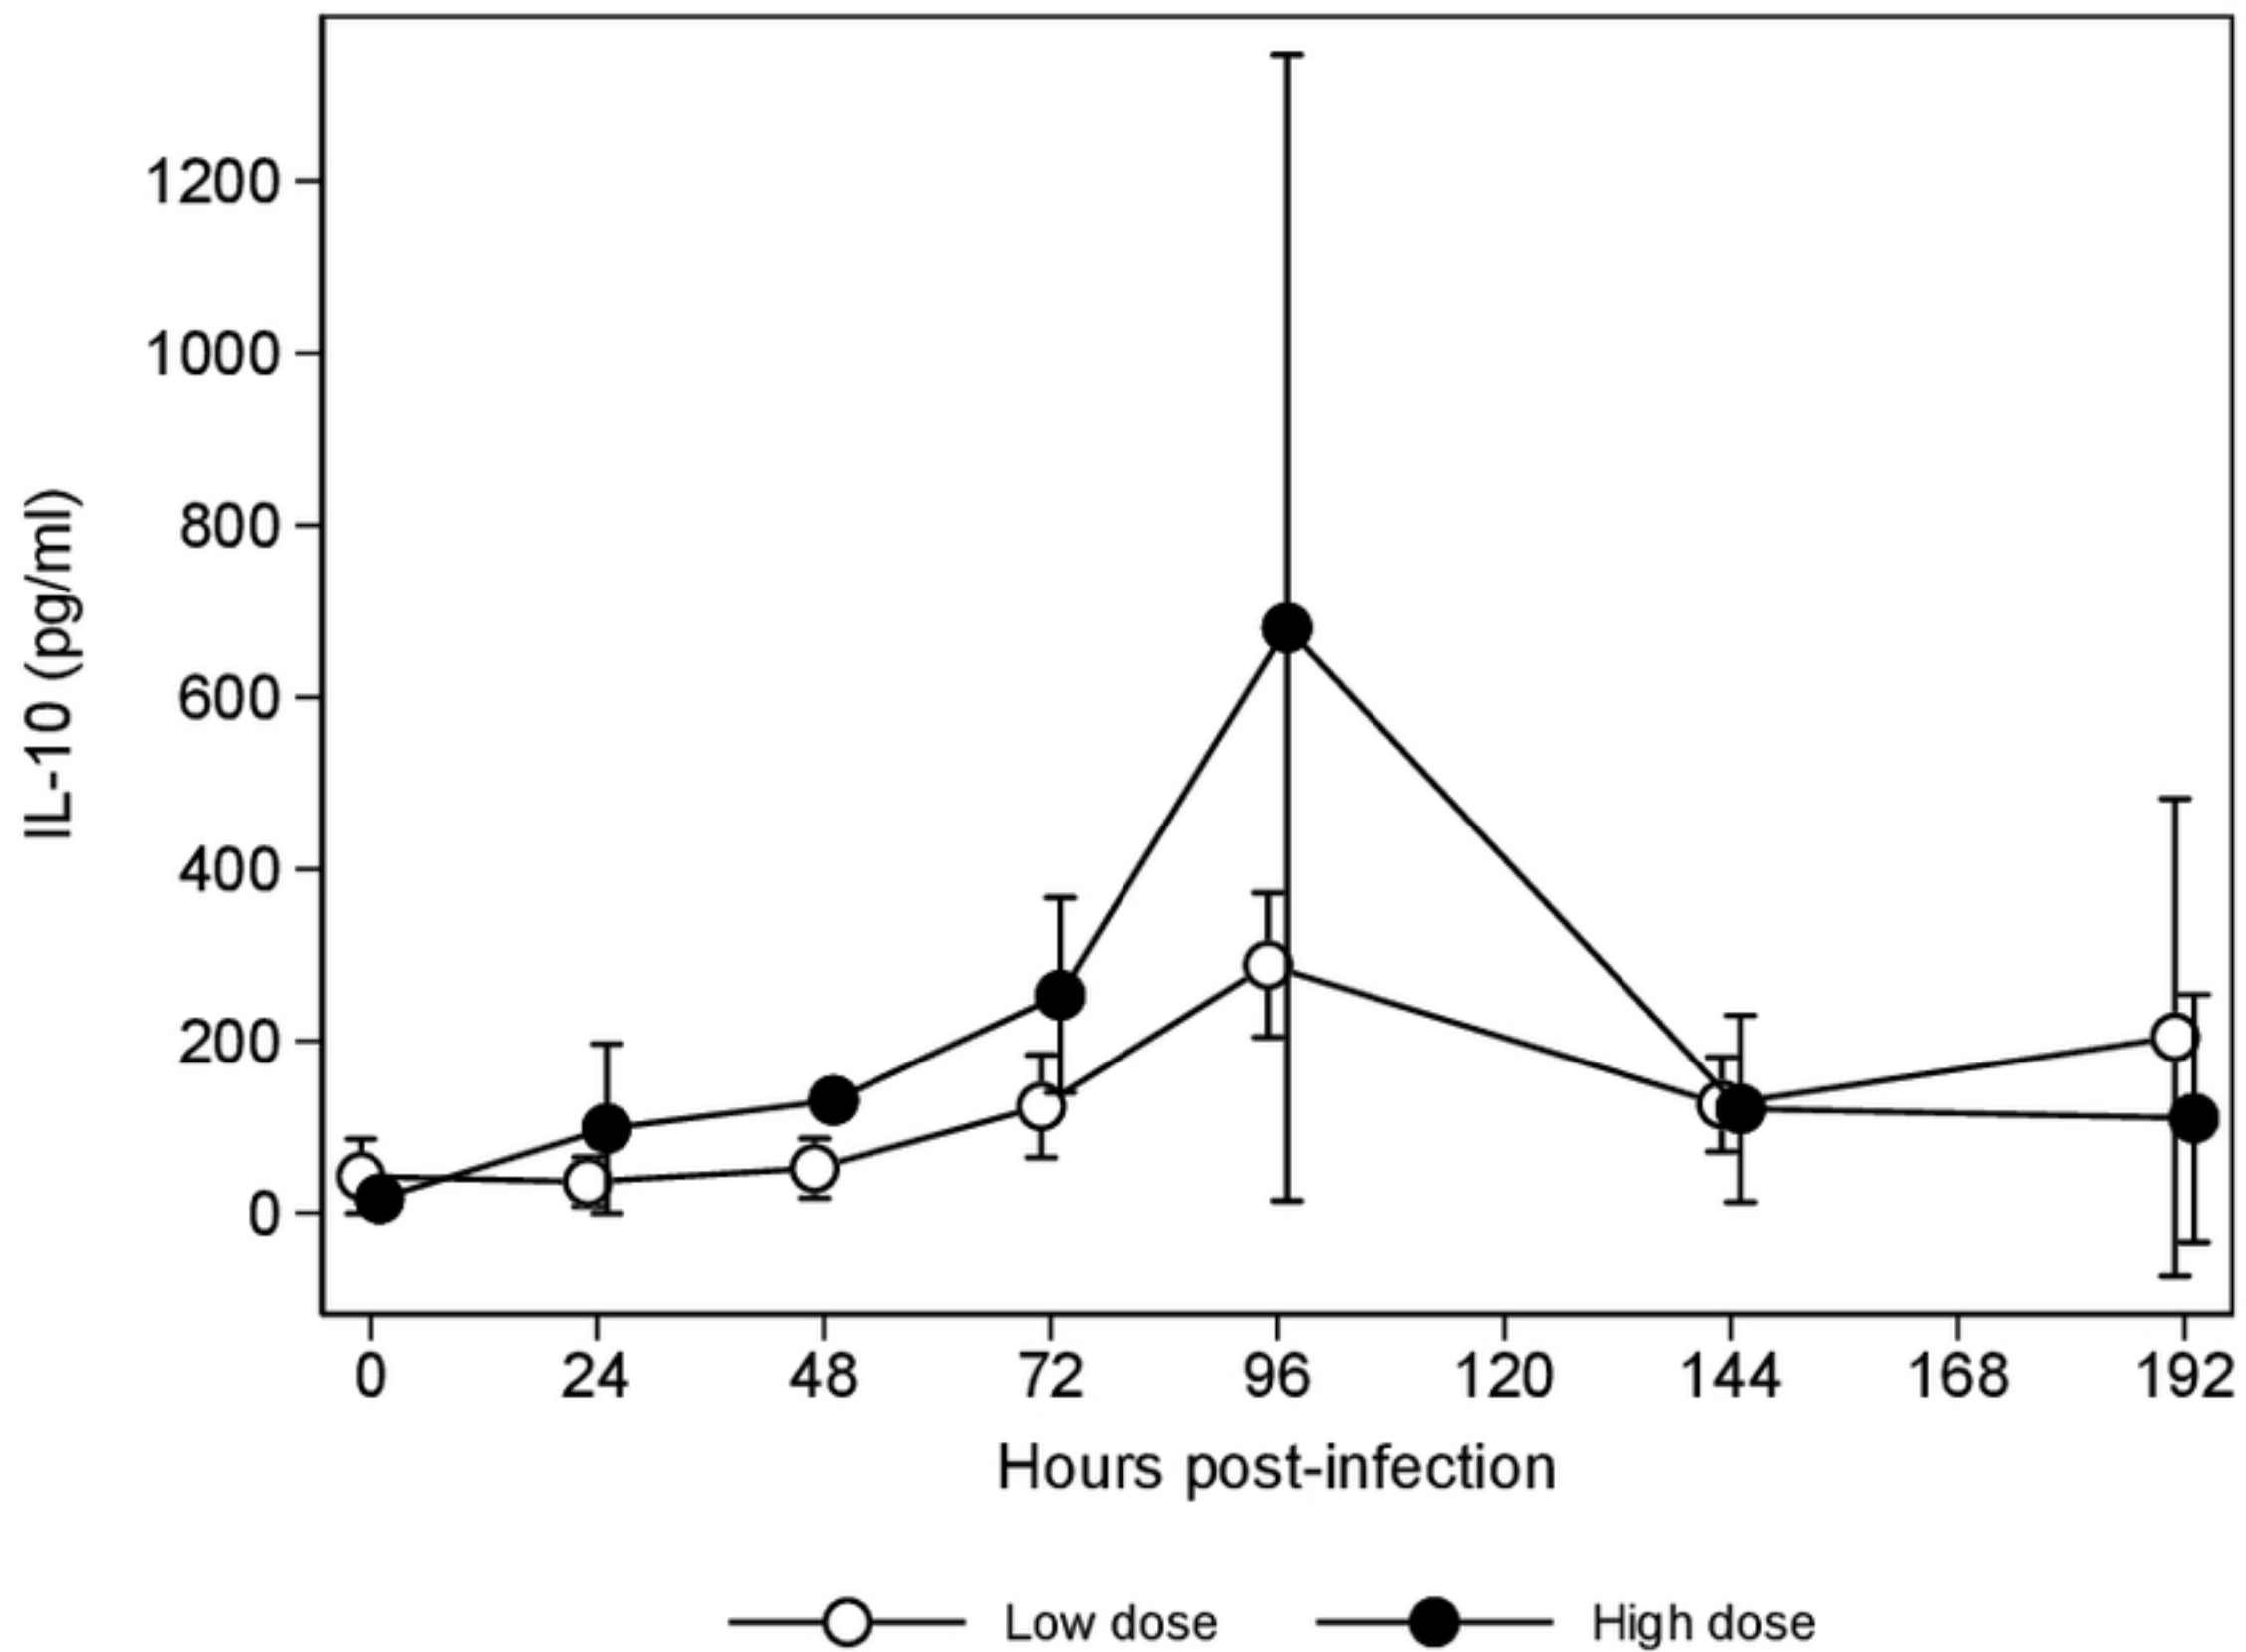

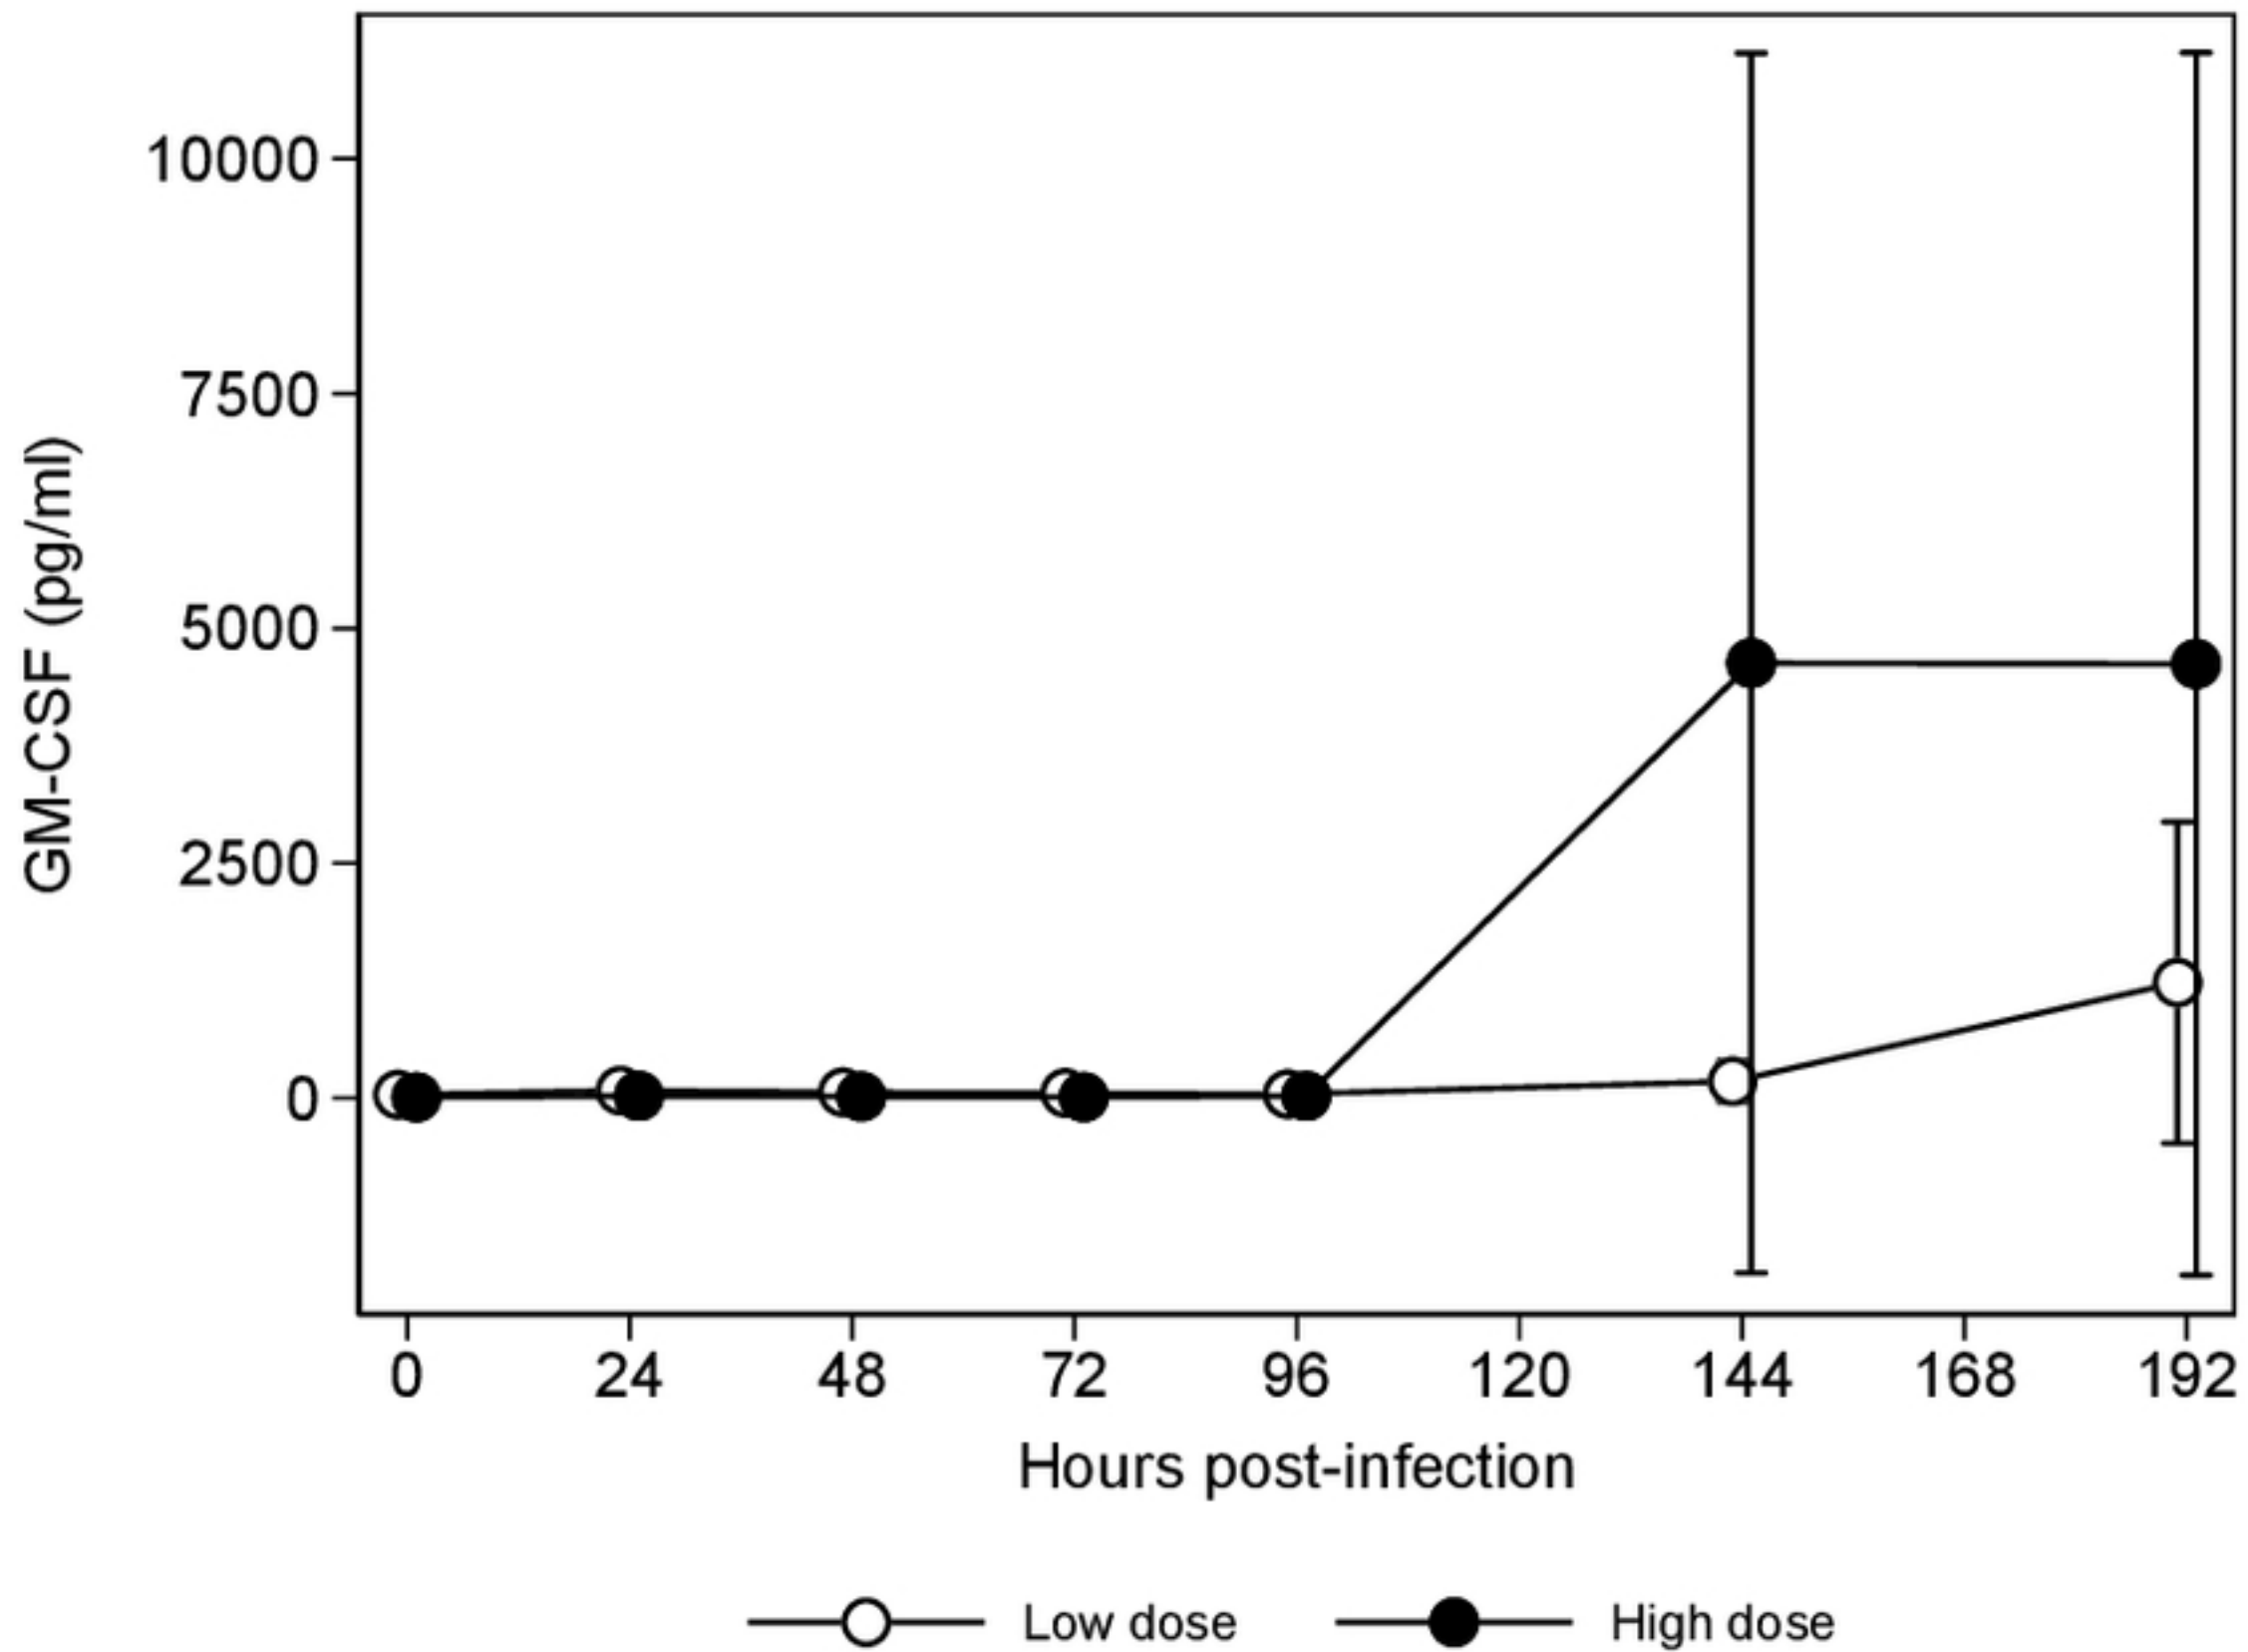



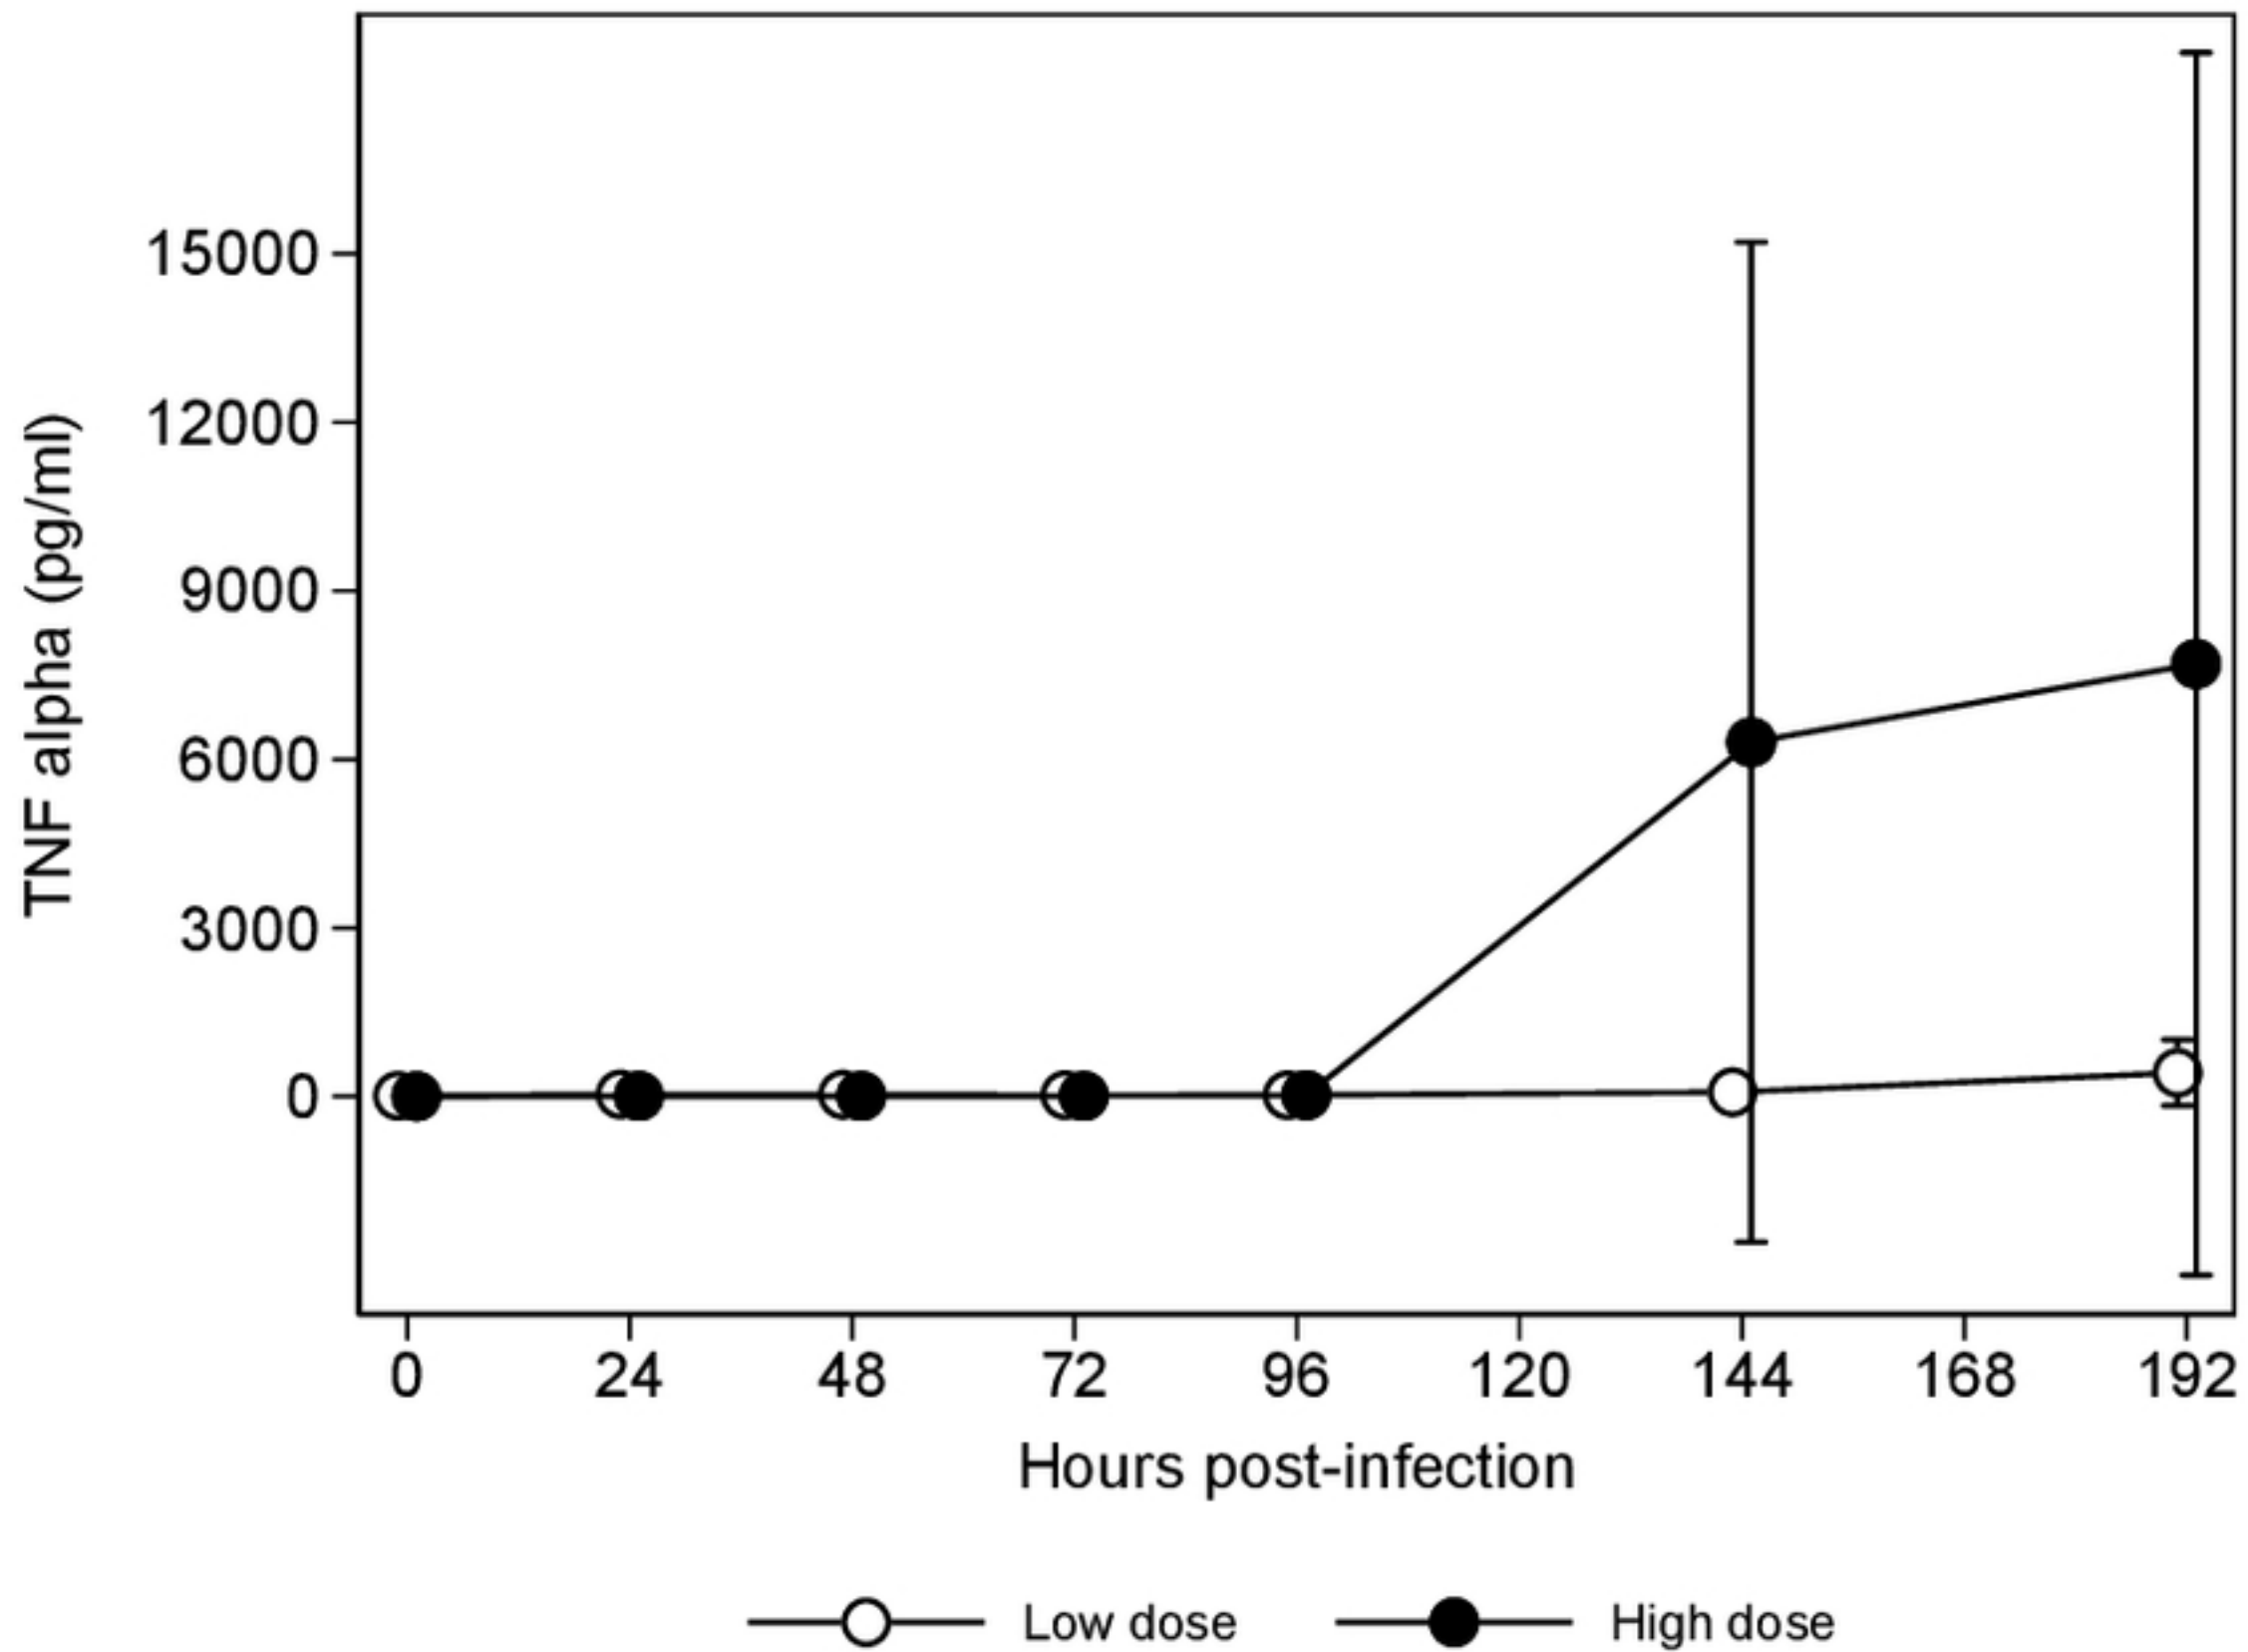

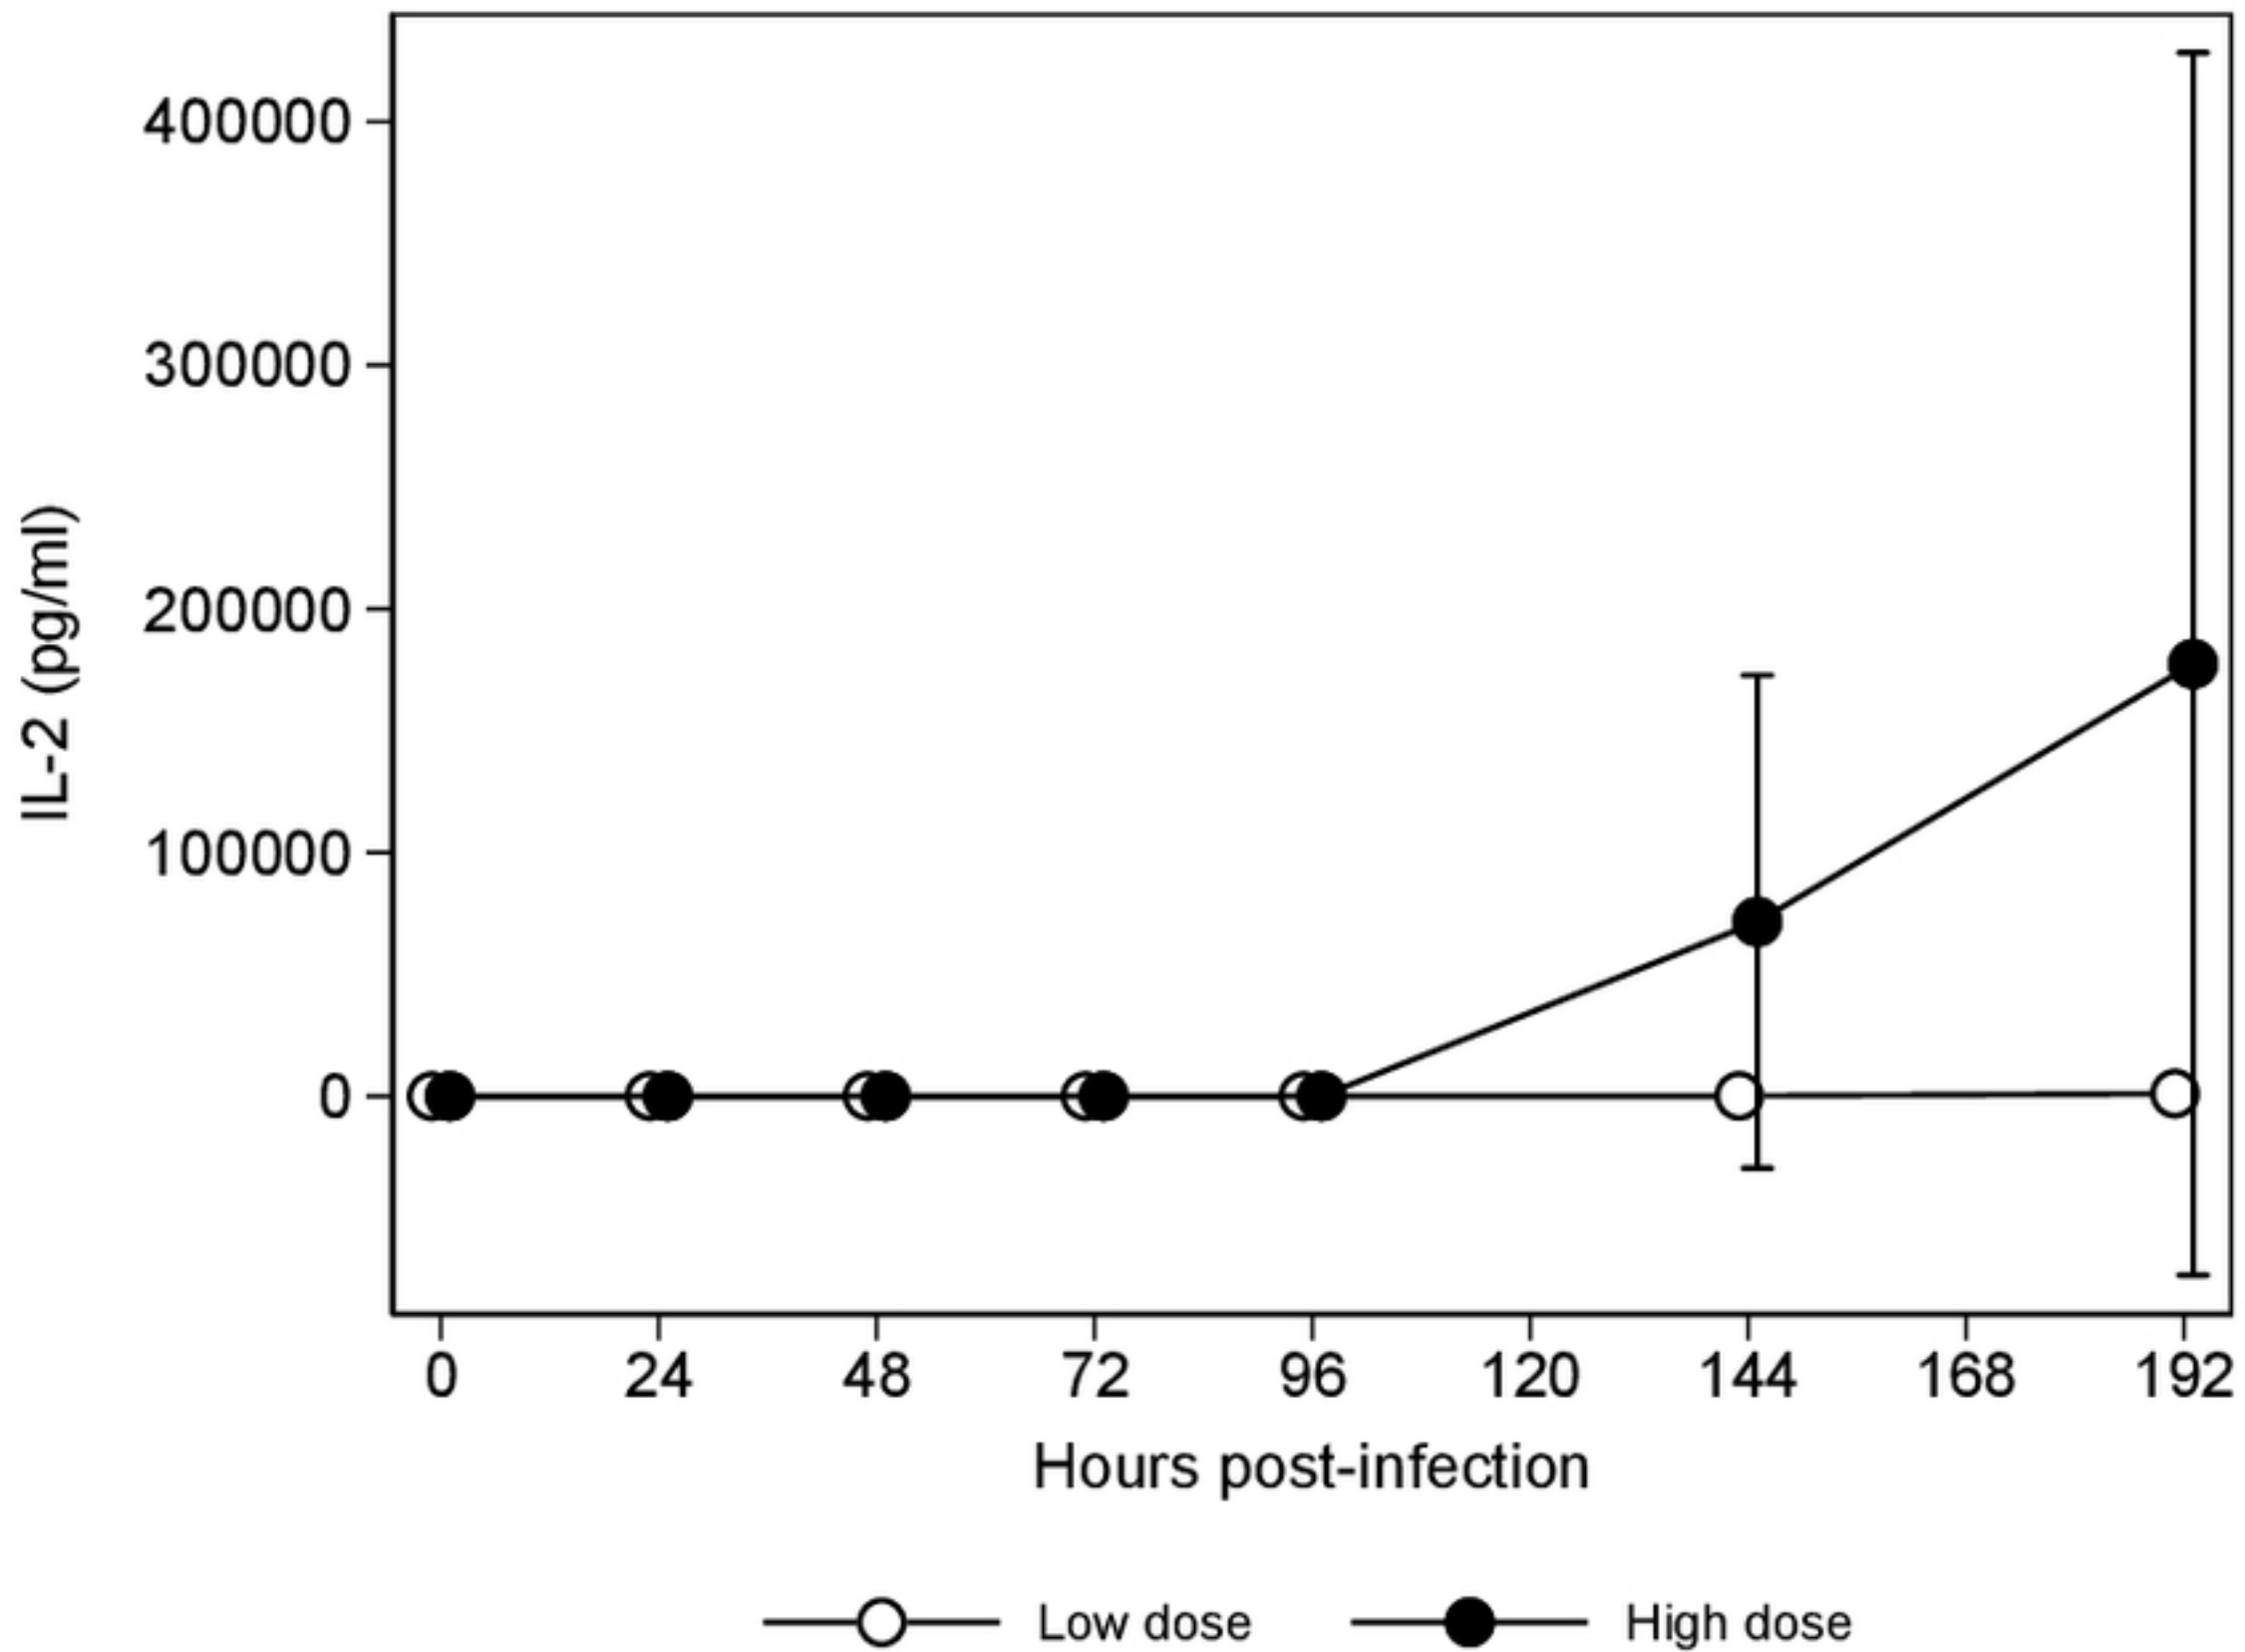

Source: https://www.biorxiv.org/content/10.1101/2021.09.16.460686v1.full.pdf
